# Supplementary material for: Insights into mobile genetic elements and the role of conjugative plasmid in transferring aminoglycoside resistance in extensively drug-resistant Acinetobacter baumannii AB329
Source: PeerJ. 2022 Jul 13;10:e13718. doi: 10.7717/peerj.13718 (PMC9288165; doi:10.7717/peerj.13718)
Supplement: Supplemental Information 1 [file peerj-10-13718-s001.xlsx]

## Sheet: Table S1
The complete genomes of 292 A. baumannii strains retrieved from the NCBI database
Strain	Molecules	AccessionNo.	Source	Country	Year of isolation
3207	Chromosome	CP015364.1	Bronchial fluid	Mexico	2008
5845	Chromosome	CP023034.1	Wound	Mexico	2009
6200	Chromosome	CP010397.1	Bodily fluid	Colombia	2012
6507	Chromosome	CP045528.1	NA	India	2019
7804	Chromosome	CP022283.1	Bronchoalveolar Lavage Fluid	Mexico	2017
7835	Chromosome	CP033243.1	Tissue	Mexico	2007
7847	Chromosome	CP023031.1	Blood	Mexico	2008
9102	Chromosome	CP023029.1	Bronchial fluid	Mexico	2010
9201	Chromosome	CP023020.1	Blood	Mexico	2018
10042	Chromosome	CP023026.1	Secretion	Mexico	2011
10324	Chromosome	CP023022.1	Bronchial fluid	Mexico	2012
40288	Chromosome	CP077801.1	Urine	France	2015
2014LNAB1	Chromosome	CP059352.1	Blood	China	2014
09A16CRGN0014	Chromosome	CP034242.1	NA	Canada	2016
09A16CRGN003B	Chromosome	CP034243.1	NA	Canada	2016
10_3	Chromosome	CP059547.1	Field soil	USA	NA
10_4	Chromosome	CP059546.1	Field soil	USA	NA
11A1213CRGN008	Chromosome	CP035186.1	NA	Canada	2012
11A1213CRGN055	Chromosome	CP035185.1	NA	Canada	2012
11A1213CRGN064	Chromosome	CP043419.1	NA	Canada	2012
11A1314CRGN088	Chromosome	CP035184.1	NA	Canada	2013
11A1314CRGN089	Chromosome	CP043418.1	NA	Canada	2013
11A14CRGN003	Chromosome	CP035183.1	NA	Canada	2014
11W359501	Chromosome	CP041035.1	NA	UnitedKingdom:Nottingham	2019
15A34	Chromosome	CP020590.1	Pulmonary	SouthKorea	2014
15A5	Chromosome	CP020574.1	pulmonary	SouthKorea	2013
1656-2	Chromosome	CP001921.1	NA	NA	NA
17-84	Chromosome	CP059479.1	NA	China	2017
17978UN	Chromosome	CP079931.1	NA	France	1951
2008S11-069	Chromosome	CP033516.1	NA	Taiwan	2008
2014BJAB1	Chromosome	CP059354.1	Blood	China	2014
2014TJAB1	Chromosome	CP059349.1	Blood	China	2014
2016BJAB1	Chromosome	CP059355.1	Sputum	China	2016
2016LNAB1	Chromosome	CP059353.1	Cerebral-spinalfluid	China	2016
2018BJAB1	Chromosome	CP059351.1	Sputum	China	2018
2018BJAB2	Chromosome	CP059350.1	Bronchial	China	2018
2018HBAB1	Chromosome	CP059356.1	Abdominal fluid	China	2018
2018HLJAB1	Chromosome	CP059358.1	Pus	China	2018
2018HLJAB2	Chromosome	CP059357.1	Abdominal fluid	China	2018
2018TJAB1	Chromosome	CP059359.1	Blood	China	2018
29FS20	Chromosome	CP044519.1	Feces	China	2017
31FS3-2	Chromosome	CP044517.1	Feced	China	2017
36-1512	Chromosome	CP059386.1	Respiratory tract	Russia	2013
810CP	Chromosome	CP026338.1	Feces	Mexico	2018
A1	Chromosome	CP010781.1	NA	UK	1982
A118	Chromosome	CP059039.1	Blood	NA	1995
A1296	Chromosome	CP018332.1	Sputum	China	2010
A1429	Chromosome	CP046898.1	secretion	China	2010
A320(RUH134)	Chromosome	CP032055.1	NA	Netherlands	1982
A388	Chromosome	CP024418.1	NA	Greece	2002
A52	Chromosome	CP034092.1	Sputum	China	2015
A85	Chromosome	CP021782.1	Sputum	Australia	2003
AB0057	Chromosome	CP001182.2	NA	NA	NA
AB030	Chromosome	CP009257.1	Hospital	Canada	2014
AB031	Chromosome	CP009256.1	NA	Canada	2010
AB042	Chromosome	CP019034.1	NA	NA	NA
AB043	Chromosome	CP043910.1	Generated in lab	NA	NA
Ab04-mff	Chromosome	CP012006.1	Blood	Canada	2012
AB053	draft genome	JABCNM000000000	Sputum	Thailand	2013
AB140	draft genome	JABCNI000000000	Sputum	Thailand	2014
AB307-0294	Chromosome	CP001172.2	NA	NA	NA
AB329	Chromosome	CP091452.1	Sputum	Thailand	2015
AB34299	Chromosome	CP014291.1	NA	NA	2015
AB43	Chromosome	CP083181.1	Sputum	China	2017
Ab4568	Chromosome	CP024613.1	Sputum	China	2011
Ab4653	Chromosome	CP024612.1	Sputum	China	2011
Ab4977	Chromosome	CP024611.1	Sputum	China	2011
AB5075-UW	Chromosome	CP008706.1	Tibia/Osteomyelitis	USA	2008
AB5075-VUB	Chromosome	CP070362.2	NA	Belgium	2008
AB5075-VUB-itrA::ISAba13	Chromosome	CP070358.1	NA	Belgium	2008
ab736	Chromosome	CP015121.1	NA	USA	2015
Aba	Chromosome	CP030083.1	NA	China	2016
Aba1	Chromosome	CP060732.1	Bronchial	China	2020
Ab-B004d-c	Chromosome	CP051875.1	Sputum	Ghana	2020
Ab-C102	Chromosome	CP051862.1	Blood	Ghana	2016
Ab-C63	Chromosome	CP051866.1	Sputum	Ghana	2016
AbCAN2	Chromosome	CP045428.1	Coccygeal isolate	Canada	2015
ABCR01	Chromosome	CP042931.1	Sputum	Thailand	2019
AbCTX1	Chromosome	CP060029.1	Throat sample	France	2021
AbCTX13	Chromosome	CP059729.1	Peritoneal fluid	France	2017
AbCTX5	Chromosome	CP060505.1	Catheter	France	2015
AbCTX9	Chromosome	CP060504.1	Bronchoalveolar Lavage Fluid	France	2017
Ab-D10a-a	Chromosome	CP051869.1	Cerebral-spinalfluid	Ghana	2020
AbH12O-A2	Chromosome	CP009534.1	NA	NA	NA
ABNIH28	Chromosome	CP026125.1	NA	USA	2016
AbPK1	Chromosome	CP024576.1	Sheepbrocho-alveolarlavage	Pakistan	2012
ABUH763	Chromosome	CP035051.1	NA	NA	NA
ABUH773	Chromosome	CP035049.1	NA	NA	2015
ABUH793	Chromosome	CP035045.1	NA	NA	2015
ABUH796	Chromosome	CP035043.1	NA	NA	2015
AC1633	Chromosome	CP059300.1	Blood	Malaysia	2016
AC29	Chromosome	CP007535.2	Endotracheal secretion	Malaysia	2011
AC30	Chromosome	CP007577.1	Endotrachial secretion	Malaysia	2011
ACI713	Chromosome	CP086759.1	NA	Germany	2018
ACICU	Chromosome	CP000863.1	NA	NA	NA
ACN21	Chromosome	CP038644.1	NA	NA	NA
AF-401	Chromosome	CP018254.1	Small colone	Mexico	2016
AF-673	Chromosome	CP018256.1	Sputum	USA	2008
AR_0052	Chromosome	CP027183.1	NA	NA	NA
AR_0056	Chromosome	CP027123.1	NA	NA	CDC
AR_0063	Chromosome	CP026711.1	NA	CDC	NA
AR_0070	Chromosome	CP027178.1	NA	CDC	2018
AR_0078	Chromosome	CP026761.1	NA	NA	NA
AR_0083	Chromosome	CP027528.1	NA	CDC	2018
AR_0088	Chromosome	CP027530.1	NA	CDC	NA
AR_0101	Chromosome	CP027611.1	NA	CDC	2018
AR_0102	Chromosome	CP027607.1	NA	NA	NA
ARLG_6295	Chromosome	CP081144.1	Respiratory tract	USA	2018
ARLG_6344	Chromosome	CP081139.1	Blood	USA	2018
ARLG_6420	Chromosome	CP081137.1	Blood	USA	2018
Ax270	Chromosome	CP049240.1	Animal(cat)	Lebanon	2015
AYE	Chromosome	CU459141.1	NA	NA	NA
AYP-A2	Chromosome	CP024124.1	Wound	Australia	2013
B10	Chromosome	CP079942.1	Sputum	China	2018
B8300	Chromosome	CP021347.1	NA	NA	NA
B8342	Chromosome	CP021342.1	Blood	India	2014
B9	Chromosome	CP059548.1	Seine River	France	NA
BAL062	Chromosome	LT594095.1	NA	NA	NA
BJAB07104	Chromosome	CP003846.1	NA	NA	NA
BJAB0715	Chromosome	CP003847.1	NA	China	NA
BJAB0868	Chromosome	CP003849.1	NA	NA	NA
C25	Chromosome	CP032743.1	Cerebral-spinalfluid	China	2015
CA-17	Chromosome	CP012587.1	NA	Australia	2010
CAb-65	Chromosome	CP060994.1	Faecal	Malaysia	2018
CAM180-1	Chromosome	CP044356.1	Oral cavity	Cambodia	2016
CBA7	Chromosome	CP020586.1	Sputum	SouthKorea	2013
CEBITEC	Chromosome	LN865143.1	Human skin tissue	NA	NA
CFSAN093705	Chromosome	CP061525.1	Urine	USA	2009
CFSAN093706	Chromosome	CP061523.1	NA	NA	NA
CFSAN093707	Chromosome	CP061521.1	Sterile body site	USA	2004
CFSAN093708	Chromosome	CP061519.1	Wound	USA	2004
CFSAN093709	Chromosome	CP061517.1	Urine	USA	2007
CFSAN093710	Chromosome	CP061514.1	Sterile body site	USA	2005
CIAT758	Chromosome	CP038500.1	Blood	India	2018
Cl300	Chromosome	CP082952.1	Tracheal aspirate	Lebanon	2015
Cl415	Chromosome	CP071763.1	Blood	Lebanon	2017
CMC-CR-MDR-Ab4	Chromosome	CP016295.1	BAL	USA	NA
CMC-CR-MDR-Ab66	Chromosome	CP016300.1	TA	USA	NA
CMC-MDR-Ab59	Chromosome	CP016298.1	Sputum	USA	NA
CUVET-MIC596	Chromosome	CP041148.1	Urine	Thailand	2017
D1279779	Chromosome	CP003967.2	NA	Australia	NA
D36	Chromosome	CP012952.1	Wound	Australia	2008
D4	Chromosome	CP048849.1	Wound	Australia	2021
D46	Chromosome	CP048131.1	Mid streamurine	Australia	2010
DA33098	Chromosome	CP029569.1	NA	NA	NA
DA33382	Chromosome	CP030106.1	Tracheal secretion	Germany	NA
DD520	Chromosome	CP075321.1	Hospital	China	2021
DETAB-E227	Chromosome	CP072526.1	NA	China	2019
DETAB-P2	Chromosome	CP047973.1	rectal swab	China	2019
DETAB-P39	Chromosome	CP073060.1	Patient	China	2019
DS002	Chromosome	CP027704.2	Soil	India	2005
DT01139C	Chromosome	CP053218.1	NA	Tanzania	2017
DT0544C	Chromosome	CP053215.1	NA	Tanzania	2017
DT-Ab003	Chromosome	CP050916.1	Stethoscope	China	2017
DT-Ab007	Chromosome	CP050914.1	Sputum	China	2017
DT-Ab020	Chromosome	CP050911.1	Sputum	China	2018
DT-Ab022	Chromosome	CP050907.1	Sputum	China	2017
DT-Ab057	Chromosome	CP050904.1	Bronchoalveolar Lavage Fluid	China	2019
DU202	Chromosome	CP017152.1	NA	NA	NA
E-011922	Chromosome	CP059542.1	Papermill Kaolin	Finland	NA
E-072658	Chromosome	CP061705.1	Papermill Kaolin	Finland	NA
E47	Chromosome	CP042556.1	NA	Australia	2013
EC	Chromosome	CP038262.1	NA	Czech	2018
EH	Chromosome	CP038258.1	NA	Czech	2018
Ex003	Chromosome	CP049314.1	Water	Lebanon	2012
FDAARGOS_1036	Chromosome	CP066016.1	NA	USA	NA
FDAARGOS_1359	Chromosome	CP069851.1	NA	USA	NA
FDAARGOS_1360	Chromosome	CP069840.1	NA	USA	NA
FDAARGOS_533	Chromosome	CP033768.1	Sputum	NA	2016
FDAARGOS_540	Chromosome	CP033754.1	NA	NA	NA
G20AB007	Chromosome	CP066237.1	Blood	SouthKorea	2020
G20AB009	Chromosome	CP066235.1	Blood	SouthKorea	2020
G20AB010	Chromosome	CP066232.1	Blood	SouthKorea	2020
G20AB011	Chromosome	CP066229.1	Blood	SouthKorea	2020
HKU3	Chromosome	CP084733.1	Hospital	HongKong	2020
HKU4	Chromosome	CP084730.1	NA	HongKong	NA
HKU5	Chromosome	CP084727.1	Hospital	HongKong	NA
HKU6	Chromosome	CP084724.1	NA	HongKong	NA
HKU7	Chromosome	CP084721.1	Hospital	HongKong	2020
HRAB-85	Chromosome	CP018143.1	Sputum	China	2014
HWBA8	Chromosome	CP020597.1	Sputum	SouthKorea	2013
IOMTU433	Chromosome	AP014649.1	NA	Japan	NA
J9	Chromosome	CP041587.1	NA	NA	NA
JBA13	Chromosome	CP020584.1	Sputum	SouthKorea	2013
K09-14	Chromosome	CP043953.1	Soil	Malasia	2017
KAB01	Chromosome	CP017642.1	Bronchial	SouthKorea	2015
KAB02	Chromosome	CP017644.1	Bronchial	SouthKorea	2015
KAB03	Chromosome	CP017646.1	Sputum	SouthKorea	2015
KAB04	Chromosome	CP017648.1	Sputum	SouthKorea	2015
KAB05	Chromosome	CP017650.1	Blood	SouthKorea	2015
KAB06	Chromosome	CP017652.1	Wound	SouthKorea	2015
KAB07	Chromosome	CP017654.1	Sputum	SouthKorea	2015
KAB08	Chromosome	CP017656.1	Wound	SouthKorea	2015
KBN10P02143	Chromosome	CP013924.1	Pus	SouthKorea	2012
KSK1	Chromosome	CP072122.1	Respiratory specimen	India	2020
KSK10	Chromosome	CP072280.1	Respiratory specimen	India	2021
KSK11	Chromosome	CP072285.1	Respiratory specimen	India	2020
KSK18	Chromosome	CP072290.1	Respiratory specimen	India	2021
KSK19	Chromosome	CP072295.1	Respiratory specimen	India	2021
KSK2	Chromosome	CP072398.1	Respiratory specimen	India	2020
KSK20	Chromosome	CP072300.1	Respiratory specimen	India	2021
KSK6	Chromosome	CP072270.1	Respiratory specimen	India	2021
KSK7	Chromosome	CP072275.1	Respiratory specimen	India	2021
KSKSensitive	Chromosome	CP072305.1	Respiratory specimen	India	2020
LAC-4	Chromosome	CP007712.1	NA	USA	1997
LHC22-2	Chromosome	CP084297.1	a feces sample of chicken origin	China	2020
MDR-CQ	Chromosome	CP019114.1	NA	China	2016
MDR-TJ	Chromosome	CP003500.1	NA	NA	NA
MDR-UNC	Chromosome	CP031444.1	Leg musscle	USA	2012
MDR-ZJ06	Chromosome	CP001937.2	NA	China	2006
MRSN15313	Chromosome	CP033869.1	Cerebral-spinal fluid	Brazil	2018
MRSN56	Chromosome	CP080452.1	Hip	USA	2010
MS14413	Chromosome	CP054302.1	Urine	Australia	2016
N13-03449	Chromosome	CP043417.1	NA	Canada	2013
NCGM237	Chromosome	AP013357.1	NA	NA	NA
NCIMB8209	Chromosome	CP028138.1	Aerobic microbial decomposition of whole and defoliated guayule(retting)	USA	1943
NCTC13421	Chromosome	LS483472.1	NA	NA	NA
NCTC7364	Chromosome	LT605059.1	NA	NA	NA
NIPH17_0019	Chromosome	AP024415.1	Blood	Cambodia	2017
OCU_Ac16a	Chromosome	AP023077.1	Tracheal aspirate from a hospitalized	Japan	2015
OCU_Ac18	Chromosome	AP024802.1	Hospital	Japan	2016
ORAB01	Chromosome	CP015483.1	Bodily fluid	USA	2012
P7774	Chromosome	CP040259.1	Pus	India	2019
PB364	Chromosome	CP040425.1	NA	USA	2016
PG20180064	Chromosome	CP043180.1	Mousegut	NA	2018
PM1912235	Chromosome	CP050410.1	Pus	India	2009
PM192696	Chromosome	CP050412.1	Sputum	India	2019
PM193665	Chromosome	CP050415.1	Pus	india	2019
PM194188	Chromosome	CP050425.1	BAL	India	2019
PM194229	Chromosome	CP050432.1	BAL	India	2019
R2090	Chromosome	LN868200.1	Tissue	NA	NA
R2091	Chromosome	LN997846.1	Tissue	NA	NA
RCH52	Chromosome	CP085788.1	NA	NA	NA
Res13-Abat-PEA21-P4-01-A	Chromosome	CP062919.1	Swab	Canada	2018
SAA14	Chromosome	CP020579.1	Blood	SouthKorea	2013
SD	Chromosome	CP064292.1	Clinical isolate	USA	2018
SHOU-Ab01	Chromosome	CP087594.1	Andriasdavidianus	China	2021
SMC_Paed_Ab_BL01	Chromosome	CP025266.1	Blood	SouthKorea	2012
SP304	Chromosome	CP040080.1	Sputum	India	2019
SSA12	Chromosome	CP020578.1	Blood	SouthKorea	2013
SSA6	Chromosome	CP020591.1	Endo tracheal aspirate	SouthKorea	2019
SSMA17	Chromosome	CP020581.1	Bronchial washing fluid	SouthKorea	2013
TCDC-AB0715	Chromosome	CP002522.2	NA	NA	2011
TG22182	Chromosome	CP039993.1	trachasp	USA	2011
TG22627	Chromosome	CP039520.1	trachasp	USA	2011
TG22653	Chromosome	CP039518.1	BAL	USA	2011
TG29392	Chromosome	CP039930.1	Blood	USA	2012
TG31302	Chromosome	CP039343.1	trachasp	USA	2012
TG31986	Chromosome	CP039341.1	trachasp	USA	2012
TP1	Chromosome	CP056784.2	Human clinical sample	USA	2016
TP2	Chromosome	CP060011.1	Human clinical sample	USA	2016
TP3	Chromosome	CP060013.1	Human clinical sample	USA	2016
TYTH-1	Chromosome	CP003856.1	NA	NA	NA
USA15	Chromosome	CP020595.1	Sputum	SouthKorea	2013
USA2	Chromosome	CP020592.1	Urine	SouthKorea	2013
VB11737	Chromosome	CP050400.1	Blood	India	2019
VB1190	Chromosome	CP040047.1	Blood	India	2019
VB16141	Chromosome	CP040050.1	Blood	India	2019
VB2107	Chromosome	CP051474.1	Sputum	India	2019
VB2139	Chromosome	CP050526.1	Sputum	India	2019
VB2181	Chromosome	CP050401.1	NA	India	NA
VB2200	Chromosome	CP050421.1	NA	India	NA
VB23193	Chromosome	CP035672.1	NA	NA	NA
VB2486	Chromosome	CP050403.1	Sputum	India	2020
VB31459	Chromosome	CP035930.1	Blood	India	2017
VB33071	Chromosome	CP040084.1	Blood	India	2018
VB35179	Chromosome	CP040053.1	Blood	India	2018
VB35435	Chromosome	CP040056.1	Blood	India	2018
VB35575	Chromosome	CP040087.1	Blood	India	2018
VB473	Chromosome	CP050388.1	Sputum	India	2019
VB7036	Chromosome	CP050523.1	Blood	India	2019
VB723	Chromosome	CP050390.1	Blood	india	2019
VB82	Chromosome	CP050385.1	Blood	India	2020
VB958	Chromosome	CP040040.1	Blood	India	2019
WCHAB005078	Chromosome	CP027246.2	NA	China	NA
WCHAB005133	Chromosome	CP026750.2	NA	China	NA
WKA02	Chromosome	CP020598.1	Sputum	SouthKorea	2013
WP4-W18-ESBL-11	Chromosome	AP022077.1	Waste water	Japan	2018
WP8-W18-ESBL-11	Chromosome	AP022238.1	Waste water treatment plant effluent	Japan	2018
XDR-BJ83	Chromosome	CP018421.1	NA	China	2007
XH1344	Chromosome	CP061541.1	NA	China	2019
XH386	Chromosome	CP010779.1	Lower respiratory tract	China	2016
XH731	Chromosome	CP019217.1	Sputum	China	2014
XH856	Chromosome	CP014541.1	Drainage fluid	China	2010
XH857	Chromosome	CP014540.1	Sputum	China	2010
XH858	Chromosome	CP014528.1	Sputum	China	2016
XH859	Chromosome	CP014539.1	Wound	China	2009
XH860	Chromosome	CP014538.1	NA	China	2009
XH906	Chromosome	CP023140.1	Blood	China	2016
XL380	Chromosome	CP046536.1	Cucumber rhizosphere	China	2018
XYAB2018	Chromosome	CP060285.1	Blood	China	2018
YU-R612	Chromosome	CP014215.1	Sputum	SouthKorea	2014
ZW85-1	Chromosome	CP006768.1	NA	NA	2013

## Sheet: Table S2
Antibiotic susceptibility pattern of AB329 and MIC assay of strains used in cojugation experiment
Class	Antibiotics	Disk diffusion (Resistant/Sensitive)	Minimum Inhibitory Concentration (MIC)
Carbapenems	Imipenem	R	32
	Meropenem	R	ND
Fluoroquinolones	Ciprofloxacin	R	ND
Aminoglycosides	Amikacin	R	ND
	Gentamicin	R	ND
Folate pathway inhibitors	Trimethoprim-sulfamethoxazole	R	ND
Other	Cefoperazone-sulbactam	R	ND
Polymycins	Colistin	S*	1
Glycylcycline	Tigecycline	S*	0.25
ND, not determined.
Minimum Inhibitory Concentration (MIC) assays of strains used in conjugation experiment.
	A. baumannii 329	A. baumannii NU13R	Transconjugant
Kanamycin	>64 ug/ml	2 ug/ml	>64 ug/ml
Antibiotic susceptibility was interpreted according to the Clinical Laboratory Standard Institute (CLSI 2020) and Piewngam (2014)
1. CLSI. Performance Standards for Antimicrobial Susceptibility Testing. 31st ed. CLSI supplement M100. Clinical and Laboratory Standards Institute; 2020
2.* Piewngam P, Kiratisin P. Comparative assessment of antimicrobial susceptibility testing for tigecycline and colistin against Acinetobacter baumannii clinical isolates, including multidrug-resistant isolates. Int J Antimicrob Agents. 2014 Nov;44(5):396-401.

## Sheet: TableS3
Supplementary Table 1.The annotation of genomes, positions, directions and putative functions of each gene of AB329
Locus_tag	Type	Start	End	Length_bp	Strand	Gene	EC_number	COG	product
AMODNKIM_00001	CDS	1	1398	1398	+	dnaA_1		COG0593	Chromosomal replication initiator protein DnaA
AMODNKIM_00002	CDS	1496	2644	1149	+	dnaN		COG0592	Beta sliding clamp
AMODNKIM_00003	CDS	2659	3741	1083	+	recF		COG1195	DNA replication and repair protein RecF
AMODNKIM_00004	CDS	3794	6262	2469	+	gyrB	5.6.2.2	COG0187	DNA gyrase subunit B
AMODNKIM_00005	CDS	6300	6692	393	+	cybC		COG3783	Soluble cytochrome b562
AMODNKIM_00006	CDS	6776	7333	558	-	dedA_1		COG0586	Protein DedA
AMODNKIM_00007	CDS	7584	9515	1932	-	yheS_1		COG0488	putative ABC transporter ATP-binding protein YheS
AMODNKIM_00008	CDS	9772	10776	1005	+				hypothetical protein
AMODNKIM_00009	CDS	11032	12039	1008	+				hypothetical protein
AMODNKIM_00010	CDS	12382	13386	1005	+				hypothetical protein
AMODNKIM_00011	CDS	13511	13846	336	+	erpA		COG0316	Iron-sulfur cluster insertion protein ErpA
AMODNKIM_00012	CDS	13903	14748	846	-	ephA	3.3.2.10		Epoxide hydrolase A
AMODNKIM_00013	CDS	14876	16003	1128	-	anmK	2.7.1.170	COG2377	Anhydro-N-acetylmuramic acid kinase
AMODNKIM_00014	CDS	16083	17297	1215	+	tyrS	6.1.1.1	COG0162	Tyrosine--tRNA ligase
AMODNKIM_00015	rRNA	18160	19692	1533	+				16S ribosomal RNA
AMODNKIM_00016	tRNA	19753	19829	77	+				tRNA-Ile(gat)
AMODNKIM_00017	tRNA	19885	19960	76	+				tRNA-Ala(tgc)
AMODNKIM_00018	rRNA	20303	23192	2890	+				23S ribosomal RNA
AMODNKIM_00019	rRNA	23381	23491	111	+				5S ribosomal RNA
AMODNKIM_00020	CDS	24011	24553	543	-				hypothetical protein
AMODNKIM_00021	CDS	24688	25170	483	-	fkpB	5.2.1.8	COG1047	FKBP-type 16 kDa peptidyl-prolyl cis-trans isomerase
AMODNKIM_00022	CDS	25172	25702	531	-	lspA	3.4.23.36	COG0597	Lipoprotein signal peptidase
AMODNKIM_00023	CDS	25695	28532	2838	-	ileS	6.1.1.5	COG0060	Isoleucine--tRNA ligase
AMODNKIM_00024	CDS	28594	29595	1002	-	ribF		COG0196	Bifunctional riboflavin kinase/FMN adenylyltransferase
AMODNKIM_00025	CDS	29804	30937	1134	+				hypothetical protein
AMODNKIM_00026	CDS	31018	31584	567	+	mtnN_1	3.2.2.9	COG0775	5'-methylthioadenosine/S-adenosylhomocysteine nucleosidase
AMODNKIM_00027	CDS	31619	32239	621	-	rutR		COG1309	HTH-type transcriptional regulator RutR
AMODNKIM_00028	CDS	32500	33300	801	-	ssuB_1	3.6.3.-	COG1116	Aliphatic sulfonates import ATP-binding protein SsuB
AMODNKIM_00029	CDS	33314	34111	798	-	ssuC_1		COG0600	Putative aliphatic sulfonates transport permease protein SsuC
AMODNKIM_00030	CDS	34108	35283	1176	-	ssuD	1.14.14.5	COG2141	Alkanesulfonate monooxygenase
AMODNKIM_00031	CDS	35310	36293	984	-	ssuA_1			Putative aliphatic sulfonates-binding protein
AMODNKIM_00032	CDS	36365	37333	969	-	ssuA_2			Putative aliphatic sulfonates-binding protein
AMODNKIM_00033	CDS	37667	39022	1356	-	argA	2.3.1.1	COG0548	Amino-acid acetyltransferase
AMODNKIM_00034	CDS	39143	39463	321	-				hypothetical protein
AMODNKIM_00035	CDS	39687	40097	411	-				hypothetical protein
AMODNKIM_00036	CDS	40315	41061	747	-	yciK	1.-.-.-	COG1028	putative oxidoreductase YciK
AMODNKIM_00037	CDS	41127	41825	699	-	mupP_1	3.1.3.105	COG0546	N-acetylmuramic acid 6-phosphate phosphatase
AMODNKIM_00038	CDS	41825	42538	714	-	ubiG	2.1.1.222	COG2227	Ubiquinone biosynthesis O-methyltransferase
AMODNKIM_00039	CDS	42718	43335	618	+	dsbA		COG0526	Thiol:disulfide interchange protein DsbA
AMODNKIM_00040	CDS	43414	44061	648	-				hypothetical protein
AMODNKIM_00041	CDS	44198	44836	639	-	fabR_1			HTH-type transcriptional repressor FabR
AMODNKIM_00042	CDS	45010	46035	1026	+		1.-.-.-	COG1018	NADPH oxidoreductase
AMODNKIM_00043	CDS	46060	47208	1149	+	desA3_1	1.14.19.-	COG3239	NADPH-dependent stearoyl-CoA 9-desaturase
AMODNKIM_00044	CDS	47367	48083	717	+	rph	2.7.7.56	COG0689	Ribonuclease PH
AMODNKIM_00045	CDS	48373	49830	1458	+	plcN_1	3.1.4.3	COG3511	Non-hemolytic phospholipase C
AMODNKIM_00046	CDS	49817	50542	726	+	plcN_2	3.1.4.3	COG3511	Non-hemolytic phospholipase C
AMODNKIM_00047	CDS	50947	51114	168	+				hypothetical protein
AMODNKIM_00048	CDS	51111	51956	846	-	nadC	2.4.2.19	COG0157	Nicotinate-nucleotide pyrophosphorylase [carboxylating]
AMODNKIM_00049	CDS	52128	52697	570	+	ampD	3.5.1.28	COG3023	1,6-anhydro-N-acetylmuramyl-L-alanine amidase AmpD
AMODNKIM_00050	CDS	52779	54320	1542	+	murJ		COG0728	putative lipid II flippase MurJ
AMODNKIM_00051	CDS	54365	55060	696	-	fkpA_1	5.2.1.8	COG0545	putative FKBP-type peptidyl-prolyl cis-trans isomerase FkpA
AMODNKIM_00052	CDS	55109	55831	723	-	fkpA_2	5.2.1.8	COG0545	putative FKBP-type peptidyl-prolyl cis-trans isomerase FkpA
AMODNKIM_00053	CDS	56024	58207	2184	-	ptk	2.7.10.-	COG0489	Tyrosine-protein kinase ptk
AMODNKIM_00054	CDS	58226	58654	429	-	ptp	3.1.3.48		Low molecular weight protein-tyrosine-phosphatase Ptp
AMODNKIM_00055	CDS	58660	59760	1101	-				hypothetical protein
AMODNKIM_00056	CDS	60116	61390	1275	+	wbpA	1.1.1.136	COG0677	UDP-N-acetyl-D-glucosamine 6-dehydrogenase
AMODNKIM_00057	CDS	61404	62600	1197	+	pglF	4.2.1.135	COG1086	UDP-N-acetyl-alpha-D-glucosamine C6 dehydratase
AMODNKIM_00058	CDS	62600	63748	1149	+	perA	2.6.1.102	COG0399	GDP-perosamine synthase
AMODNKIM_00059	CDS	63754	64890	1137	+	legG	3.2.1.184	COG0381	GDP/UDP-N,N'-diacetylbacillosamine 2-epimerase (hydrolyzing)
AMODNKIM_00060	CDS	64880	65974	1095	+	legI	2.5.1.101	COG2089	N,N'-diacetyllegionaminic acid synthase
AMODNKIM_00061	CDS	65975	66616	642	+	pglD	2.3.1.203	COG0110	UDP-N-acetylbacillosamine N-acetyltransferase
AMODNKIM_00062	CDS	66609	67664	1056	+	cugP	2.7.7.9		UTP--glucose-1-phosphate uridylyltransferase
AMODNKIM_00063	CDS	67666	68637	972	+	iolG	1.1.1.18	COG0673	Myo-inositol 2-dehydrogenase
AMODNKIM_00064	CDS	68648	69334	687	+	legF	2.7.7.82	COG1083	CMP-N,N'-diacetyllegionaminic acid synthase
AMODNKIM_00065	CDS	69338	70108	771	+	linX_1	1.1.1.-		2,5-dichloro-2,5-cyclohexadiene-1,4-diol dehydrogenase LinX
AMODNKIM_00066	CDS	70147	71430	1284	+				hypothetical protein
AMODNKIM_00067	CDS	71414	72499	1086	+				hypothetical protein
AMODNKIM_00068	CDS	72492	73763	1272	+				hypothetical protein
AMODNKIM_00069	CDS	73756	74790	1035	+	capD	5.1.3.2	COG1086	UDP-glucose 4-epimerase
AMODNKIM_00070	CDS	74793	75902	1110	+	wbjC	1.1.1.367		UDP-2-acetamido-2,6-beta-L-arabino-hexul-4-ose reductase
AMODNKIM_00071	CDS	75915	77045	1131	+	wbpI	5.1.3.23	COG0381	UDP-2,3-diacetamido-2,3-dideoxy-D-glucuronate 2-epimerase
AMODNKIM_00072	CDS	77056	78243	1188	+				hypothetical protein
AMODNKIM_00073	CDS	78260	78583	324	+				hypothetical protein
AMODNKIM_00074	CDS	78593	79195	603	+	gnu	5.1.3.26	COG0451	N-acetyl-alpha-D-glucosaminyl-diphospho-ditrans,octacis-undecaprenol 4-epimerase
AMODNKIM_00075	CDS	79206	79688	483	+	tagO	2.7.8.33	COG0472	putative undecaprenyl-phosphate N-acetylglucosaminyl 1-phosphate transferase
AMODNKIM_00076	CDS	79722	80291	570	+			COG3385	IS4 family transposase ISAba33
AMODNKIM_00077	CDS	80378	80812	435	+			COG3385	IS4 family transposase ISAba1
AMODNKIM_00078	CDS	80809	81405	597	+	mraY_1	2.7.8.13		Phospho-N-acetylmuramoyl-pentapeptide-transferase
AMODNKIM_00079	CDS	81822	82442	621	+	epsL	2.-.-.-	COG2148	putative sugar transferase EpsL
AMODNKIM_00080	CDS	82461	83336	876	+	galU	2.7.7.9	COG1210	UTP--glucose-1-phosphate uridylyltransferase
AMODNKIM_00081	CDS	83454	84716	1263	+				hypothetical protein
AMODNKIM_00082	CDS	84713	86383	1671	+	pgi	5.3.1.9	COG0166	Glucose-6-phosphate isomerase
AMODNKIM_00083	CDS	86376	87392	1017	+	galE_1	5.1.3.2	COG1087	UDP-glucose 4-epimerase
AMODNKIM_00084	CDS	87436	88806	1371	-	algC_1	5.4.2.2	COG1109	Phosphomannomutase/phosphoglucomutase
AMODNKIM_00085	CDS	89187	90848	1662	+	lldP		COG1620	L-lactate permease
AMODNKIM_00086	CDS	90868	91620	753	+	lldR		COG2186	Putative L-lactate dehydrogenase operon regulatory protein
AMODNKIM_00087	CDS	91617	92768	1152	+	lldD	1.1.-.-	COG1304	L-lactate dehydrogenase
AMODNKIM_00088	CDS	93060	94766	1707	+	dld	1.1.5.12	COG0277	Quinone-dependent D-lactate dehydrogenase
AMODNKIM_00089	CDS	94815	96029	1215	-	tyrB	2.6.1.57	COG1448	Aromatic-amino-acid aminotransferase
AMODNKIM_00090	CDS	96545	97255	711	+	gntR			putative D-xylose utilization operon transcriptional repressor
AMODNKIM_00091	CDS	97248	98132	885	+	prpB	4.1.3.30	COG2513	2-methylisocitrate lyase
AMODNKIM_00092	CDS	98392	99549	1158	+	prpC	2.3.3.5	COG0372	2-methylcitrate synthase
AMODNKIM_00093	CDS	99549	102155	2607	+	acnD	4.2.1.117	COG1048	2-methylcitrate dehydratase (2-methyl-trans-aconitate forming)
AMODNKIM_00094	CDS	102548	103486	939	+				hypothetical protein
AMODNKIM_00095	CDS	104067	104642	576	+				hypothetical protein
AMODNKIM_00096	CDS	105044	105553	510	+				hypothetical protein
AMODNKIM_00097	CDS	105795	106139	345	-	cdiI			Immunity protein CdiI
AMODNKIM_00098	CDS	106332	106616	285	-				hypothetical protein
AMODNKIM_00099	CDS	107289	107549	261	-				hypothetical protein
AMODNKIM_00100	CDS	107811	110624	2814	+				hypothetical protein
AMODNKIM_00101	CDS	110617	111711	1095	+				hypothetical protein
AMODNKIM_00102	CDS	111833	112624	792	+				hypothetical protein
AMODNKIM_00103	CDS	112699	114324	1626	-				IS66 family transposase ISAba17
AMODNKIM_00104	CDS	114399	114734	336	-				hypothetical protein
AMODNKIM_00105	CDS	114731	115159	429	-				hypothetical protein
AMODNKIM_00106	CDS	115253	115954	702	-		1.-.-.-		putative oxidoreductase
AMODNKIM_00107	CDS	116756	117457	702	+				hypothetical protein
AMODNKIM_00108	CDS	117569	118234	666	+	rluA_1	5.4.99.28	COG0564	Dual-specificity RNA pseudouridine synthase RluA
AMODNKIM_00109	CDS	118345	118719	375	+	rraB_1			Regulator of ribonuclease activity B
AMODNKIM_00110	CDS	118748	119128	381	+				hypothetical protein
AMODNKIM_00111	CDS	119173	121263	2091	-	cntO_1			Metal-pseudopaline receptor CntO
AMODNKIM_00112	CDS	121339	122484	1146	+				hypothetical protein
AMODNKIM_00113	CDS	122525	122992	468	-	lrp_1		COG1522	Leucine-responsive regulatory protein
AMODNKIM_00114	CDS	123129	124394	1266	+	dadA1	1.4.99.-	COG0665	D-amino acid dehydrogenase 1
AMODNKIM_00115	CDS	124415	125518	1104	+	dadX	5.1.1.1	COG0787	Alanine racemase, catabolic
AMODNKIM_00116	CDS	125529	125888	360	+	ridA	3.5.99.10	COG0251	2-iminobutanoate/2-iminopropanoate deaminase
AMODNKIM_00117	CDS	126051	127490	1440	+	cycA_1		COG1113	D-serine/D-alanine/glycine transporter
AMODNKIM_00118	CDS	127861	129291	1431	+	cycA_2		COG1113	D-serine/D-alanine/glycine transporter
AMODNKIM_00119	CDS	129349	130230	882	-	gltR_1		COG0583	HTH-type transcriptional regulator GltR
AMODNKIM_00120	CDS	130396	131913	1518	+	mmsA	1.2.1.27	COG1012	Methylmalonate-semialdehyde dehydrogenase [acylating]
AMODNKIM_00121	CDS	131925	132569	645	+	mmsB_1	1.1.1.31	COG2084	3-hydroxyisobutyrate dehydrogenase
AMODNKIM_00122	CDS	132613	133173	561	+			COG3385	IS4 family transposase ISAba33
AMODNKIM_00123	CDS	133170	133706	537	+			COG3385	IS4 family transposase ISAba33
AMODNKIM_00124	CDS	133762	134004	243	+	mmsB_2	1.1.1.31	COG2084	3-hydroxyisobutyrate dehydrogenase
AMODNKIM_00125	CDS	134086	135735	1650	+	acsA_1	6.2.1.1	COG0365	Acetyl-coenzyme A synthetase
AMODNKIM_00126	CDS	135747	136874	1128	+	mmgC_1	1.3.99.-	COG1960	Acyl-CoA dehydrogenase
AMODNKIM_00127	CDS	136896	137669	774	+	echA8_1	4.2.1.17	COG1024	putative enoyl-CoA hydratase echA8
AMODNKIM_00128	CDS	137682	138707	1026	+	fadJ_1	5.1.2.3		Fatty acid oxidation complex subunit alpha
AMODNKIM_00129	CDS	138826	139530	705	+	abaF_1			Fosfomycin resistance protein AbaF
AMODNKIM_00130	tRNA	139629	139704	76	-				tRNA-Gly(gcc)
AMODNKIM_00131	tRNA	139750	139825	76	-				tRNA-Gly(gcc)
AMODNKIM_00132	CDS	140056	140364	309	+	bolA		COG0271	DNA-binding transcriptional regulator BolA
AMODNKIM_00133	CDS	140376	140768	393	+				hypothetical protein
AMODNKIM_00134	CDS	140845	141687	843	+	parA			Chromosome partitioning protein ParA
AMODNKIM_00135	CDS	141698	142084	387	+				hypothetical protein
AMODNKIM_00136	CDS	142300	142890	591	+				hypothetical protein
AMODNKIM_00137	CDS	142898	143539	642	-	dedA_2		COG0586	Protein DedA
AMODNKIM_00138	CDS	143733	144170	438	+	yqjF		COG2259	Inner membrane protein YqjF
AMODNKIM_00139	CDS	144229	145458	1230	-				hypothetical protein
AMODNKIM_00140	CDS	145834	147402	1569	+	guaA_1	6.3.5.2	COG0518	GMP synthase [glutamine-hydrolyzing]
AMODNKIM_00141	CDS	147468	148256	789	+	ant1	2.7.7.47		Streptomycin 3''-adenylyltransferase
AMODNKIM_00142	CDS	148477	149004	528	+	yqjI		COG1695	Transcriptional regulator YqjI
AMODNKIM_00143	CDS	149065	149370	306	+				hypothetical protein
AMODNKIM_00144	CDS	149527	150474	948	+				hypothetical protein
AMODNKIM_00145	CDS	150471	150878	408	+				hypothetical protein
AMODNKIM_00146	CDS	150991	151659	669	+				hypothetical protein
AMODNKIM_00147	CDS	151703	152326	624	-	ftsN			Cell division protein FtsN
AMODNKIM_00148	CDS	152480	154270	1791	-	argS	6.1.1.19		Arginine--tRNA ligase
AMODNKIM_00149	CDS	154766	156463	1698	+	maeA	1.1.1.38	COG0281	NAD-dependent malic enzyme
AMODNKIM_00150	CDS	156707	157177	471	+				hypothetical protein
AMODNKIM_00151	CDS	157174	158106	933	+			COG3039	IS5 family transposase ISAba13
AMODNKIM_00152	CDS	158338	159258	921	-	yfeX_1	1.11.1.-	COG2837	Dye-decolorizing peroxidase YfeX
AMODNKIM_00153	CDS	159417	160043	627	+	rhtB_1		COG1280	Homoserine/homoserine lactone efflux protein
AMODNKIM_00154	CDS	160045	160854	810	-	znuB		COG1108	High-affinity zinc uptake system membrane protein ZnuB
AMODNKIM_00155	CDS	160858	161637	780	-	znuC	7.2.2.-	COG1121	Zinc import ATP-binding protein ZnuC
AMODNKIM_00156	CDS	161619	162116	498	-	zur		COG0735	Zinc uptake regulation protein
AMODNKIM_00157	CDS	162244	163083	840	+	znuA		COG4531	High-affinity zinc uptake system protein ZnuA
AMODNKIM_00158	CDS	163253	163651	399	+				hypothetical protein
AMODNKIM_00159	CDS	163756	164631	876	+	atpB		COG0356	ATP synthase subunit a
AMODNKIM_00160	CDS	164717	164962	246	+	atpE		COG0636	ATP synthase subunit c
AMODNKIM_00161	CDS	165001	165471	471	+	atpF		COG0711	ATP synthase subunit b
AMODNKIM_00162	CDS	165484	166020	537	+	atpH		COG0712	ATP synthase subunit delta
AMODNKIM_00163	CDS	166067	167611	1545	+	atpA	7.1.2.2	COG0056	ATP synthase subunit alpha
AMODNKIM_00164	CDS	167689	168558	870	+	atpG		COG0224	ATP synthase gamma chain
AMODNKIM_00165	CDS	168589	169983	1395	+	atpD1	7.1.2.2		ATP synthase subunit beta 1
AMODNKIM_00166	CDS	170001	170420	420	+	atpC		COG0355	ATP synthase epsilon chain
AMODNKIM_00167	CDS	170569	171051	483	+				hypothetical protein
AMODNKIM_00168	CDS	171100	171699	600	-				hypothetical protein
AMODNKIM_00169	CDS	171845	172390	546	-	btuE	1.11.1.15	COG0386	Thioredoxin/glutathione peroxidase BtuE
AMODNKIM_00170	CDS	172513	173277	765	-	nimR_1			HTH-type transcriptional regulator NimR
AMODNKIM_00171	CDS	173299	174513	1215	-	nepI		COG2814	Purine ribonucleoside efflux pump NepI
AMODNKIM_00172	CDS	174659	175300	642	+	comR			HTH-type transcriptional repressor ComR
AMODNKIM_00173	CDS	175418	176326	909	+				hypothetical protein
AMODNKIM_00174	CDS	176718	177287	570	-	tsaC	2.7.7.87	COG0009	Threonylcarbamoyl-AMP synthase
AMODNKIM_00175	CDS	177338	178489	1152	-				hypothetical protein
AMODNKIM_00176	CDS	178489	179643	1155	-				hypothetical protein
AMODNKIM_00177	CDS	179766	180296	531	+	def_1	3.5.1.88	COG0242	Peptide deformylase
AMODNKIM_00178	CDS	180333	180761	429	+				hypothetical protein
AMODNKIM_00179	CDS	180833	182947	2115	+	btuB_1			Vitamin B12 transporter BtuB
AMODNKIM_00180	CDS	183001	183207	207	+				hypothetical protein
AMODNKIM_00181	CDS	183277	184491	1215	-				hypothetical protein
AMODNKIM_00182	CDS	184580	185176	597	+	betI_1			HTH-type transcriptional regulator BetI
AMODNKIM_00183	rRNA	185673	187205	1533	+				16S ribosomal RNA
AMODNKIM_00184	tRNA	187266	187342	77	+				tRNA-Ile(gat)
AMODNKIM_00185	tRNA	187398	187473	76	+				tRNA-Ala(tgc)
AMODNKIM_00186	rRNA	187816	190705	2890	+				23S ribosomal RNA
AMODNKIM_00187	rRNA	190894	191004	111	+				5S ribosomal RNA
AMODNKIM_00188	CDS	191183	191725	543	+	aac	2.3.1.-		Aminoglycoside 2'-N-acetyltransferase
AMODNKIM_00189	CDS	191933	192931	999	+	srpG	2.5.1.47	COG0031	Cysteine synthase
AMODNKIM_00190	CDS	192987	193475	489	-	mltF_1	4.2.2.-		Membrane-bound lytic murein transglycosylase F
AMODNKIM_00191	CDS	193901	194467	567	-	fldP_1			Flavodoxin FldP
AMODNKIM_00192	CDS	194484	194969	486	-				hypothetical protein
AMODNKIM_00193	CDS	195051	195455	405	+	cueR		COG0789	HTH-type transcriptional regulator CueR
AMODNKIM_00194	CDS	195603	196862	1260	+				hypothetical protein
AMODNKIM_00195	CDS	197077	199455	2379	+				hypothetical protein
AMODNKIM_00196	CDS	199769	200269	501	+				hypothetical protein
AMODNKIM_00197	CDS	200415	200768	354	-			COG0251	RutC family protein
AMODNKIM_00198	CDS	201089	202144	1056	-	dinB	2.7.7.7	COG0389	DNA polymerase IV
AMODNKIM_00199	CDS	202146	202904	759	-				hypothetical protein
AMODNKIM_00200	CDS	202982	204373	1392	-	hsrA			putative transport protein HsrA
AMODNKIM_00201	CDS	204582	205205	624	-				hypothetical protein
AMODNKIM_00202	CDS	205532	207124	1593	+				hypothetical protein
AMODNKIM_00203	CDS	207196	207663	468	+				hypothetical protein
AMODNKIM_00204	CDS	207709	208353	645	+				hypothetical protein
AMODNKIM_00205	CDS	208436	209755	1320	+	naiP_1			Putative niacin/nicotinamide transporter NaiP
AMODNKIM_00206	CDS	209909	212128	2220	+	parC	5.6.2.2	COG0188	DNA topoisomerase 4 subunit A
AMODNKIM_00207	CDS	212426	214105	1680	+	fadD	6.2.1.3	COG0318	Long-chain-fatty-acid--CoA ligase
AMODNKIM_00208	CDS	214144	214527	384	-				hypothetical protein
AMODNKIM_00209	CDS	214634	215032	399	+				hypothetical protein
AMODNKIM_00210	CDS	215160	215687	528	+	ppa	3.6.1.1	COG0221	Inorganic pyrophosphatase
AMODNKIM_00211	CDS	215794	217110	1317	-	oprD	3.4.21.-		Porin D
AMODNKIM_00212	CDS	217808	217978	171	+				hypothetical protein
AMODNKIM_00213	CDS	218035	218847	813	+				hypothetical protein
AMODNKIM_00214	CDS	218890	219768	879	-	dapA_1	4.3.3.7	COG0329	4-hydroxy-tetrahydrodipicolinate synthase
AMODNKIM_00215	CDS	219784	220560	777	-	fucA	4.1.2.17		L-fuculose phosphate aldolase
AMODNKIM_00216	CDS	220672	221529	858	+	gabR_1		COG1167	HTH-type transcriptional regulatory protein GabR
AMODNKIM_00217	CDS	221570	222106	537	+	gabR_2		COG1167	HTH-type transcriptional regulatory protein GabR
AMODNKIM_00218	CDS	222121	222804	684	-	comM_1		COG0606	Competence protein ComM
AMODNKIM_00219	CDS	222929	223639	711	+				hypothetical protein
AMODNKIM_00220	CDS	223640	225550	1911	+				hypothetical protein
AMODNKIM_00221	CDS	225555	226193	639	+				hypothetical protein
AMODNKIM_00222	CDS	226568	226939	372	-				hypothetical protein
AMODNKIM_00223	CDS	227012	227311	300	-				hypothetical protein
AMODNKIM_00224	CDS	227379	228230	852	-				hypothetical protein
AMODNKIM_00225	CDS	228243	229730	1488	-	bicA_1		COG0659	Bicarbonate transporter BicA
AMODNKIM_00226	CDS	230025	231821	1797	-				hypothetical protein
AMODNKIM_00227	CDS	231904	233121	1218	-	tetA			Tetracycline resistance protein, class B
AMODNKIM_00228	CDS	233203	233826	624	+	tetR			Tetracycline repressor protein class B from transposon Tn10
AMODNKIM_00229	CDS	233804	234208	405	-				hypothetical protein
AMODNKIM_00230	CDS	234446	235939	1494	-				hypothetical protein
AMODNKIM_00231	CDS	236150	236374	225	-				hypothetical protein
AMODNKIM_00232	CDS	236494	237330	837	-				hypothetical protein
AMODNKIM_00233	CDS	237330	238175	846	-	neo_1	2.7.1.95		Aminoglycoside 3'-phosphotransferase
AMODNKIM_00234	CDS	238516	240303	1788	-				hypothetical protein
AMODNKIM_00235	CDS	240386	241243	858	-	comM_2		COG0606	Competence protein ComM
AMODNKIM_00236	CDS	241309	241536	228	-	ubiK			Ubiquinone biosynthesis accessory factor UbiK
AMODNKIM_00237	CDS	241816	242154	339	+	glnK		COG0347	Nitrogen regulatory protein P-II 2
AMODNKIM_00238	CDS	242212	243609	1398	+	amtB_1			Ammonia channel
AMODNKIM_00239	CDS	243767	244225	459	+	nrdR		COG1327	Transcriptional repressor NrdR
AMODNKIM_00240	CDS	244241	245326	1086	+	ribD		COG0117	Riboflavin biosynthesis protein RibD
AMODNKIM_00241	CDS	245323	246615	1293	+				hypothetical protein
AMODNKIM_00242	CDS	246658	247317	660	+	ribE	2.5.1.9		Riboflavin synthase
AMODNKIM_00243	CDS	247377	247595	219	-				hypothetical protein
AMODNKIM_00244	CDS	247726	248361	636	-				hypothetical protein
AMODNKIM_00245	CDS	248403	248810	408	-				hypothetical protein
AMODNKIM_00246	CDS	248803	250251	1449	-	pepA	3.4.11.10		cytosol aminopeptidase
AMODNKIM_00247	CDS	250395	251495	1101	+	lptF		COG0795	Lipopolysaccharide export system permease protein LptF
AMODNKIM_00248	CDS	251495	252565	1071	+	lptG		COG0795	Lipopolysaccharide export system permease protein LptG
AMODNKIM_00249	CDS	252691	254238	1548	+	gpmI	5.4.2.12	COG0696	2,3-bisphosphoglycerate-independent phosphoglycerate mutase
AMODNKIM_00250	CDS	254254	255438	1185	+		3.4.21.-		putative CtpA-like serine protease
AMODNKIM_00251	CDS	255442	256863	1422	-	atoC		COG2204	Regulatory protein AtoC
AMODNKIM_00252	CDS	256888	258456	1569	-	sasA_1	2.7.-.-		Adaptive-response sensory-kinase SasA
AMODNKIM_00253	CDS	258467	259102	636	-	gacA			Response regulator GacA
AMODNKIM_00254	CDS	259354	260361	1008	+				hypothetical protein
AMODNKIM_00255	CDS	260468	261607	1140	-	thrC	4.2.3.1	COG0498	Threonine synthase
AMODNKIM_00256	CDS	261663	262964	1302	-	hom	1.1.1.3	COG0460	Homoserine dehydrogenase
AMODNKIM_00257	CDS	263209	264024	816	-				hypothetical protein
AMODNKIM_00258	CDS	264171	265091	921	-	xerD		COG4974	Tyrosine recombinase XerD
AMODNKIM_00259	CDS	265199	265498	300	+				hypothetical protein
AMODNKIM_00260	CDS	265495	267348	1854	+	feoB		COG0370	Fe(2+) transporter FeoB
AMODNKIM_00261	CDS	267369	267620	252	+				hypothetical protein
AMODNKIM_00262	CDS	267781	269127	1347	+	murD	6.3.2.9	COG0771	UDP-N-acetylmuramoylalanine--D-glutamate ligase
AMODNKIM_00263	CDS	269152	270348	1197	+	ftsW	2.4.1.129	COG0772	putative peptidoglycan glycosyltransferase FtsW
AMODNKIM_00264	CDS	270398	271330	933	-	gluQ	6.1.1.-	COG0008	Glutamyl-Q tRNA(Asp) synthetase
AMODNKIM_00265	CDS	271333	271869	537	-	dksA		COG1734	RNA polymerase-binding transcription factor DksA
AMODNKIM_00266	CDS	272080	272892	813	-	cpdA_1	3.1.4.53	COG1409	3',5'-cyclic adenosine monophosphate phosphodiesterase CpdA
AMODNKIM_00267	CDS	272897	273523	627	-	nudF	3.6.1.13		ADP-ribose pyrophosphatase
AMODNKIM_00268	CDS	273599	275476	1878	-	thiC	4.1.99.17	COG0422	Phosphomethylpyrimidine synthase
AMODNKIM_00269	CDS	275735	276799	1065	-				hypothetical protein
AMODNKIM_00270	CDS	276925	277506	582	+				hypothetical protein
AMODNKIM_00271	CDS	277499	278404	906	+				hypothetical protein
AMODNKIM_00272	CDS	278485	279831	1347	+	tolC		COG1538	Outer membrane protein TolC
AMODNKIM_00273	CDS	279894	280661	768	+	phoU		COG0704	Phosphate-specific transport system accessory protein PhoU
AMODNKIM_00274	CDS	280975	281244	270	-			COG2924	putative Fe(2+)-trafficking protein
AMODNKIM_00275	CDS	281254	282633	1380	-	argH	4.3.2.1	COG0165	Argininosuccinate lyase
AMODNKIM_00276	CDS	282678	283817	1140	+				hypothetical protein
AMODNKIM_00277	CDS	283878	284618	741	+	btsR		COG3279	Transcriptional regulatory protein BtsR
AMODNKIM_00278	CDS	284707	285636	930	+	hemC	2.5.1.61	COG0181	Porphobilinogen deaminase
AMODNKIM_00279	CDS	285641	286408	768	+				hypothetical protein
AMODNKIM_00280	CDS	286417	287256	840	+				hypothetical protein
AMODNKIM_00281	CDS	287266	288459	1194	+				hypothetical protein
AMODNKIM_00282	CDS	288467	288907	441	+		3.1.-.-	COG0824	Putative esterase
AMODNKIM_00283	CDS	289102	289428	327	+	hvrA			Trans-acting regulatory protein HvrA
AMODNKIM_00284	CDS	289761	290504	744	+				hypothetical protein
AMODNKIM_00285	CDS	290504	291340	837	+				hypothetical protein
AMODNKIM_00286	CDS	291382	293658	2277	+	xcpQ		COG1450	Secretin XcpQ
AMODNKIM_00287	CDS	293699	294328	630	+				hypothetical protein
AMODNKIM_00288	CDS	294394	295062	669	+	gph	3.1.3.18	COG0546	Phosphoglycolate phosphatase
AMODNKIM_00289	CDS	295171	296664	1494	+	trpE	4.1.3.27	COG0147	Anthranilate synthase component 1
AMODNKIM_00290	tRNA	296764	296839	76	+				tRNA-Thr(tgt)
AMODNKIM_00291	tRNA	296896	296979	84	+				tRNA-Tyr(gta)
AMODNKIM_00292	tRNA	297017	297092	76	+				tRNA-Gly(tcc)
AMODNKIM_00293	tRNA	297106	297180	75	+				tRNA-Thr(ggt)
AMODNKIM_00294	CDS	297344	298534	1191	+	tufA_1		COG0050	Elongation factor Tu
AMODNKIM_00295	tRNA	298595	298670	76	+				tRNA-Trp(cca)
AMODNKIM_00296	CDS	298746	299186	441	+	secE			Protein translocase subunit SecE
AMODNKIM_00297	CDS	299194	299727	534	+	nusG		COG0250	Transcription termination/antitermination protein NusG
AMODNKIM_00298	CDS	299836	300264	429	+	rplK		COG0080	50S ribosomal protein L11
AMODNKIM_00299	CDS	300268	300963	696	+	rplA		COG0081	50S ribosomal protein L1
AMODNKIM_00300	CDS	301283	301789	507	+	rplJ		COG0244	50S ribosomal protein L10
AMODNKIM_00301	CDS	301832	302203	372	+	rplL			50S ribosomal protein L7/L12
AMODNKIM_00302	CDS	302509	306597	4089	+	rpoB	2.7.7.6	COG0085	DNA-directed RNA polymerase subunit beta
AMODNKIM_00303	CDS	306705	310877	4173	+	rpoC	2.7.7.6	COG0086	DNA-directed RNA polymerase subunit beta'
AMODNKIM_00304	CDS	311045	311410	366	+				hypothetical protein
AMODNKIM_00305	CDS	311624	311980	357	+				hypothetical protein
AMODNKIM_00306	CDS	312009	312506	498	-				hypothetical protein
AMODNKIM_00307	CDS	312630	313502	873	+	ephD	1.-.-.-	COG1028	putative oxidoreductase EphD
AMODNKIM_00308	CDS	313607	315031	1425	+				hypothetical protein
AMODNKIM_00309	CDS	315358	315939	582	+	ompW		COG3047	Outer membrane protein W
AMODNKIM_00310	CDS	316121	316477	357	+				hypothetical protein
AMODNKIM_00311	CDS	316580	318499	1920	+	htpG		COG0326	Chaperone protein HtpG
AMODNKIM_00312	CDS	318583	319485	903	-				hypothetical protein
AMODNKIM_00313	CDS	319607	320746	1140	-				hypothetical protein
AMODNKIM_00314	CDS	321105	321809	705	-				hypothetical protein
AMODNKIM_00315	CDS	321987	322745	759	+				hypothetical protein
AMODNKIM_00316	CDS	322766	323173	408	-	hmrR_1			HTH-type transcriptional regulator HmrR
AMODNKIM_00317	CDS	323291	323848	558	+	ydeN	3.-.-.-	COG3545	Putative hydrolase YdeN
AMODNKIM_00318	CDS	323917	324633	717	-				hypothetical protein
AMODNKIM_00319	CDS	324909	325400	492	+				hypothetical protein
AMODNKIM_00320	CDS	325445	326617	1173	-	fadA_1	2.3.1.16		3-ketoacyl-CoA thiolase
AMODNKIM_00321	CDS	326630	328783	2154	-	fadB			Fatty acid oxidation complex subunit alpha
AMODNKIM_00322	CDS	329355	330269	915	+				hypothetical protein
AMODNKIM_00323	CDS	330346	330435	90	-				hypothetical protein
AMODNKIM_00324	CDS	330617	330988	372	-				hypothetical protein
AMODNKIM_00325	CDS	331129	331659	531	+				hypothetical protein
AMODNKIM_00326	CDS	331784	333592	1809	+	uvrC		COG0322	UvrABC system protein C
AMODNKIM_00327	CDS	333713	334507	795	+				hypothetical protein
AMODNKIM_00328	CDS	334626	335213	588	+	pgsA	2.7.8.5	COG0558	CDP-diacylglycerol--glycerol-3-phosphate 3-phosphatidyltransferase
AMODNKIM_00329	CDS	335336	336190	855	+	ada		COG0350	Bifunctional transcriptional activator/DNA repair enzyme Ada
AMODNKIM_00330	CDS	336187	336798	612	+				hypothetical protein
AMODNKIM_00331	CDS	336993	337766	774	-	xynR		COG1414	HTH-type transcriptional regulator XynR
AMODNKIM_00332	CDS	338262	340361	2100	+	aaeB		COG1289	p-hydroxybenzoic acid efflux pump subunit AaeB
AMODNKIM_00333	CDS	340354	340560	207	+				hypothetical protein
AMODNKIM_00334	CDS	340600	341601	1002	+	aaeA_1		COG1566	p-hydroxybenzoic acid efflux pump subunit AaeA
AMODNKIM_00335	CDS	341658	342098	441	-	yqgF	3.1.-.-	COG0816	Putative pre-16S rRNA nuclease
AMODNKIM_00336	CDS	342098	342652	555	-				hypothetical protein
AMODNKIM_00337	CDS	342779	344446	1668	-	recN		COG0497	DNA repair protein RecN
AMODNKIM_00338	CDS	344561	345871	1311	+				hypothetical protein
AMODNKIM_00339	CDS	345948	346274	327	+	ppnP	2.4.2.2	COG3123	Pyrimidine/purine nucleoside phosphorylase
AMODNKIM_00340	CDS	346376	347125	750	+	rlmB_1	2.1.1.185	COG0566	23S rRNA (guanosine-2'-O-)-methyltransferase RlmB
AMODNKIM_00341	CDS	347161	348075	915	+				hypothetical protein
AMODNKIM_00342	CDS	348072	348668	597	-	coaE	2.7.1.24	COG0237	Dephospho-CoA kinase
AMODNKIM_00343	CDS	348670	349530	861	-	outO			Type 4 prepilin-like proteins leader peptide-processing enzyme
AMODNKIM_00344	CDS	349530	350756	1227	-	epsF_1		COG1459	Type II secretion system protein F
AMODNKIM_00345	CDS	350786	352498	1713	-	epsE_1		COG2804	Type II secretion system protein E
AMODNKIM_00346	CDS	352790	353584	795	+	tpiA	5.3.1.1		Triosephosphate isomerase
AMODNKIM_00347	CDS	353597	353926	330	+	secG		COG1314	Protein-export membrane protein SecG
AMODNKIM_00348	tRNA	353983	354067	85	+				tRNA-Leu(gag)
AMODNKIM_00349	tRNA	354110	354186	77	+				tRNA-Met(cat)
AMODNKIM_00350	tRNA	354276	354352	77	+				tRNA-Met(cat)
AMODNKIM_00351	CDS	354568	355092	525	+	rimP		COG0779	Ribosome maturation factor RimP
AMODNKIM_00352	CDS	355130	356614	1485	+	nusA		COG0195	Transcription termination/antitermination protein NusA
AMODNKIM_00353	CDS	356625	359324	2700	+	infB		COG0532	Translation initiation factor IF-2
AMODNKIM_00354	CDS	359324	359725	402	+	rbfA		COG0858	30S ribosome-binding factor
AMODNKIM_00355	CDS	359782	360186	405	-	mrpG		COG1320	Na(+)/H(+) antiporter subunit G
AMODNKIM_00356	CDS	360199	360474	276	-	mrpF		COG2212	Na(+)/H(+) antiporter subunit F
AMODNKIM_00357	CDS	360471	360998	528	-	mnhE1		COG1863	Na(+)/H(+) antiporter subunit E1
AMODNKIM_00358	CDS	361001	362812	1812	-	mrpD		COG0651	Na(+)/H(+) antiporter subunit D
AMODNKIM_00359	CDS	362812	363180	369	-	mnhC1		COG1006	Na(+)/H(+) antiporter subunit C1
AMODNKIM_00360	CDS	363177	366014	2838	-	ndhB	7.1.1.-		NAD(P)H-quinone oxidoreductase subunit 2, chloroplastic
AMODNKIM_00361	CDS	366341	367723	1383	-				hypothetical protein
AMODNKIM_00362	CDS	367747	369249	1503	-	rep_1	3.6.4.12		ATP-dependent DNA helicase Rep
AMODNKIM_00363	CDS	369259	370032	774	-	hisI	3.5.4.19		Histidine biosynthesis bifunctional protein HisIE
AMODNKIM_00364	CDS	370186	371499	1314	-	kmo	1.14.13.9		Kynurenine 3-monooxygenase
AMODNKIM_00365	CDS	371624	373243	1620	-	ubiB_1	2.7.-.-	COG0661	putative protein kinase UbiB
AMODNKIM_00366	CDS	373256	373924	669	-	ubiJ			Ubiquinone biosynthesis accessory factor UbiJ
AMODNKIM_00367	CDS	373936	374883	948	-	COQ5_1	2.1.1.163		2-methoxy-6-polyprenyl-1,4-benzoquinol methylase, mitochondrial
AMODNKIM_00368	CDS	375032	375739	708	-				hypothetical protein
AMODNKIM_00369	CDS	375947	377365	1419	+	pap	2.7.4.-	COG2326	Polyphosphate:AMP phosphotransferase
AMODNKIM_00370	CDS	377388	377894	507	-				hypothetical protein
AMODNKIM_00371	CDS	378066	381701	3636	+	recC	3.1.11.5	COG1330	RecBCD enzyme subunit RecC
AMODNKIM_00372	CDS	381705	385403	3699	+	recB	3.1.11.5		RecBCD enzyme subunit RecB
AMODNKIM_00373	CDS	385500	387263	1764	+	recD	3.1.11.5		RecBCD enzyme subunit RecD
AMODNKIM_00374	CDS	387980	389278	1299	-	amiE	3.5.1.28		N-acetylmuramyl-L-alanine amidase
AMODNKIM_00375	CDS	389491	389760	270	+	rpsO		COG0184	30S ribosomal protein S15
AMODNKIM_00376	CDS	390012	392105	2094	+	pnp	2.7.7.8		Polyribonucleotide nucleotidyltransferase
AMODNKIM_00377	CDS	392190	393401	1212	+				hypothetical protein
AMODNKIM_00378	CDS	393648	393977	330	-	cbpM			Chaperone modulatory protein CbpM
AMODNKIM_00379	CDS	393989	394945	957	-	cbpA		COG2214	Curved DNA-binding protein
AMODNKIM_00380	CDS	395096	395707	612	-	leuE_1		COG1280	Leucine efflux protein
AMODNKIM_00381	CDS	395846	396721	876	-	hslO		COG1281	33 kDa chaperonin
AMODNKIM_00382	CDS	396887	398728	1842	-	kefC_1		COG0475	Glutathione-regulated potassium-efflux system protein KefC
AMODNKIM_00383	CDS	398805	401033	2229	-	priA	3.6.4.-	COG1198	Primosomal protein N'
AMODNKIM_00384	CDS	401182	402387	1206	+	epsF_2		COG1459	Type II secretion system protein F
AMODNKIM_00385	CDS	402411	402992	582	+				hypothetical protein
AMODNKIM_00386	CDS	403259	403603	345	+				hypothetical protein
AMODNKIM_00387	CDS	403748	404086	339	+	csaA		COG0073	putative chaperone CsaA
AMODNKIM_00388	CDS	404088	405647	1560	-	lnt	2.3.1.269	COG0815	Apolipoprotein N-acyltransferase
AMODNKIM_00389	CDS	405644	406483	840	-	corC		COG4535	Magnesium and cobalt efflux protein CorC
AMODNKIM_00390	CDS	406668	406925	258	+	tusA_1		COG0425	Sulfur carrier protein TusA
AMODNKIM_00391	CDS	407021	408733	1713	-		1.5.5.1	COG0644	Electron transfer flavoprotein-ubiquinone oxidoreductase
AMODNKIM_00392	CDS	408920	409531	612	+				hypothetical protein
AMODNKIM_00393	CDS	409580	410446	867	+	murI	5.1.1.3		Glutamate racemase
AMODNKIM_00394	CDS	410567	411571	1005	+				hypothetical protein
AMODNKIM_00395	CDS	411645	412661	1017	+	hemH	4.99.1.1	COG0276	Ferrochelatase
AMODNKIM_00396	CDS	412685	413329	645	+	gloC	3.1.2.6	COG0491	Hydroxyacylglutathione hydrolase GloC
AMODNKIM_00397	CDS	413326	413520	195	-	yacG			DNA gyrase inhibitor YacG
AMODNKIM_00398	CDS	413614	414246	633	+	trmB_1	2.1.1.33	COG0220	tRNA (guanine-N(7)-)-methyltransferase
AMODNKIM_00399	CDS	414236	415441	1206	+	baiN	1.3.1.114	COG2081	3-dehydro-bile acid delta(4,6)-reductase
AMODNKIM_00400	CDS	415519	415929	411	+		4.4.1.22		Putative glutathione-dependent formaldehyde-activating enzyme
AMODNKIM_00401	CDS	416165	416545	381	+	crcB		COG0239	Putative fluoride ion transporter CrcB
AMODNKIM_00402	CDS	416974	417306	333	-				hypothetical protein
AMODNKIM_00403	CDS	417559	417813	255	-	rpmE2		COG0254	50S ribosomal protein L31 type B
AMODNKIM_00404	CDS	417914	419212	1299	-	ubiB_2	2.7.-.-		protein kinase UbiB
AMODNKIM_00405	CDS	419470	420717	1248	+	sfnC_1	1.14.14.-		putative FMNH2-dependent monooxygenase SfnC
AMODNKIM_00406	CDS	420751	422001	1251	+	sfnC_2	1.14.14.-		putative FMNH2-dependent monooxygenase SfnC
AMODNKIM_00407	CDS	422036	423382	1347	-	norM_1		COG0534	Multidrug resistance protein NorM
AMODNKIM_00408	CDS	423416	423877	462	-				hypothetical protein
AMODNKIM_00409	CDS	423995	425149	1155	+	hemW		COG0635	Heme chaperone HemW
AMODNKIM_00410	CDS	425200	425955	756	-	fabG_1	1.1.1.100		3-oxoacyl-[acyl-carrier-protein] reductase FabG
AMODNKIM_00411	CDS	426068	426964	897	+	pgrR_1			HTH-type transcriptional regulator PgrR
AMODNKIM_00412	tRNA	427028	427103	76	-				tRNA-Lys(ttt)
AMODNKIM_00413	tRNA	427126	427201	76	-				tRNA-Lys(ttt)
AMODNKIM_00414	CDS	427434	429275	1842	-		6.2.1.3	COG0318	Long-chain-fatty-acid--CoA ligase FadD17
AMODNKIM_00415	CDS	429468	432800	3333	-	rne	3.1.26.12		Ribonuclease E
AMODNKIM_00416	CDS	433523	434455	933	+	rluC	5.4.99.24	COG0564	Ribosomal large subunit pseudouridine synthase C
AMODNKIM_00417	CDS	434452	435126	675	+		3.1.3.5	COG0546	5'-nucleotidase
AMODNKIM_00418	CDS	435200	435895	696	+	birA_1	6.3.4.15		Bifunctional ligase/repressor BirA
AMODNKIM_00419	CDS	435945	436550	606	+				hypothetical protein
AMODNKIM_00420	CDS	436609	437286	678	-				hypothetical protein
AMODNKIM_00421	CDS	437550	438449	900	-	hcaR_1			Hca operon transcriptional activator HcaR
AMODNKIM_00422	CDS	439184	440236	1053	+			COG2220	putative protein
AMODNKIM_00423	CDS	440303	442459	2157	-	katG	1.11.1.21	COG0376	Catalase-peroxidase
AMODNKIM_00424	CDS	442973	445267	2295	-	ptsP	2.7.3.9	COG3605	Phosphoenolpyruvate-dependent phosphotransferase system
AMODNKIM_00425	CDS	445353	445838	486	-	rppH_1	3.6.1.-	COG0494	RNA pyrophosphohydrolase
AMODNKIM_00426	CDS	446021	446671	651	+		3.1.3.-	COG0560	putative phosphatase
AMODNKIM_00427	CDS	446726	447322	597	-				hypothetical protein
AMODNKIM_00428	CDS	447418	447654	237	+				hypothetical protein
AMODNKIM_00429	CDS	447660	448520	861	-	cmpR_1			HTH-type transcriptional activator CmpR
AMODNKIM_00430	CDS	448638	448892	255	-				hypothetical protein
AMODNKIM_00431	CDS	449130	450548	1419	+	leuC	4.2.1.33	COG0065	3-isopropylmalate dehydratase large subunit
AMODNKIM_00432	CDS	450567	451214	648	+	leuD	4.2.1.33	COG0066	3-isopropylmalate dehydratase small subunit
AMODNKIM_00433	CDS	451327	451917	591	+				hypothetical protein
AMODNKIM_00434	CDS	451949	453028	1080	+	leuB	1.1.1.85	COG0473	3-isopropylmalate dehydrogenase
AMODNKIM_00435	CDS	453082	453489	408	-				hypothetical protein
AMODNKIM_00436	CDS	453658	454026	369	+				hypothetical protein
AMODNKIM_00437	CDS	454078	454299	222	-	infA		COG0361	Translation initiation factor IF-1
AMODNKIM_00438	CDS	454563	455573	1011	+				putative HTH-type transcriptional regulator
AMODNKIM_00439	CDS	455593	456390	798	-	truA	5.4.99.12	COG0101	tRNA pseudouridine synthase A
AMODNKIM_00440	CDS	456405	457352	948	-				hypothetical protein
AMODNKIM_00441	CDS	457435	458697	1263	-				hypothetical protein
AMODNKIM_00442	CDS	458757	460121	1365	-				hypothetical protein
AMODNKIM_00443	CDS	460270	461388	1119	-	asd	1.2.1.11	COG0136	Aspartate-semialdehyde dehydrogenase
AMODNKIM_00444	CDS	461578	462699	1122	+				hypothetical protein
AMODNKIM_00445	CDS	463389	464675	1287	+	gltP_1		COG1301	Proton/glutamate-aspartate symporter
AMODNKIM_00446	CDS	464732	465832	1101	-	mshA_1	2.4.1.250		D-inositol-3-phosphate glycosyltransferase
AMODNKIM_00447	CDS	466098	467033	936	-	lpxL_1	2.3.1.241	COG1560	Lipid A biosynthesis lauroyltransferase
AMODNKIM_00448	CDS	467153	467785	633	-	leuE_2		COG1280	Leucine efflux protein
AMODNKIM_00449	CDS	467931	469841	1911	-	uup		COG0488	ABC transporter ATP-binding protein uup
AMODNKIM_00450	CDS	469874	470119	246	+	slyX			Protein SlyX
AMODNKIM_00451	CDS	470167	471177	1011	-				Zinc-type alcohol dehydrogenase-like protein
AMODNKIM_00452	CDS	471277	471654	378	+				hypothetical protein
AMODNKIM_00453	CDS	471802	472251	450	+				hypothetical protein
AMODNKIM_00454	CDS	472287	474923	2637	+	topA	5.6.2.1	COG0550	DNA topoisomerase 1
AMODNKIM_00455	CDS	475011	475769	759	+				hypothetical protein
AMODNKIM_00456	CDS	475907	476479	573	+				hypothetical protein
AMODNKIM_00457	CDS	476596	478575	1980	+	pcrA	3.6.4.12	COG0210	ATP-dependent DNA helicase PcrA
AMODNKIM_00458	CDS	478649	478888	240	+				hypothetical protein
AMODNKIM_00459	CDS	478896	479063	168	+				hypothetical protein
AMODNKIM_00460	CDS	479180	479683	504	+				hypothetical protein
AMODNKIM_00461	CDS	479796	480074	279	+				hypothetical protein
AMODNKIM_00462	CDS	480112	481821	1710	-	ybaL		COG1226	Putative cation/proton antiporter YbaL
AMODNKIM_00463	CDS	481969	482124	156	-	rpmG		COG0267	50S ribosomal protein L33
AMODNKIM_00464	CDS	482137	482373	237	-	rpmB		COG0227	50S ribosomal protein L28
AMODNKIM_00465	CDS	482541	483989	1449	-	calB_1	1.2.1.68		Coniferyl aldehyde dehydrogenase
AMODNKIM_00466	CDS	484102	484794	693	+	slmA			Nucleoid occlusion factor SlmA
AMODNKIM_00467	CDS	484869	485732	864	+	purU	3.5.1.10	COG0788	Formyltetrahydrofolate deformylase
AMODNKIM_00468	CDS	486124	486879	756	+				hypothetical protein
AMODNKIM_00469	CDS	486924	487544	621	+	tolQ_1			Tol-Pal system protein TolQ
AMODNKIM_00470	CDS	487544	487948	405	+	exbD_1		COG0848	Biopolymer transport protein ExbD
AMODNKIM_00471	CDS	488009	488530	522	-	msrA	1.8.4.11	COG0225	Peptide methionine sulfoxide reductase MsrA
AMODNKIM_00472	CDS	488631	489686	1056	-				hypothetical protein
AMODNKIM_00473	CDS	489701	490210	510	-	dhfrIII	1.5.1.3		Dihydrofolate reductase type 3
AMODNKIM_00474	CDS	490255	491097	843	-	thyA	2.1.1.45	COG0207	Thymidylate synthase
AMODNKIM_00475	CDS	491219	491581	363	-				hypothetical protein
AMODNKIM_00476	CDS	491592	491951	360	-				hypothetical protein
AMODNKIM_00477	CDS	492025	492843	819	-	lgt	2.5.1.145	COG0682	Phosphatidylglycerol--prolipoprotein diacylglyceryl transferase
AMODNKIM_00478	CDS	492937	493716	780	+				hypothetical protein
AMODNKIM_00479	CDS	493765	496098	2334	-				hypothetical protein
AMODNKIM_00480	CDS	496307	498487	2181	-				hypothetical protein
AMODNKIM_00481	CDS	498660	499430	771	-	tatC		COG0805	Sec-independent protein translocase protein TatC
AMODNKIM_00482	CDS	499427	499864	438	-	tatB		COG1826	Sec-independent protein translocase protein TatB
AMODNKIM_00483	CDS	499876	500094	219	-	tatA		COG1826	Sec-independent protein translocase protein TatA
AMODNKIM_00484	CDS	500347	501222	876	+				hypothetical protein
AMODNKIM_00485	CDS	501415	502041	627	-		3.6.1.66	COG0127	dITP/XTP pyrophosphatase
AMODNKIM_00486	CDS	502210	502797	588	-				hypothetical protein
AMODNKIM_00487	CDS	502794	503387	594	-	metXA		COG0500	Bifunctional methionine biosynthesis protein MetXA/MetW
AMODNKIM_00488	CDS	503387	504547	1161	-	metXS	2.3.1.46	COG2021	Homoserine O-succinyltransferase
AMODNKIM_00489	CDS	504631	506328	1698	-	leuA	2.3.3.13	COG0119	2-isopropylmalate synthase
AMODNKIM_00490	CDS	506787	507470	684	-		1.14.11.-	COG3128	PKHD-type hydroxylase
AMODNKIM_00491	CDS	507575	509806	2232	-	bfrD		COG4774	putative TonB-dependent receptor BfrD
AMODNKIM_00492	CDS	510221	511555	1335	+	tig	5.2.1.8	COG0544	Trigger factor
AMODNKIM_00493	CDS	511748	512353	606	+	clpP	3.4.21.92	COG0740	ATP-dependent Clp protease proteolytic subunit
AMODNKIM_00494	CDS	512455	513768	1314	+	clpX		COG1219	ATP-dependent Clp protease ATP-binding subunit ClpX
AMODNKIM_00495	CDS	513916	514632	717	+				hypothetical protein
AMODNKIM_00496	CDS	514657	515211	555	-				hypothetical protein
AMODNKIM_00497	CDS	515353	516879	1527	-	fumB	4.2.1.2	COG1838	Fumarate hydratase class I, anaerobic
AMODNKIM_00498	CDS	517107	519251	2145	-	pta	2.3.1.8	COG0280	Phosphate acetyltransferase
AMODNKIM_00499	CDS	519295	520557	1263	-	ackA	2.7.2.1	COG0282	Acetate kinase
AMODNKIM_00500	CDS	520741	521310	570	+			COG3385	IS4 family transposase ISAba33
AMODNKIM_00501	CDS	521397	521831	435	+			COG3385	IS4 family transposase ISAba1
AMODNKIM_00502	CDS	522449	524302	1854	+	edd	4.2.1.12	COG0129	Phosphogluconate dehydratase
AMODNKIM_00503	CDS	524323	524943	621	+	eda			KHG/KDPG aldolase
AMODNKIM_00504	CDS	525139	526497	1359	+	gntT		COG2610	High-affinity gluconate transporter
AMODNKIM_00505	CDS	526515	527027	513	+	gntK	2.7.1.12	COG3265	Thermoresistant gluconokinase
AMODNKIM_00506	CDS	527200	528828	1629	+	gapN	1.2.1.9	COG1012	NADP-dependent glyceraldehyde-3-phosphate dehydrogenase
AMODNKIM_00507	CDS	528935	530200	1266	-	proA	1.2.1.41		Gamma-glutamyl phosphate reductase
AMODNKIM_00508	CDS	530500	531813	1314	+	menH_1	4.2.99.20		2-succinyl-6-hydroxy-2,4-cyclohexadiene-1-carboxylate synthase
AMODNKIM_00509	CDS	531868	532710	843	-				hypothetical protein
AMODNKIM_00510	CDS	532795	533814	1020	-	nagZ	3.2.1.52	COG1472	Beta-hexosaminidase
AMODNKIM_00511	CDS	534007	536190	2184	+	prc	3.4.21.102	COG0793	Tail-specific protease
AMODNKIM_00512	CDS	536341	537627	1287	+	mshA_2	2.4.1.250		D-inositol-3-phosphate glycosyltransferase
AMODNKIM_00513	CDS	537652	538203	552	+				hypothetical protein
AMODNKIM_00514	CDS	538303	538503	201	+	iscX		COG2975	Protein IscX
AMODNKIM_00515	CDS	538617	539048	432	+	ndk	2.7.4.6		Nucleoside diphosphate kinase
AMODNKIM_00516	CDS	539171	540403	1233	+	rlmN	2.1.1.192	COG0820	Dual-specificity RNA methyltransferase RlmN
AMODNKIM_00517	CDS	540443	541219	777	+	lapB			Lipopolysaccharide assembly protein B
AMODNKIM_00518	CDS	541210	542001	792	+	rodZ			Cytoskeleton protein RodZ
AMODNKIM_00519	CDS	542023	543138	1116	+	ispG	1.17.7.3	COG0821	4-hydroxy-3-methylbut-2-en-1-yl diphosphate synthase (flavodoxin)
AMODNKIM_00520	CDS	543135	544427	1293	+	hisS	6.1.1.21		Histidine--tRNA ligase
AMODNKIM_00521	CDS	544456	545154	699	+				hypothetical protein
AMODNKIM_00522	CDS	545154	546299	1146	+	bamB		COG1520	Outer membrane protein assembly factor BamB
AMODNKIM_00523	CDS	546487	547896	1410	+	der		COG1160	GTPase Der
AMODNKIM_00524	CDS	548093	548707	615	+				hypothetical protein
AMODNKIM_00525	CDS	548701	549495	795	+				hypothetical protein
AMODNKIM_00526	CDS	549497	549757	261	+	acpP_1		COG0236	Acyl carrier protein
AMODNKIM_00527	CDS	549769	550017	249	+	acpM		COG0236	Meromycolate extension acyl carrier protein
AMODNKIM_00528	CDS	550014	550568	555	+	yciB_1			intracellular septation protein A
AMODNKIM_00529	CDS	550578	552236	1659	+	dltA_1	6.2.1.54		D-alanine--D-alanyl carrier protein ligase
AMODNKIM_00530	CDS	552239	552979	741	+		2.4.1.54		Undecaprenyl-phosphate mannosyltransferase
AMODNKIM_00531	CDS	552982	553908	927	+	lpxL_2	2.3.1.241		Lipid A biosynthesis lauroyltransferase
AMODNKIM_00532	CDS	553910	555445	1536	+	hutH_1	4.3.1.3		Histidine ammonia-lyase
AMODNKIM_00533	CDS	555455	555883	429	+		3.1.2.28		1,4-dihydroxy-2-naphthoyl-CoA hydrolase
AMODNKIM_00534	CDS	555883	556512	630	+	lolA_1			Outer-membrane lipoprotein carrier protein
AMODNKIM_00535	CDS	556553	558802	2250	+				hypothetical protein
AMODNKIM_00536	CDS	558832	560127	1296	+	ctcP	1.14.19.49		Tetracycline 7-halogenase
AMODNKIM_00537	CDS	560130	560675	546	+				hypothetical protein
AMODNKIM_00538	CDS	560672	561874	1203	+				hypothetical protein
AMODNKIM_00539	CDS	561874	562299	426	+				hypothetical protein
AMODNKIM_00540	CDS	562323	563048	726	+	fabG_2	1.1.1.100		3-oxoacyl-[acyl-carrier-protein] reductase FabG
AMODNKIM_00541	CDS	563048	564274	1227	+	fabB_1	2.3.1.41		3-oxoacyl-[acyl-carrier-protein] synthase 1
AMODNKIM_00542	CDS	564286	564720	435	+				hypothetical protein
AMODNKIM_00543	CDS	564745	565401	657	+				hypothetical protein
AMODNKIM_00544	CDS	565470	565928	459	-	secB		COG1952	Protein-export protein SecB
AMODNKIM_00545	CDS	565956	566213	258	-	grxC		COG0695	Glutaredoxin 3
AMODNKIM_00546	CDS	566225	566641	417	-	yibN		COG0607	putative protein YibN
AMODNKIM_00547	CDS	566739	567797	1059	-	rsgA	3.6.1.-	COG1162	Small ribosomal subunit biogenesis GTPase RsgA
AMODNKIM_00548	CDS	567923	568489	567	+	orn	3.1.-.-	COG1949	Oligoribonuclease
AMODNKIM_00549	CDS	568645	569376	732	+				hypothetical protein
AMODNKIM_00550	CDS	569513	570316	804	+	fabI	1.3.1.9	COG0623	Enoyl-[acyl-carrier-protein] reductase [NADH] FabI
AMODNKIM_00551	CDS	570386	571792	1407	-	tdeA		COG1538	Toxin and drug export protein A
AMODNKIM_00552	CDS	571803	573797	1995	-	macB	3.6.3.-	COG0577	Macrolide export ATP-binding/permease protein MacB
AMODNKIM_00553	CDS	573800	575140	1341	-	macA		COG0845	Macrolide export protein MacA
AMODNKIM_00554	CDS	575248	576237	990	-	holA	2.7.7.7	COG1466	DNA polymerase III subunit delta
AMODNKIM_00555	CDS	576257	576766	510	-	lptE			LPS-assembly lipoprotein LptE
AMODNKIM_00556	CDS	576794	579418	2625	-	leuS	6.1.1.4		Leucine--tRNA ligase
AMODNKIM_00557	CDS	579605	579934	330	-				hypothetical protein
AMODNKIM_00558	CDS	580439	582163	1725	+	ilvI	2.2.1.6	COG0028	Acetolactate synthase isozyme 3 large subunit
AMODNKIM_00559	CDS	582163	582654	492	+	ilvH	2.2.1.6	COG0440	Acetolactate synthase isozyme 3 small subunit
AMODNKIM_00560	CDS	582687	583703	1017	+	ilvC	1.1.1.86	COG0059	Ketol-acid reductoisomerase (NADP(+))
AMODNKIM_00561	CDS	584034	586088	2055	+			COG2200	putative signaling protein
AMODNKIM_00562	CDS	586693	587256	564	+				hypothetical protein
AMODNKIM_00563	CDS	587474	588061	588	-	betI_2			HTH-type transcriptional regulator BetI
AMODNKIM_00564	CDS	588377	589240	864	+				hypothetical protein
AMODNKIM_00565	CDS	589445	591037	1593	+	prfC		COG4108	Peptide chain release factor RF3
AMODNKIM_00566	CDS	591107	591949	843	+				hypothetical protein
AMODNKIM_00567	CDS	592034	592978	945	+				hypothetical protein
AMODNKIM_00568	CDS	592978	593790	813	+	yjjV	3.1.-.-	COG0084	putative metal-dependent hydrolase YjjV
AMODNKIM_00569	CDS	593915	596671	2757	+	acnA	4.2.1.3	COG1048	Aconitate hydratase A
AMODNKIM_00570	CDS	596792	597265	474	+				hypothetical protein
AMODNKIM_00571	CDS	597390	598154	765	+	tcdA	6.1.-.-	COG1179	tRNA threonylcarbamoyladenosine dehydratase
AMODNKIM_00572	CDS	598442	599335	894	+	benM_1			HTH-type transcriptional regulator BenM
AMODNKIM_00573	CDS	599343	599852	510	-				hypothetical protein
AMODNKIM_00574	CDS	600188	601192	1005	-	dusA	1.3.1.-	COG0042	tRNA-dihydrouridine(20/20a) synthase
AMODNKIM_00575	CDS	601341	602525	1185	-				putative transporter
AMODNKIM_00576	CDS	602544	602951	408	-				hypothetical protein
AMODNKIM_00577	CDS	603019	603945	927	-				hypothetical protein
AMODNKIM_00578	CDS	604185	605312	1128	+	pntAA	7.1.1.1	COG3288	NAD(P) transhydrogenase subunit alpha part 1
AMODNKIM_00579	CDS	605324	605638	315	+	pntA	7.1.1.1	COG3288	NAD(P) transhydrogenase subunit alpha
AMODNKIM_00580	CDS	605651	607105	1455	+	pntB	7.1.1.1	COG1282	NAD(P) transhydrogenase subunit beta
AMODNKIM_00581	CDS	607158	607979	822	-	hcaB_1	1.3.1.87		3-phenylpropionate-dihydrodiol/cinnamic acid-dihydrodiol dehydrogenase
AMODNKIM_00582	CDS	608231	608632	402	-	rsfS			Ribosomal silencing factor RsfS
AMODNKIM_00583	CDS	608714	609508	795	-	hyi	5.3.1.22	COG3622	Hydroxypyruvate isomerase
AMODNKIM_00584	CDS	609525	610391	867	-	glxR_1	1.1.1.60	COG2084	2-hydroxy-3-oxopropionate reductase
AMODNKIM_00585	CDS	610402	611190	789	-	crt	4.2.1.150	COG1024	Short-chain-enoyl-CoA hydratase
AMODNKIM_00586	CDS	611287	614094	2808	-	rcsC_1	2.7.13.3		Sensor histidine kinase RcsC
AMODNKIM_00587	CDS	614267	615181	915	+	cysM	2.5.1.47	COG0031	Cysteine synthase B
AMODNKIM_00588	CDS	615204	616022	819	+				hypothetical protein
AMODNKIM_00589	CDS	616032	617423	1392	+	rlmD	2.1.1.190	COG2265	23S rRNA (uracil(1939)-C(5))-methyltransferase RlmD
AMODNKIM_00590	CDS	617454	619760	2307	+	relA	2.7.6.5	COG0317	GTP pyrophosphokinase
AMODNKIM_00591	CDS	619805	620578	774	-	linX_2	1.1.1.-		2,5-dichloro-2,5-cyclohexadiene-1,4-diol dehydrogenase LinX
AMODNKIM_00592	CDS	620690	621496	807	+	mazG	3.6.1.8	COG1694	Nucleoside triphosphate pyrophosphohydrolase
AMODNKIM_00593	CDS	621465	621875	411	+			COG1555	putative protein
AMODNKIM_00594	CDS	622000	623463	1464	+	pcnB	2.7.7.19	COG0617	Poly(A) polymerase I
AMODNKIM_00595	CDS	623460	623942	483	+	folK	2.7.6.3	COG0801	2-amino-4-hydroxy-6-hydroxymethyldihydropteridine pyrophosphokinase
AMODNKIM_00596	CDS	623988	624797	810	+	panB	2.1.2.11	COG0413	3-methyl-2-oxobutanoate hydroxymethyltransferase
AMODNKIM_00597	CDS	624801	625649	849	+	panC	6.3.2.1	COG0414	Pantothenate synthetase
AMODNKIM_00598	CDS	625672	626523	852	+	rapZ		COG1660	RNase adapter protein RapZ
AMODNKIM_00599	CDS	626478	626789	312	+	ptsO		COG1925	Phosphocarrier protein NPr
AMODNKIM_00600	CDS	626792	627328	537	+				hypothetical protein
AMODNKIM_00601	CDS	627390	629018	1629	-		6.2.1.3	COG0318	Long-chain-fatty-acid--CoA ligase
AMODNKIM_00602	CDS	629430	631352	1923	+	thrS	6.1.1.3	COG0441	Threonine--tRNA ligase
AMODNKIM_00603	CDS	631589	631909	321	+	infC		COG0290	Translation initiation factor IF-3
AMODNKIM_00604	CDS	632115	632735	621	+	yfcG_1	1.8.4.-	COG0625	Disulfide-bond oxidoreductase YfcG
AMODNKIM_00605	CDS	632788	633216	429	+	yqaA		COG1238	Inner membrane protein YqaA
AMODNKIM_00606	CDS	633256	634506	1251	-	entS		COG0477	Enterobactin exporter EntS
AMODNKIM_00607	CDS	634755	634949	195	+	rpmI		COG0291	50S ribosomal protein L35
AMODNKIM_00608	CDS	634961	635320	360	+	rplT		COG0292	50S ribosomal protein L20
AMODNKIM_00609	CDS	635411	635968	558	+				hypothetical protein
AMODNKIM_00610	CDS	636027	636530	504	+				hypothetical protein
AMODNKIM_00611	CDS	636537	637538	1002	-				hypothetical protein
AMODNKIM_00612	CDS	637696	638676	981	+	pheS	6.1.1.20	COG0016	Phenylalanine--tRNA ligase alpha subunit
AMODNKIM_00613	CDS	638710	641091	2382	+	pheT	6.1.1.20	COG0072	Phenylalanine--tRNA ligase beta subunit
AMODNKIM_00614	CDS	641088	641384	297	+	ihfA		COG0776	Integration host factor subunit alpha
AMODNKIM_00615	CDS	641554	641799	246	-				hypothetical protein
AMODNKIM_00616	CDS	642214	643482	1269	-	rho	3.6.4.-	COG1158	Transcription termination factor Rho
AMODNKIM_00617	CDS	643804	644130	327	-				Thioredoxin C-2
AMODNKIM_00618	CDS	644410	645930	1521	+	ppx	3.6.1.11	COG0248	Exopolyphosphatase
AMODNKIM_00619	CDS	645949	646770	822	+	accA_1	2.1.3.15	COG0825	Acetyl-coenzyme A carboxylase carboxyl transferase subunit alpha
AMODNKIM_00620	CDS	646827	648110	1284	+	tilS	6.3.4.19	COG0037	tRNA(Ile)-lysidine synthase
AMODNKIM_00621	CDS	648088	648918	831	+	proC_1	1.5.1.2	COG0345	Pyrroline-5-carboxylate reductase
AMODNKIM_00622	CDS	648940	649509	570	+				hypothetical protein
AMODNKIM_00623	CDS	649569	652340	2772	-	polA	2.7.7.7	COG0258	DNA polymerase I
AMODNKIM_00624	CDS	652495	652749	255	+				hypothetical protein
AMODNKIM_00625	CDS	652783	653352	570	+			COG3385	IS4 family transposase ISAba33
AMODNKIM_00626	CDS	653439	653873	435	+			COG3385	IS4 family transposase ISAba1
AMODNKIM_00627	CDS	653870	656491	2622	+				hypothetical protein
AMODNKIM_00628	CDS	656481	657398	918	-	mscS		COG0668	Small-conductance mechanosensitive channel
AMODNKIM_00629	CDS	657408	658229	822	-				hypothetical protein
AMODNKIM_00630	CDS	658326	659816	1491	+	epsE_2		COG2804	Type II secretion system protein E
AMODNKIM_00631	CDS	659871	660302	432	-	ohrB		COG1764	Organic hydroperoxide resistance protein OhrB
AMODNKIM_00632	CDS	660390	660827	438	-	ohrR_1			Organic hydroperoxide resistance transcriptional regulator
AMODNKIM_00633	CDS	660988	661365	378	-				hypothetical protein
AMODNKIM_00634	CDS	661380	662204	825	-	nit1	3.5.1.128		Deaminated glutathione amidase
AMODNKIM_00635	CDS	662231	662752	522	-				hypothetical protein
AMODNKIM_00636	CDS	662855	663823	969	-				hypothetical protein
AMODNKIM_00637	CDS	663939	664838	900	-				hypothetical protein
AMODNKIM_00638	rRNA	665413	666945	1533	+				16S ribosomal RNA
AMODNKIM_00639	tRNA	667006	667082	77	+				tRNA-Ile(gat)
AMODNKIM_00640	tRNA	667138	667213	76	+				tRNA-Ala(tgc)
AMODNKIM_00641	rRNA	667556	670445	2890	+				23S ribosomal RNA
AMODNKIM_00642	rRNA	670634	670744	111	+				5S ribosomal RNA
AMODNKIM_00643	CDS	670996	672444	1449	+	rpoN		COG1508	RNA polymerase sigma-54 factor
AMODNKIM_00644	CDS	672613	672951	339	+	hpf		COG1544	Ribosome hibernation promoting factor
AMODNKIM_00645	CDS	673091	673342	252	+			COG5007	putative protein
AMODNKIM_00646	CDS	673349	674605	1257	+	murA	2.5.1.7	COG0766	UDP-N-acetylglucosamine 1-carboxyvinyltransferase
AMODNKIM_00647	CDS	674605	675288	684	+	hisG	2.4.2.17	COG0040	ATP phosphoribosyltransferase
AMODNKIM_00648	CDS	675361	676683	1323	+	hisD	1.1.1.23	COG0141	Histidinol dehydrogenase
AMODNKIM_00649	CDS	676753	677838	1086	+	hisC	2.6.1.9	COG0079	Histidinol-phosphate aminotransferase
AMODNKIM_00650	CDS	677842	679230	1389	-	menF	5.4.4.2		Isochorismate synthase MenF
AMODNKIM_00651	CDS	679549	680394	846	+				hypothetical protein
AMODNKIM_00652	CDS	680725	681126	402	+				hypothetical protein
AMODNKIM_00653	CDS	681136	681528	393	+				hypothetical protein
AMODNKIM_00654	CDS	681573	682754	1182	+				hypothetical protein
AMODNKIM_00655	CDS	682767	684431	1665	+				hypothetical protein
AMODNKIM_00656	CDS	684425	685711	1287	+				hypothetical protein
AMODNKIM_00657	CDS	685731	687680	1950	+				hypothetical protein
AMODNKIM_00658	CDS	687736	688293	558	-	nudC_1	3.6.1.22		NADH pyrophosphatase
AMODNKIM_00659	CDS	688408	689025	618	+	nudL	3.6.1.-		putative Nudix hydrolase NudL
AMODNKIM_00660	CDS	689045	689575	531	+	yrdA_1		COG0663	Protein YrdA
AMODNKIM_00661	CDS	689708	690373	666	+	tsaB		COG1214	tRNA threonylcarbamoyladenosine biosynthesis protein TsaB
AMODNKIM_00662	CDS	690385	691176	792	+	rsmJ	2.1.1.242		Ribosomal RNA small subunit methyltransferase J
AMODNKIM_00663	CDS	691313	692764	1452	+				hypothetical protein
AMODNKIM_00664	CDS	692733	693578	846	+	fghA	3.1.2.12	COG0627	S-formylglutathione hydrolase
AMODNKIM_00665	CDS	693584	693856	273	-				hypothetical protein
AMODNKIM_00666	CDS	694041	694727	687	+	rpe	5.1.3.1	COG0036	Ribulose-phosphate 3-epimerase
AMODNKIM_00667	CDS	695084	695905	822	+	ybiV	3.1.3.23	COG0561	Sugar phosphatase YbiV
AMODNKIM_00668	CDS	696004	696402	399	+				hypothetical protein
AMODNKIM_00669	CDS	696443	698377	1935	+	copA			Copper resistance protein A
AMODNKIM_00670	CDS	698364	699119	756	+				hypothetical protein
AMODNKIM_00671	CDS	699148	700143	996	+	zitB			Zinc transporter ZitB
AMODNKIM_00672	CDS	700293	700613	321	+	gdx			Guanidinium exporter
AMODNKIM_00673	CDS	700625	701104	480	+	ogt	2.1.1.63	COG0350	Methylated-DNA--protein-cysteine methyltransferase
AMODNKIM_00674	CDS	701241	702461	1221	+	argJ			Arginine biosynthesis bifunctional protein ArgJ
AMODNKIM_00675	CDS	702608	703672	1065	+	nadA	2.5.1.72	COG0379	Quinolinate synthase A
AMODNKIM_00676	tRNA	703815	703891	77	+				tRNA-Pro(tgg)
AMODNKIM_00677	tRNA	703948	704024	77	+				tRNA-Arg(tct)
AMODNKIM_00678	tRNA	704058	704133	76	+				tRNA-His(gtg)
AMODNKIM_00679	tRNA	704138	704214	77	+				tRNA-Pro(tgg)
AMODNKIM_00680	CDS	704454	705473	1020	-	add	3.5.4.4	COG1816	Adenosine deaminase
AMODNKIM_00681	CDS	705851	707026	1176	+	tdh_1	1.1.1.103		L-threonine 3-dehydrogenase
AMODNKIM_00682	CDS	707131	708078	948	-	gcvA_1			Glycine cleavage system transcriptional activator
AMODNKIM_00683	CDS	708324	709544	1221	+	mmgC_2	1.3.99.-	COG1960	Acyl-CoA dehydrogenase
AMODNKIM_00684	CDS	709770	711092	1323	+	yjhB_1			Putative metabolite transport protein YjhB
AMODNKIM_00685	CDS	711145	712374	1230	+	uctC_1	2.8.3.19		Acetyl-CoA:oxalate CoA-transferase
AMODNKIM_00686	CDS	712479	713612	1134	-				hypothetical protein
AMODNKIM_00687	CDS	713602	715008	1407	-	ifcA	1.3.5.4	COG1053	Fumarate reductase flavoprotein subunit
AMODNKIM_00688	CDS	715112	716041	930	-	argP			HTH-type transcriptional regulator ArgP
AMODNKIM_00689	CDS	716174	716968	795	-	ais	5.3.3.7		Aconitate isomerase
AMODNKIM_00690	CDS	717061	718371	1311	-	proP_1			Proline/betaine transporter
AMODNKIM_00691	CDS	718650	719579	930	-	hdfR_1			HTH-type transcriptional regulator HdfR
AMODNKIM_00692	CDS	719879	721264	1386	+				hypothetical protein
AMODNKIM_00693	CDS	721298	722665	1368	+		3.5.1.47		N-acetyldiaminopimelate deacetylase
AMODNKIM_00694	CDS	722722	723729	1008	-				putative HTH-type transcriptional regulator
AMODNKIM_00695	CDS	723915	724970	1056	+				hypothetical protein
AMODNKIM_00696	CDS	725072	725680	609	-	leuE_3		COG1280	Leucine efflux protein
AMODNKIM_00697	CDS	725936	726808	873	+	gcvA_2			Glycine cleavage system transcriptional activator
AMODNKIM_00698	CDS	727175	728161	987	+				hypothetical protein
AMODNKIM_00699	CDS	728183	729226	1044	+	xecA1	4.4.1.23		2-hydroxypropyl-CoM lyase
AMODNKIM_00700	CDS	729412	729903	492	+	rutF	1.5.1.42	COG1853	FMN reductase (NADH) RutF
AMODNKIM_00701	CDS	730481	731140	660	+	betI_3			HTH-type transcriptional regulator BetI
AMODNKIM_00702	CDS	731316	734003	2688	+				hypothetical protein
AMODNKIM_00703	CDS	734132	734401	270	+				hypothetical protein
AMODNKIM_00704	CDS	734585	735448	864	-	hdfR_2			HTH-type transcriptional regulator HdfR
AMODNKIM_00705	CDS	735673	736566	894	+	yddE_1	5.1.-.-	COG0384	putative isomerase YddE
AMODNKIM_00706	CDS	736881	739805	2925	-				hypothetical protein
AMODNKIM_00707	CDS	740870	741229	360	+				hypothetical protein
AMODNKIM_00708	CDS	741269	742114	846	+				hypothetical protein
AMODNKIM_00709	CDS	742299	744710	2412	-	quiA_1	1.1.5.8	COG4993	Quinate/shikimate dehydrogenase (quinone)
AMODNKIM_00710	CDS	745015	745359	345	+				hypothetical protein
AMODNKIM_00711	CDS	746015	747019	1005	+				hypothetical protein
AMODNKIM_00712	CDS	747016	747528	513	-				hypothetical protein
AMODNKIM_00713	CDS	747852	748031	180	+				hypothetical protein
AMODNKIM_00714	CDS	748106	750112	2007	-				hypothetical protein
AMODNKIM_00715	CDS	750112	751062	951	-				hypothetical protein
AMODNKIM_00716	CDS	751055	752941	1887	-				hypothetical protein
AMODNKIM_00717	CDS	752943	753644	702	-				hypothetical protein
AMODNKIM_00718	CDS	753852	754079	228	-				hypothetical protein
AMODNKIM_00719	CDS	754435	755352	918	+				hypothetical protein
AMODNKIM_00720	CDS	755345	758653	3309	+				hypothetical protein
AMODNKIM_00721	CDS	758650	759492	843	+				hypothetical protein
AMODNKIM_00722	CDS	760035	760463	429	+				hypothetical protein
AMODNKIM_00723	CDS	760460	760795	336	+				hypothetical protein
AMODNKIM_00724	CDS	760870	762495	1626	+				IS66 family transposase ISAba17
AMODNKIM_00725	CDS	762492	763988	1497	-				hypothetical protein
AMODNKIM_00726	CDS	763990	766329	2340	-				hypothetical protein
AMODNKIM_00727	CDS	767135	768418	1284	-	nrdB	1.17.4.1	COG0208	Ribonucleoside-diphosphate reductase subunit beta
AMODNKIM_00728	CDS	768556	768690	135	-				hypothetical protein
AMODNKIM_00729	CDS	768746	771580	2835	-				hypothetical protein
AMODNKIM_00730	CDS	772113	772829	717	+	rstA		COG0745	Transcriptional regulatory protein RstA
AMODNKIM_00731	CDS	772862	774511	1650	+	sasA_2	2.7.-.-		Adaptive-response sensory-kinase SasA
AMODNKIM_00732	CDS	774534	774887	354	-				hypothetical protein
AMODNKIM_00733	CDS	774980	776401	1422	-				hypothetical protein
AMODNKIM_00734	CDS	776829	777380	552	+	ndhC	7.1.1.-		NAD(P)H-quinone oxidoreductase subunit 3, chloroplastic
AMODNKIM_00735	CDS	777387	778064	678	+	nuoB	7.1.1.-	COG0377	NADH-quinone oxidoreductase subunit B
AMODNKIM_00736	CDS	778149	779936	1788	+	nuoC	7.1.1.-	COG0649	NADH-quinone oxidoreductase subunit C/D
AMODNKIM_00737	CDS	779950	780459	510	+	nuoE	7.1.1.-	COG1905	NADH-quinone oxidoreductase subunit E
AMODNKIM_00738	CDS	780456	781787	1332	+	nuoF	7.1.1.-	COG1894	NADH-quinone oxidoreductase subunit F
AMODNKIM_00739	CDS	781799	784483	2685	+	nuoG	7.1.1.-	COG1034	NADH-quinone oxidoreductase subunit G
AMODNKIM_00740	CDS	784487	785503	1017	+	nuoH	7.1.1.-	COG1005	NADH-quinone oxidoreductase subunit H
AMODNKIM_00741	CDS	785522	786064	543	+	nuoI	7.1.1.-	COG1143	NADH-quinone oxidoreductase subunit I
AMODNKIM_00742	CDS	786061	786582	522	+	nuoJ	7.1.1.-	COG0839	NADH-quinone oxidoreductase subunit J
AMODNKIM_00743	CDS	786582	786890	309	+	nuoK	7.1.1.-	COG0713	NADH-quinone oxidoreductase subunit K
AMODNKIM_00744	CDS	786887	788776	1890	+	nuoL	7.1.1.-	COG1009	NADH-quinone oxidoreductase subunit L
AMODNKIM_00745	CDS	788778	790376	1599	+	nuoM	7.1.1.-	COG1008	NADH-quinone oxidoreductase subunit M
AMODNKIM_00746	CDS	790379	791875	1497	+	nuoN	7.1.1.-	COG1007	NADH-quinone oxidoreductase subunit N
AMODNKIM_00747	CDS	791976	792611	636	+	upp	2.4.2.9	COG0035	Uracil phosphoribosyltransferase
AMODNKIM_00748	CDS	792728	793021	294	+				hypothetical protein
AMODNKIM_00749	CDS	793041	793928	888	-	cmpR_2			HTH-type transcriptional activator CmpR
AMODNKIM_00750	CDS	794015	794776	762	+	fpr_1	1.18.1.2	COG1018	Flavodoxin/ferredoxin--NADP reductase
AMODNKIM_00751	CDS	794824	795246	423	-				hypothetical protein
AMODNKIM_00752	CDS	795536	795763	228	+				hypothetical protein
AMODNKIM_00753	CDS	795991	797667	1677	+				hypothetical protein
AMODNKIM_00754	CDS	797796	797966	171	+				hypothetical protein
AMODNKIM_00755	CDS	797979	799178	1200	-			COG2081	putative protein
AMODNKIM_00756	CDS	799296	800177	882	-	dcyD	4.4.1.15	COG2515	D-cysteine desulfhydrase
AMODNKIM_00757	CDS	800244	801377	1134	-	emrA_1			Colistin resistance protein EmrA
AMODNKIM_00758	CDS	801418	803061	1644	-	emrY_1			putative multidrug resistance protein EmrY
AMODNKIM_00759	CDS	803058	803627	570	-				hypothetical protein
AMODNKIM_00760	CDS	803806	804429	624	+	rhtC_1		COG1280	Threonine efflux protein
AMODNKIM_00761	CDS	804592	804780	189	+				hypothetical protein
AMODNKIM_00762	CDS	804910	806973	2064	-	metG	6.1.1.10	COG0073	Methionine--tRNA ligase
AMODNKIM_00763	CDS	807260	807760	501	+				hypothetical protein
AMODNKIM_00764	CDS	807906	809135	1230	+				Iron-sulfur cluster carrier protein
AMODNKIM_00765	CDS	809281	810153	873	+	mtnN_2	3.2.2.9		5'-methylthioadenosine/S-adenosylhomocysteine nucleosidase
AMODNKIM_00766	CDS	810184	810750	567	-				hypothetical protein
AMODNKIM_00767	CDS	811107	811700	594	+				hypothetical protein
AMODNKIM_00768	CDS	811815	812384	570	+	dcd	3.5.4.13		dCTP deaminase
AMODNKIM_00769	CDS	812681	814159	1479	+				hypothetical protein
AMODNKIM_00770	CDS	814392	816425	2034	+				hypothetical protein
AMODNKIM_00771	CDS	816439	817164	726	+				hypothetical protein
AMODNKIM_00772	CDS	817197	819608	2412	+				hypothetical protein
AMODNKIM_00773	CDS	819770	820723	954	+				hypothetical protein
AMODNKIM_00774	CDS	820803	821747	945	-	dusC	1.3.1.-	COG0042	tRNA-dihydrouridine(16) synthase
AMODNKIM_00775	CDS	821832	822641	810	-	ypjD		COG4137	Inner membrane protein YpjD
AMODNKIM_00776	CDS	822782	824191	1410	+	ffh		COG0541	Signal recognition particle protein
AMODNKIM_00777	CDS	824241	824975	735	-	coaX	2.7.1.33	COG1521	Type III pantothenate kinase
AMODNKIM_00778	CDS	824991	825743	753	-	birA_2	6.3.4.15	COG0340	Bifunctional ligase/repressor BirA
AMODNKIM_00779	CDS	825774	826577	804	+				hypothetical protein
AMODNKIM_00780	CDS	826826	827521	696	+				hypothetical protein
AMODNKIM_00781	CDS	827532	830981	3450	+	smc_1		COG1196	Chromosome partition protein Smc
AMODNKIM_00782	CDS	830983	832020	1038	+	zipA			Cell division protein ZipA
AMODNKIM_00783	CDS	832115	834151	2037	+	ligA	6.5.1.2	COG0272	DNA ligase
AMODNKIM_00784	CDS	834405	834869	465	+	bfr_1	1.16.3.1	COG2193	Bacterioferritin
AMODNKIM_00785	CDS	835110	836357	1248	+	ybjJ			Inner membrane protein YbjJ
AMODNKIM_00786	CDS	836425	837855	1431	-	otsA	2.4.1.15	COG0380	Trehalose-6-phosphate synthase
AMODNKIM_00787	CDS	837843	838694	852	-	otsB	3.1.3.12	COG1877	Trehalose-6-phosphate phosphatase
AMODNKIM_00788	CDS	839050	839784	735	+	bioH	3.1.1.85	COG0596	Pimeloyl-[acyl-carrier protein] methyl ester esterase
AMODNKIM_00789	CDS	839875	841155	1281	+	bioA	2.6.1.62	COG0161	Adenosylmethionine-8-amino-7-oxononanoate aminotransferase
AMODNKIM_00790	CDS	841157	842314	1158	+	bioF	2.3.1.47		8-amino-7-oxononanoate synthase
AMODNKIM_00791	CDS	842311	843060	750	+	tam	2.1.1.144		Trans-aconitate 2-methyltransferase
AMODNKIM_00792	CDS	843061	843705	645	+	bioD1	6.3.3.3	COG0132	ATP-dependent dethiobiotin synthetase BioD 1
AMODNKIM_00793	CDS	843769	844692	924	-	rluB	5.4.99.22	COG1187	Ribosomal large subunit pseudouridine synthase B
AMODNKIM_00794	CDS	844734	845330	597	-	scpB		COG1386	Segregation and condensation protein B
AMODNKIM_00795	CDS	845327	846094	768	-	scpA		COG1354	Segregation and condensation protein A
AMODNKIM_00796	CDS	846347	846964	618	-	yciO		COG0009	putative protein YciO
AMODNKIM_00797	CDS	847054	847716	663	-				hypothetical protein
AMODNKIM_00798	CDS	847813	848373	561	+	yceD		COG1399	Large ribosomal RNA subunit accumulation protein YceD
AMODNKIM_00799	CDS	848448	848633	186	+	rpmF		COG0333	50S ribosomal protein L32
AMODNKIM_00800	CDS	848786	849772	987	+	fabD_1	2.3.1.39	COG0331	Malonyl CoA-acyl carrier protein transacylase
AMODNKIM_00801	CDS	849769	850503	735	+	fabG_3	1.1.1.100		3-oxoacyl-[acyl-carrier-protein] reductase FabG
AMODNKIM_00802	CDS	850588	850824	237	+	acpP_2		COG0236	Acyl carrier protein
AMODNKIM_00803	CDS	851015	851488	474	+	kbp		COG1652	Potassium binding protein Kbp
AMODNKIM_00804	CDS	851534	852301	768	-	thiD	2.7.1.49		Hydroxymethylpyrimidine/phosphomethylpyrimidine kinase
AMODNKIM_00805	CDS	852399	853073	675	+		3.1.3.5	COG0546	5'-nucleotidase
AMODNKIM_00806	CDS	853138	853797	660	-	ribB	4.1.99.12	COG0108	3,4-dihydroxy-2-butanone 4-phosphate synthase
AMODNKIM_00807	CDS	854215	855996	1782	+				hypothetical protein
AMODNKIM_00808	CDS	855996	856556	561	+				hypothetical protein
AMODNKIM_00809	CDS	856612	856992	381	-	panD	4.1.1.11	COG0853	Aspartate 1-decarboxylase
AMODNKIM_00810	CDS	857124	857705	582	-	pth	3.1.1.29	COG0193	Peptidyl-tRNA hydrolase
AMODNKIM_00811	CDS	857726	858022	297	-	rplY			50S ribosomal protein L25
AMODNKIM_00812	CDS	858122	859072	951	-	prs_1	2.7.6.1	COG0462	Ribose-phosphate pyrophosphokinase
AMODNKIM_00813	tRNA	859109	859183	75	-				tRNA-Gln(ttg)
AMODNKIM_00814	tRNA	859275	859349	75	-				tRNA-Gln(ttg)
AMODNKIM_00815	tRNA	859371	859445	75	-				tRNA-Gln(ttg)
AMODNKIM_00816	tRNA	859473	859547	75	-				tRNA-Gln(ttg)
AMODNKIM_00817	CDS	860399	860977	579	-	lolB		COG3017	Outer-membrane lipoprotein LolB
AMODNKIM_00818	CDS	860982	862691	1710	-	bepA_1	3.4.-.-		Beta-barrel assembly-enhancing protease
AMODNKIM_00819	CDS	862780	864063	1284	+	hemA	1.2.1.70	COG0373	Glutamyl-tRNA reductase
AMODNKIM_00820	CDS	864060	865925	1866	-	dnaG	2.7.7.-		DNA primase
AMODNKIM_00821	CDS	866084	867241	1158	-	bamD			Outer membrane protein assembly factor BamD
AMODNKIM_00822	CDS	867313	868365	1053	+	rluD	5.4.99.23	COG0564	Ribosomal large subunit pseudouridine synthase D
AMODNKIM_00823	CDS	868376	869113	738	+	yfiH	1.10.3.-	COG1496	Polyphenol oxidase
AMODNKIM_00824	CDS	869334	869885	552	+	fldP_2			Flavodoxin FldP
AMODNKIM_00825	CDS	869927	870403	477	-	smpB		COG0691	SsrA-binding protein
AMODNKIM_00826	CDS	870539	871030	492	+	coaD	2.7.7.3		Phosphopantetheine adenylyltransferase
AMODNKIM_00827	CDS	871032	871295	264	+	fdx_1		COG1145	Ferredoxin
AMODNKIM_00828	tRNA	871742	871818	77	+				tRNA-Met(cat)
AMODNKIM_00829	CDS	871968	873152	1185	+				hypothetical protein
AMODNKIM_00830	CDS	873205	874185	981	-	dmlR_1			HTH-type transcriptional regulator DmlR
AMODNKIM_00831	CDS	874289	875401	1113	+	dmlA	1.1.1.83	COG0473	D-malate dehydrogenase [decarboxylating]
AMODNKIM_00832	CDS	875428	877074	1647	+	caiT			L-carnitine/gamma-butyrobetaine antiporter
AMODNKIM_00833	CDS	877086	878060	975	+	nlhH_1	3.1.1.1	COG0657	Carboxylesterase NlhH
AMODNKIM_00834	CDS	878103	879218	1116	+	cntA	1.14.13.239	COG4638	Carnitine monooxygenase oxygenase subunit
AMODNKIM_00835	CDS	879283	880734	1452	+	gabD_1	1.2.1.79	COG1012	Succinate-semialdehyde dehydrogenase [NADP(+)] GabD
AMODNKIM_00836	CDS	880782	881738	957	+	cntB	1.14.13.239	COG1018	Carnitine monooxygenase reductase subunit
AMODNKIM_00837	tRNA	881896	881972	77	+				tRNA-Met(cat)
AMODNKIM_00838	CDS	882016	883044	1029	-				hypothetical protein
AMODNKIM_00839	CDS	883037	884662	1626	-	nadE	6.3.5.1	COG0171	Glutamine-dependent NAD(+) synthetase
AMODNKIM_00840	CDS	885047	885607	561	-				hypothetical protein
AMODNKIM_00841	CDS	885698	886558	861	-				hypothetical protein
AMODNKIM_00842	CDS	886729	887181	453	-				hypothetical protein
AMODNKIM_00843	CDS	887200	888429	1230	-	fabB_2	2.3.1.41		3-oxoacyl-[acyl-carrier-protein] synthase 1
AMODNKIM_00844	CDS	888726	890051	1326	+				hypothetical protein
AMODNKIM_00845	CDS	890252	890626	375	+	rpsL		COG0048	30S ribosomal protein S12
AMODNKIM_00846	CDS	890786	891256	471	+	rpsG		COG0049	30S ribosomal protein S7
AMODNKIM_00847	CDS	891435	893573	2139	+	fusA		COG0480	Elongation factor G
AMODNKIM_00848	CDS	893668	894858	1191	+	tufA_2		COG0050	Elongation factor Tu
AMODNKIM_00849	CDS	895062	895943	882	+				hypothetical protein
AMODNKIM_00850	CDS	896180	897055	876	+				hypothetical protein
AMODNKIM_00851	CDS	897164	897619	456	+	rimI	2.3.1.266	COG0456	[Ribosomal protein S18]-alanine N-acetyltransferase
AMODNKIM_00852	CDS	897664	898479	816	-	bpt	2.3.2.29	COG2935	Aspartate/glutamate leucyltransferase
AMODNKIM_00853	CDS	898498	899229	732	-	aat	2.3.2.6	COG2360	Leucyl/phenylalanyl-tRNA--protein transferase
AMODNKIM_00854	CDS	899349	900296	948	-		4.3.1.9	COG0492	Glucosaminate ammonia-lyase
AMODNKIM_00855	CDS	900566	903598	3033	+				hypothetical protein
AMODNKIM_00856	CDS	903748	904368	621	+	rhtC_2		COG1280	Threonine efflux protein
AMODNKIM_00857	CDS	904424	904828	405	-				hypothetical protein
AMODNKIM_00858	CDS	904887	905258	372	-				hypothetical protein
AMODNKIM_00859	CDS	905406	905693	288	-				hypothetical protein
AMODNKIM_00860	CDS	905777	906049	273	-	minE		COG0851	Cell division topological specificity factor
AMODNKIM_00861	CDS	906052	906888	837	-	minD		COG2894	Septum site-determining protein MinD
AMODNKIM_00862	CDS	906935	907657	723	-	minC		COG0850	Septum site-determining protein MinC
AMODNKIM_00863	CDS	907779	908825	1047	-				hypothetical protein
AMODNKIM_00864	CDS	908842	909768	927	-	yihG	2.3.-.-	COG0204	putative acyltransferase YihG
AMODNKIM_00865	CDS	910013	910666	654	+	yiaD		COG2885	putative lipoprotein YiaD
AMODNKIM_00866	CDS	910683	910775	93	-				hypothetical protein
AMODNKIM_00867	CDS	910860	912899	2040	+	rep_2	3.6.4.12	COG0210	ATP-dependent DNA helicase Rep
AMODNKIM_00868	CDS	912924	913376	453	+	dut	3.6.1.23	COG0756	Deoxyuridine 5'-triphosphate nucleotidohydrolase
AMODNKIM_00869	CDS	913576	914994	1419	+	algC_2	5.4.2.2	COG1109	Phosphomannomutase/phosphoglucomutase
AMODNKIM_00870	CDS	915009	915917	909	+	argB	2.7.2.8	COG0548	Acetylglutamate kinase
AMODNKIM_00871	CDS	916038	916820	783	+				hypothetical protein
AMODNKIM_00872	CDS	916947	917777	831	+	yafJ	2.4.2.-	COG0121	Putative glutamine amidotransferase YafJ
AMODNKIM_00873	CDS	918030	918485	456	+				Bacteriohemerythrin
AMODNKIM_00874	CDS	918638	919705	1068	+				hypothetical protein
AMODNKIM_00875	CDS	919705	920028	324	+	rnfH			Protein RnfH
AMODNKIM_00876	CDS	920083	920481	399	-	bamE			Outer membrane protein assembly factor BamE
AMODNKIM_00877	CDS	920593	921030	438	+	fur		COG0735	Ferric uptake regulation protein
AMODNKIM_00878	CDS	921100	922218	1119	-	pilT_1		COG2805	Twitching mobility protein
AMODNKIM_00879	CDS	922246	923313	1068	-	pilT_2		COG2805	Twitching mobility protein
AMODNKIM_00880	CDS	923410	924102	693	+	yggS		COG0325	Pyridoxal phosphate homeostasis protein
AMODNKIM_00881	CDS	924304	927900	3597	-	smc_2			Chromosome partition protein Smc
AMODNKIM_00882	CDS	927910	929178	1269	-	cpdA_2	3.1.4.53		3',5'-cyclic adenosine monophosphate phosphodiesterase CpdA
AMODNKIM_00883	CDS	929324	929815	492	+				hypothetical protein
AMODNKIM_00884	CDS	929883	930260	378	-				hypothetical protein
AMODNKIM_00885	CDS	930640	931092	453	+				hypothetical protein
AMODNKIM_00886	CDS	931182	932087	906	+				Epimerase family protein
AMODNKIM_00887	CDS	932079	933194	1116	-	thiO	1.4.3.19		Glycine oxidase
AMODNKIM_00888	CDS	933220	934317	1098	-	hemB	4.2.1.24	COG0113	Delta-aminolevulinic acid dehydratase
AMODNKIM_00889	CDS	934376	934873	498	+				hypothetical protein
AMODNKIM_00890	CDS	935143	936294	1152	+	emrK		COG1566	putative multidrug resistance protein EmrK
AMODNKIM_00891	CDS	936301	937824	1524	+	emrB_1			Multidrug export protein EmrB
AMODNKIM_00892	CDS	938127	940112	1986	+	ggt	3.4.19.13	COG0405	Glutathione hydrolase proenzyme
AMODNKIM_00893	tmRNA	940275	940634	360	+	ssrA			transfer-messenger RNA, SsrA
AMODNKIM_00894	CDS	940810	941967	1158	+	intS_1		COG0582	Prophage integrase IntS
AMODNKIM_00895	CDS	941964	942848	885	+				hypothetical protein
AMODNKIM_00896	CDS	942839	943294	456	+				hypothetical protein
AMODNKIM_00897	CDS	943409	944401	993	+				hypothetical protein
AMODNKIM_00898	CDS	944408	944578	171	-				hypothetical protein
AMODNKIM_00899	CDS	944579	944794	216	-				hypothetical protein
AMODNKIM_00900	CDS	944791	945000	210	-				hypothetical protein
AMODNKIM_00901	CDS	944997	945506	510	-				hypothetical protein
AMODNKIM_00902	CDS	945503	946039	537	-				hypothetical protein
AMODNKIM_00903	CDS	946032	946211	180	-				hypothetical protein
AMODNKIM_00904	CDS	946212	946502	291	-				hypothetical protein
AMODNKIM_00905	CDS	946643	947671	1029	-				hypothetical protein
AMODNKIM_00906	CDS	947684	948364	681	-	exoX_1	3.1.11.-	COG0847	Exodeoxyribonuclease 10
AMODNKIM_00907	CDS	948535	948906	372	-				hypothetical protein
AMODNKIM_00908	CDS	948903	949232	330	-				hypothetical protein
AMODNKIM_00909	CDS	949291	949551	261	-				hypothetical protein
AMODNKIM_00910	CDS	949637	950440	804	-				hypothetical protein
AMODNKIM_00911	CDS	950481	950813	333	-				hypothetical protein
AMODNKIM_00912	CDS	951007	951291	285	-				hypothetical protein
AMODNKIM_00913	CDS	951295	952068	774	-	prtR_1		COG2932	HTH-type transcriptional regulator PrtR
AMODNKIM_00914	CDS	952195	952398	204	+				hypothetical protein
AMODNKIM_00915	CDS	952434	952808	375	+				hypothetical protein
AMODNKIM_00916	CDS	952842	953042	201	+				hypothetical protein
AMODNKIM_00917	CDS	953039	953224	186	+				hypothetical protein
AMODNKIM_00918	CDS	953221	953676	456	+				hypothetical protein
AMODNKIM_00919	CDS	953673	954290	618	+				hypothetical protein
AMODNKIM_00920	CDS	954287	954826	540	+				hypothetical protein
AMODNKIM_00921	CDS	954823	955431	609	+				hypothetical protein
AMODNKIM_00922	CDS	955437	955820	384	+				hypothetical protein
AMODNKIM_00923	CDS	955817	957295	1479	+				hypothetical protein
AMODNKIM_00924	CDS	957299	958342	1044	+				hypothetical protein
AMODNKIM_00925	CDS	958339	959103	765	+	dnaA_2			Chromosomal replication initiator protein DnaA
AMODNKIM_00926	CDS	959100	959633	534	+				hypothetical protein
AMODNKIM_00927	CDS	960089	960544	456	+				hypothetical protein
AMODNKIM_00928	CDS	961507	962196	690	+				hypothetical protein
AMODNKIM_00929	CDS	962197	962883	687	+				hypothetical protein
AMODNKIM_00930	CDS	962897	963733	837	+				hypothetical protein
AMODNKIM_00931	CDS	963849	964112	264	+				hypothetical protein
AMODNKIM_00932	CDS	964195	966483	2289	+				hypothetical protein
AMODNKIM_00933	CDS	966497	967552	1056	+				hypothetical protein
AMODNKIM_00934	CDS	967876	968817	942	+				hypothetical protein
AMODNKIM_00935	CDS	968882	969781	900	+				hypothetical protein
AMODNKIM_00936	CDS	969853	970269	417	-				hypothetical protein
AMODNKIM_00937	CDS	970467	971408	942	+				hypothetical protein
AMODNKIM_00938	CDS	971374	971964	591	+				hypothetical protein
AMODNKIM_00939	CDS	971964	972302	339	+				hypothetical protein
AMODNKIM_00940	CDS	972283	973728	1446	+				hypothetical protein
AMODNKIM_00941	CDS	973716	974330	615	+				hypothetical protein
AMODNKIM_00942	CDS	974409	974867	459	+				hypothetical protein
AMODNKIM_00943	CDS	974879	975106	228	+				hypothetical protein
AMODNKIM_00944	CDS	975179	976084	906	+				hypothetical protein
AMODNKIM_00945	CDS	976087	976890	804	+				hypothetical protein
AMODNKIM_00946	CDS	976883	977083	201	+				hypothetical protein
AMODNKIM_00947	CDS	977095	977607	513	+				hypothetical protein
AMODNKIM_00948	CDS	977627	979618	1992	+				hypothetical protein
AMODNKIM_00949	CDS	979691	981229	1539	+				hypothetical protein
AMODNKIM_00950	CDS	981244	981522	279	+				hypothetical protein
AMODNKIM_00951	CDS	981524	982654	1131	+				hypothetical protein
AMODNKIM_00952	CDS	982644	983192	549	+				hypothetical protein
AMODNKIM_00953	CDS	983189	983491	303	+				hypothetical protein
AMODNKIM_00954	CDS	983646	985424	1779	+				hypothetical protein
AMODNKIM_00955	CDS	985488	986114	627	+				hypothetical protein
AMODNKIM_00956	CDS	986119	986406	288	+				hypothetical protein
AMODNKIM_00957	CDS	986525	987820	1296	+				hypothetical protein
AMODNKIM_00958	CDS	987839	988606	768	+				hypothetical protein
AMODNKIM_00959	CDS	988668	988946	279	+				hypothetical protein
AMODNKIM_00960	CDS	989032	989928	897	-				hypothetical protein
AMODNKIM_00961	CDS	990135	990386	252	+				hypothetical protein
AMODNKIM_00962	CDS	990920	991207	288	+				hypothetical protein
AMODNKIM_00963	CDS	991170	991436	267	+	relE	3.1.-.-	COG2026	mRNA interferase toxin RelE
AMODNKIM_00964	CDS	991563	992207	645	+				hypothetical protein
AMODNKIM_00965	CDS	992207	992656	450	+				hypothetical protein
AMODNKIM_00966	CDS	992656	993549	894	+				hypothetical protein
AMODNKIM_00967	CDS	993559	998745	5187	+				hypothetical protein
AMODNKIM_00968	CDS	998740	999276	537	-			COG3385	IS4 family transposase ISAba33
AMODNKIM_00969	CDS	999273	999833	561	-			COG3385	IS4 family transposase ISAba33
AMODNKIM_00970	CDS	999872	1003747	3876	+				hypothetical protein
AMODNKIM_00971	CDS	1003824	1004252	429	+				hypothetical protein
AMODNKIM_00972	CDS	1004249	1004584	336	+				hypothetical protein
AMODNKIM_00973	CDS	1004659	1006284	1626	+				IS66 family transposase ISAba17
AMODNKIM_00974	CDS	1006331	1007683	1353	+				hypothetical protein
AMODNKIM_00975	CDS	1007684	1008082	399	+				hypothetical protein
AMODNKIM_00976	CDS	1008082	1008852	771	+				hypothetical protein
AMODNKIM_00977	CDS	1008880	1009074	195	-				hypothetical protein
AMODNKIM_00978	CDS	1009233	1010768	1536	+				hypothetical protein
AMODNKIM_00979	CDS	1010768	1011421	654	+				hypothetical protein
AMODNKIM_00980	CDS	1011495	1013447	1953	+				hypothetical protein
AMODNKIM_00981	CDS	1013447	1014898	1452	+				hypothetical protein
AMODNKIM_00982	CDS	1015049	1015678	630	+				hypothetical protein
AMODNKIM_00983	CDS	1015675	1016754	1080	+				hypothetical protein
AMODNKIM_00984	CDS	1016985	1017683	699	+				hypothetical protein
AMODNKIM_00985	CDS	1017842	1018741	900	-				hypothetical protein
AMODNKIM_00986	CDS	1018943	1019191	249	+				hypothetical protein
AMODNKIM_00987	CDS	1019279	1020073	795	+				hypothetical protein
AMODNKIM_00988	CDS	1020073	1020771	699	+				hypothetical protein
AMODNKIM_00989	CDS	1020803	1020982	180	+				hypothetical protein
AMODNKIM_00990	CDS	1021106	1021393	288	+				hypothetical protein
AMODNKIM_00991	CDS	1021390	1022160	771	+				hypothetical protein
AMODNKIM_00992	CDS	1022286	1022927	642	-				hypothetical protein
AMODNKIM_00993	CDS	1022924	1023766	843	-				hypothetical protein
AMODNKIM_00994	CDS	1023911	1024363	453	-				hypothetical protein
AMODNKIM_00995	CDS	1024385	1024927	543	-				hypothetical protein
AMODNKIM_00996	CDS	1024964	1025431	468	-	umuC_1		COG0389	Protein UmuC
AMODNKIM_00997	CDS	1025434	1025568	135	-				hypothetical protein
AMODNKIM_00998	CDS	1025717	1026382	666	+				hypothetical protein
AMODNKIM_00999	CDS	1026704	1027987	1284	+	intS_2		COG0582	Prophage integrase IntS
AMODNKIM_01000	CDS	1028135	1028902	768	+				hypothetical protein
AMODNKIM_01001	CDS	1029100	1029327	228	+				hypothetical protein
AMODNKIM_01002	CDS	1029330	1029539	210	+				hypothetical protein
AMODNKIM_01003	CDS	1029536	1030090	555	+				hypothetical protein
AMODNKIM_01004	CDS	1030083	1030451	369	+				hypothetical protein
AMODNKIM_01005	CDS	1030461	1030766	306	+				hypothetical protein
AMODNKIM_01006	CDS	1030769	1030885	117	+				hypothetical protein
AMODNKIM_01007	CDS	1030888	1031166	279	+				hypothetical protein
AMODNKIM_01008	CDS	1031179	1033644	2466	+				hypothetical protein
AMODNKIM_01009	CDS	1033978	1034094	117	+				Single-stranded DNA-binding protein
AMODNKIM_01010	CDS	1034317	1035759	1443	+				hypothetical protein
AMODNKIM_01011	CDS	1036272	1037318	1047	+	yejK		COG3081	Nucleoid-associated protein YejK
AMODNKIM_01012	CDS	1037321	1038526	1206	+				hypothetical protein
AMODNKIM_01013	CDS	1040924	1042306	1383	+				hypothetical protein
AMODNKIM_01014	CDS	1042417	1044210	1794	+				hypothetical protein
AMODNKIM_01015	CDS	1044238	1045002	765	+				hypothetical protein
AMODNKIM_01016	CDS	1044995	1046323	1329	+	queC_1	6.3.4.20		7-cyano-7-deazaguanine synthase
AMODNKIM_01017	CDS	1046323	1047063	741	+	tatD	3.1.11.-	COG0084	3'-5' ssDNA/RNA exonuclease TatD
AMODNKIM_01018	CDS	1047083	1047361	279	-				hypothetical protein
AMODNKIM_01019	CDS	1047595	1047879	285	-				hypothetical protein
AMODNKIM_01020	CDS	1048517	1049002	486	-				hypothetical protein
AMODNKIM_01021	CDS	1049135	1049863	729	-				hypothetical protein
AMODNKIM_01022	CDS	1049942	1051327	1386	-	naiP_2			Putative niacin/nicotinamide transporter NaiP
AMODNKIM_01023	CDS	1051500	1052444	945	-	dapA_2	4.3.3.7	COG0329	4-hydroxy-tetrahydrodipicolinate synthase
AMODNKIM_01024	CDS	1052632	1053522	891	+	cynR_1			HTH-type transcriptional regulator CynR
AMODNKIM_01025	CDS	1053611	1054180	570	+	fecI		COG1595	putative RNA polymerase sigma factor FecI
AMODNKIM_01026	CDS	1054181	1055197	1017	+				hypothetical protein
AMODNKIM_01027	CDS	1055337	1058510	3174	+				hypothetical protein
AMODNKIM_01028	CDS	1058703	1059494	792	+				hypothetical protein
AMODNKIM_01029	CDS	1059580	1061070	1491	+				TPR repeat-containing protein
AMODNKIM_01030	CDS	1061081	1062001	921	+				hypothetical protein
AMODNKIM_01031	CDS	1062037	1062633	597	+	pigA	1.14.99.58	COG3230	Heme oxygenase PigA
AMODNKIM_01032	CDS	1062662	1063102	441	+				hypothetical protein
AMODNKIM_01033	CDS	1063105	1063380	276	-				hypothetical protein
AMODNKIM_01034	CDS	1063701	1064408	708	+				hypothetical protein
AMODNKIM_01035	CDS	1064532	1066445	1914	+				hypothetical protein
AMODNKIM_01036	CDS	1066500	1067834	1335	-	ydgI		COG0531	Putative arginine/ornithine antiporter
AMODNKIM_01037	CDS	1067840	1068718	879	-	mmuM	2.1.1.10	COG2040	Homocysteine S-methyltransferase
AMODNKIM_01038	CDS	1068935	1069405	471	-				hypothetical protein
AMODNKIM_01039	CDS	1069497	1071137	1641	-	mqo	1.1.5.4	COG0579	Malate:quinone oxidoreductase
AMODNKIM_01040	CDS	1071650	1073308	1659	-	betA	1.1.99.1	COG2303	Oxygen-dependent choline dehydrogenase
AMODNKIM_01041	CDS	1073404	1074876	1473	-	betB_1	1.2.1.8	COG1012	NAD/NADP-dependent betaine aldehyde dehydrogenase
AMODNKIM_01042	CDS	1074869	1075492	624	-	betI_4		COG1309	HTH-type transcriptional regulator BetI
AMODNKIM_01043	CDS	1075758	1077380	1623	+	betT1		COG1292	Osmo-independent choline transporter BetT1
AMODNKIM_01044	CDS	1077498	1079564	2067	+	betT2		COG1292	Osmo-dependent choline transporter BetT2
AMODNKIM_01045	CDS	1079576	1080190	615	+				hypothetical protein
AMODNKIM_01046	CDS	1080452	1080967	516	+				hypothetical protein
AMODNKIM_01047	CDS	1081078	1081278	201	-				hypothetical protein
AMODNKIM_01048	CDS	1081777	1082775	999	+	yeiR	3.6.-.-	COG0523	Zinc-binding GTPase YeiR
AMODNKIM_01049	CDS	1082813	1084075	1263	-	dctA_1		COG1301	Aerobic C4-dicarboxylate transport protein
AMODNKIM_01050	CDS	1084264	1084794	531	+	yaeQ		COG4681	putative protein YaeQ
AMODNKIM_01051	CDS	1084881	1085222	342	+	fbp_1	5.2.1.8	COG0545	FK506-binding protein
AMODNKIM_01052	CDS	1085459	1087453	1995	+	pgaB	3.5.1.-	COG0726	Poly-beta-1,6-N-acetyl-D-glucosamine N-deacetylase
AMODNKIM_01053	CDS	1087467	1088726	1260	+	pgaC_1	2.4.1.-	COG1215	Poly-beta-1,6-N-acetyl-D-glucosamine synthase
AMODNKIM_01054	CDS	1088809	1089228	420	+				hypothetical protein
AMODNKIM_01055	CDS	1089331	1090119	789	-	paaF_1	4.2.1.17	COG1024	2,3-dehydroadipyl-CoA hydratase
AMODNKIM_01056	CDS	1090367	1090948	582	+	pnuC		COG3201	Nicotinamide riboside transporter PnuC
AMODNKIM_01057	CDS	1090963	1091262	300	+				hypothetical protein
AMODNKIM_01058	CDS	1091308	1092120	813	-	kdgR		COG1414	Transcriptional regulator KdgR
AMODNKIM_01059	CDS	1092394	1092699	306	+	doxA			Naphthalene 1,2-dioxygenase system, ferredoxin component
AMODNKIM_01060	CDS	1092727	1093026	300	+				hypothetical protein
AMODNKIM_01061	CDS	1093043	1094110	1068	+		1.14.13.239		Carnitine monooxygenase oxygenase subunit
AMODNKIM_01062	CDS	1094103	1094867	765	+	cpnA	1.1.1.163		Cyclopentanol dehydrogenase
AMODNKIM_01063	CDS	1094879	1095808	930	+				hypothetical protein
AMODNKIM_01064	CDS	1095838	1097049	1212	+	cmtAa	1.18.1.3	COG0446	p-cumate 2,3-dioxygenase system, ferredoxin--NAD(+) reductase component
AMODNKIM_01065	CDS	1097092	1098315	1224	+	gudP			putative glucarate transporter
AMODNKIM_01066	CDS	1098339	1098860	522	+				hypothetical protein
AMODNKIM_01067	CDS	1098896	1099720	825	+	catD_1	3.1.1.24	COG0596	3-oxoadipate enol-lactonase 2
AMODNKIM_01068	CDS	1099736	1100530	795	+	baiA	1.1.1.392		3-alpha-hydroxycholanate dehydrogenase (NADP(+))
AMODNKIM_01069	CDS	1100546	1101337	792	+	nadX	1.4.1.21	COG1712	L-aspartate dehydrogenase
AMODNKIM_01070	CDS	1101351	1102817	1467	+	betB_2	1.2.1.8	COG1012	NAD/NADP-dependent betaine aldehyde dehydrogenase
AMODNKIM_01071	CDS	1102856	1104496	1641	+	ilvB	2.2.1.6	COG0028	Acetolactate synthase isozyme 1 large subunit
AMODNKIM_01072	CDS	1104652	1105848	1197	+				hypothetical protein
AMODNKIM_01073	CDS	1105911	1107209	1299	-	proP_2			Proline/betaine transporter
AMODNKIM_01074	CDS	1107303	1107407	105	+				hypothetical protein
AMODNKIM_01075	CDS	1107444	1107926	483	+	def_2	3.5.1.88	COG0242	Peptide deformylase
AMODNKIM_01076	CDS	1108105	1109427	1323	+	glsA	3.5.1.2		Glutaminase
AMODNKIM_01077	CDS	1109394	1110182	789	-	nimR_2			HTH-type transcriptional regulator NimR
AMODNKIM_01078	CDS	1110289	1111509	1221	+	fsr			Fosmidomycin resistance protein
AMODNKIM_01079	CDS	1111577	1112722	1146	-	mro	5.1.3.3	COG2017	Aldose 1-epimerase
AMODNKIM_01080	CDS	1112914	1113360	447	+				hypothetical protein
AMODNKIM_01081	CDS	1113372	1114277	906	-	perR			HTH-type transcriptional regulator PerR
AMODNKIM_01082	CDS	1114432	1115181	750	+	fabG_4	1.1.1.100		3-oxoacyl-[acyl-carrier-protein] reductase FabG
AMODNKIM_01083	CDS	1115230	1116558	1329	+	nicT			Putative metabolite transport protein NicT
AMODNKIM_01084	CDS	1116578	1117423	846	+	aptA	2.2.1.-	COG3959	Apulose-4-phosphate transketolase subunit A
AMODNKIM_01085	CDS	1117434	1118438	1005	+	aptB	2.2.1.-	COG3958	Apulose-4-phosphate transketolase subunit B
AMODNKIM_01086	CDS	1118519	1122205	3687	-	metH	2.1.1.13	COG0646	Methionine synthase
AMODNKIM_01087	CDS	1122667	1124298	1632	+	pitA		COG0306	Low-affinity inorganic phosphate transporter 1
AMODNKIM_01088	CDS	1124465	1125799	1335	+	dsdA	4.3.1.18	COG3048	D-serine dehydratase
AMODNKIM_01089	CDS	1125843	1127390	1548	-				hypothetical protein
AMODNKIM_01090	CDS	1127927	1128091	165	-				hypothetical protein
AMODNKIM_01091	CDS	1128201	1129208	1008	-	egtB	1.14.99.50		Hercynine oxygenase
AMODNKIM_01092	CDS	1129205	1130881	1677	-	atsA	3.1.6.1	COG3119	Arylsulfatase
AMODNKIM_01093	CDS	1131052	1131669	618	-	glpG	3.4.21.105		Rhomboid protease GlpG
AMODNKIM_01094	CDS	1131827	1132465	639	+	nfuA		COG0316	Fe/S biogenesis protein NfuA
AMODNKIM_01095	CDS	1132635	1134899	2265	+	pfeA		COG4771	Ferric enterobactin receptor
AMODNKIM_01096	CDS	1134922	1135929	1008	-				hypothetical protein
AMODNKIM_01097	CDS	1135956	1136981	1026	-	lip1	3.1.1.3		Lipase 1
AMODNKIM_01098	CDS	1137266	1137880	615	+	mtcA2	4.2.1.1	COG0288	Carbonic anhydrase 2
AMODNKIM_01099	CDS	1137913	1138473	561	-	tesA	3.1.1.1	COG2755	Esterase TesA
AMODNKIM_01100	CDS	1138581	1139273	693	+	lolD_1	3.6.3.-	COG1136	Lipoprotein-releasing system ATP-binding protein LolD
AMODNKIM_01101	CDS	1139277	1141736	2460	+				hypothetical protein
AMODNKIM_01102	CDS	1141738	1142547	810	-	aarA	3.4.21.105	COG0705	Rhomboid protease AarA
AMODNKIM_01103	CDS	1142624	1143301	678	+	mtgA	2.4.1.129		Biosynthetic peptidoglycan transglycosylase
AMODNKIM_01104	CDS	1143406	1145484	2079	+	ppk_1	2.7.4.1		Polyphosphate kinase
AMODNKIM_01105	CDS	1145724	1146314	591	+				hypothetical protein
AMODNKIM_01106	CDS	1146344	1147252	909	-	oxyR			Hydrogen peroxide-inducible genes activator
AMODNKIM_01107	CDS	1147259	1148203	945	-	rdmC	3.1.1.95		Aclacinomycin methylesterase RdmC
AMODNKIM_01108	CDS	1148258	1149439	1182	-	rubB_1	1.18.1.1	COG1251	Rubredoxin-NAD(+) reductase
AMODNKIM_01109	CDS	1149532	1149696	165	-	rubA		COG1773	Rubredoxin
AMODNKIM_01110	CDS	1150140	1150577	438	+				hypothetical protein
AMODNKIM_01111	CDS	1150647	1151135	489	-				hypothetical protein
AMODNKIM_01112	CDS	1151392	1152921	1530	+	lysS	6.1.1.6	COG1190	Lysine--tRNA ligase
AMODNKIM_01113	CDS	1153111	1154553	1443	+				hypothetical protein
AMODNKIM_01114	CDS	1154635	1155069	435	-			COG3385	IS4 family transposase ISAba1
AMODNKIM_01115	CDS	1155156	1155725	570	-			COG3385	IS4 family transposase ISAba33
AMODNKIM_01116	CDS	1156034	1156132	99	+				hypothetical protein
AMODNKIM_01117	CDS	1156125	1157033	909	+	cysD	2.7.7.4	COG0175	Sulfate adenylyltransferase subunit 2
AMODNKIM_01118	CDS	1157064	1158677	1614	+	cysN	2.7.7.4		Sulfate adenylyltransferase subunit 1
AMODNKIM_01119	CDS	1158730	1159278	549	-				hypothetical protein
AMODNKIM_01120	CDS	1159500	1160012	513	+				hypothetical protein
AMODNKIM_01121	CDS	1160086	1161423	1338	-	citN		COG2851	Citrate transporter
AMODNKIM_01122	CDS	1161979	1163304	1326	-				hypothetical protein
AMODNKIM_01123	CDS	1163428	1164417	990	-	syrM1			HTH-type transcriptional regulator SyrM 1
AMODNKIM_01124	CDS	1165006	1166610	1605	+		4.1.3.1	COG2224	Isocitrate lyase
AMODNKIM_01125	CDS	1166673	1167152	480	-				hypothetical protein
AMODNKIM_01126	CDS	1167356	1167679	324	-				hypothetical protein
AMODNKIM_01127	CDS	1167874	1168749	876	+	ureD		COG0829	Urease accessory protein UreD
AMODNKIM_01128	CDS	1168851	1169153	303	+	ureA	3.5.1.5		Urease subunit gamma
AMODNKIM_01129	CDS	1169165	1169473	309	+	ureB	3.5.1.5		Urease subunit beta
AMODNKIM_01130	CDS	1169510	1171210	1701	+	ureC	3.5.1.5		Urease subunit alpha
AMODNKIM_01131	CDS	1171281	1171763	483	+	ureE			Urease accessory protein UreE
AMODNKIM_01132	CDS	1171750	1172415	666	+	ureF		COG0830	Urease accessory protein UreF
AMODNKIM_01133	CDS	1172439	1173053	615	+	ureG			Urease accessory protein UreG
AMODNKIM_01134	CDS	1173063	1173632	570	+				hypothetical protein
AMODNKIM_01135	CDS	1173675	1174226	552	-	rsmD	2.1.1.171	COG0742	Ribosomal RNA small subunit methyltransferase D
AMODNKIM_01136	CDS	1174226	1176244	2019	-	mrdA	3.4.16.4	COG0768	Peptidoglycan D,D-transpeptidase MrdA
AMODNKIM_01137	CDS	1176481	1176999	519	+				hypothetical protein
AMODNKIM_01138	CDS	1177061	1178374	1314	+				hypothetical protein
AMODNKIM_01139	CDS	1178461	1179114	654	+	adk	2.7.4.3	COG0563	Adenylate kinase
AMODNKIM_01140	CDS	1179353	1180045	693	-	nth	4.2.99.18	COG0177	Endonuclease III
AMODNKIM_01141	CDS	1180046	1180837	792	-	rsxB	7.-.-.-		Ion-translocating oxidoreductase complex subunit B
AMODNKIM_01142	CDS	1181109	1182512	1404	+	gdhA_1	1.4.1.4	COG0334	NADP-specific glutamate dehydrogenase
AMODNKIM_01143	CDS	1182567	1183676	1110	-				hypothetical protein
AMODNKIM_01144	CDS	1183846	1184622	777	-	ygiD	1.13.11.29	COG3384	4,5-DOPA dioxygenase extradiol
AMODNKIM_01145	CDS	1184735	1185214	480	-	rlmH	2.1.1.177	COG1576	Ribosomal RNA large subunit methyltransferase H
AMODNKIM_01146	CDS	1185516	1187945	2430	-	lon_1	3.4.21.53	COG0466	Lon protease
AMODNKIM_01147	CDS	1188723	1195910	7188	+				hypothetical protein
AMODNKIM_01148	CDS	1195968	1196747	780	+	ompA_1			Outer membrane protein A
AMODNKIM_01149	CDS	1196859	1197443	585	-		6.3.3.2	COG0212	5-formyltetrahydrofolate cyclo-ligase
AMODNKIM_01150	CDS	1197685	1198026	342	+				hypothetical protein
AMODNKIM_01151	CDS	1198134	1198247	114	+				hypothetical protein
AMODNKIM_01152	CDS	1198320	1198637	318	+				hypothetical protein
AMODNKIM_01153	CDS	1199058	1199321	264	-				hypothetical protein
AMODNKIM_01154	CDS	1199322	1200044	723	-				hypothetical protein
AMODNKIM_01155	CDS	1200041	1200448	408	-				hypothetical protein
AMODNKIM_01156	CDS	1200449	1200700	252	-				hypothetical protein
AMODNKIM_01157	CDS	1200702	1201634	933	-				hypothetical protein
AMODNKIM_01158	CDS	1201631	1202752	1122	-				hypothetical protein
AMODNKIM_01159	CDS	1202764	1203087	324	-				hypothetical protein
AMODNKIM_01160	CDS	1203080	1203370	291	-				hypothetical protein
AMODNKIM_01161	CDS	1203370	1203813	444	-				hypothetical protein
AMODNKIM_01162	CDS	1204007	1204249	243	+				hypothetical protein
AMODNKIM_01163	CDS	1204256	1204459	204	-				hypothetical protein
AMODNKIM_01164	CDS	1204598	1205101	504	-				hypothetical protein
AMODNKIM_01165	CDS	1205103	1206110	1008	-				hypothetical protein
AMODNKIM_01166	CDS	1206162	1206377	216	-				hypothetical protein
AMODNKIM_01167	CDS	1206392	1207144	753	-				hypothetical protein
AMODNKIM_01168	CDS	1207448	1207768	321	+				hypothetical protein
AMODNKIM_01169	CDS	1207830	1208102	273	+				hypothetical protein
AMODNKIM_01170	CDS	1208174	1208398	225	+				hypothetical protein
AMODNKIM_01171	CDS	1208391	1209272	882	+				hypothetical protein
AMODNKIM_01172	CDS	1209275	1210075	801	+				hypothetical protein
AMODNKIM_01173	CDS	1210072	1210410	339	+				hypothetical protein
AMODNKIM_01174	CDS	1210403	1210795	393	+				hypothetical protein
AMODNKIM_01175	CDS	1210795	1211196	402	+				hypothetical protein
AMODNKIM_01176	CDS	1211193	1211669	477	+				hypothetical protein
AMODNKIM_01177	CDS	1211641	1211895	255	+				hypothetical protein
AMODNKIM_01178	CDS	1212141	1212359	219	+				hypothetical protein
AMODNKIM_01179	CDS	1212573	1213124	552	+				hypothetical protein
AMODNKIM_01180	CDS	1213298	1213531	234	-				hypothetical protein
AMODNKIM_01181	CDS	1213943	1214038	96	+				hypothetical protein
AMODNKIM_01182	CDS	1214174	1214518	345	+				hypothetical protein
AMODNKIM_01183	CDS	1214727	1214963	237	+				hypothetical protein
AMODNKIM_01184	CDS	1215628	1216083	456	+				hypothetical protein
AMODNKIM_01185	CDS	1216144	1216578	435	+				hypothetical protein
AMODNKIM_01186	CDS	1216547	1217188	642	+				hypothetical protein
AMODNKIM_01187	CDS	1217247	1217762	516	+				hypothetical protein
AMODNKIM_01188	CDS	1217722	1219014	1293	+				hypothetical protein
AMODNKIM_01189	CDS	1219054	1220394	1341	+				hypothetical protein
AMODNKIM_01190	CDS	1220404	1221510	1107	+				hypothetical protein
AMODNKIM_01191	CDS	1221507	1221737	231	+				hypothetical protein
AMODNKIM_01192	CDS	1221753	1221905	153	+				hypothetical protein
AMODNKIM_01193	CDS	1221957	1222271	315	+				hypothetical protein
AMODNKIM_01194	CDS	1222358	1223149	792	+				hypothetical protein
AMODNKIM_01195	CDS	1223163	1224113	951	+				hypothetical protein
AMODNKIM_01196	CDS	1224158	1224493	336	+				hypothetical protein
AMODNKIM_01197	CDS	1224497	1224877	381	+				hypothetical protein
AMODNKIM_01198	CDS	1224878	1225246	369	+				hypothetical protein
AMODNKIM_01199	CDS	1225315	1225512	198	+				hypothetical protein
AMODNKIM_01200	CDS	1225520	1225813	294	+				hypothetical protein
AMODNKIM_01201	CDS	1225865	1226275	411	+				hypothetical protein
AMODNKIM_01202	CDS	1226247	1226615	369	+				hypothetical protein
AMODNKIM_01203	CDS	1226572	1227015	444	+				hypothetical protein
AMODNKIM_01204	CDS	1227017	1227235	219	+				hypothetical protein
AMODNKIM_01205	CDS	1227344	1227865	522	+				hypothetical protein
AMODNKIM_01206	CDS	1227962	1228315	354	+				hypothetical protein
AMODNKIM_01207	CDS	1228315	1229493	1179	+				hypothetical protein
AMODNKIM_01208	CDS	1229546	1230463	918	+				hypothetical protein
AMODNKIM_01209	CDS	1230533	1231048	516	+				hypothetical protein
AMODNKIM_01210	CDS	1231551	1231850	300	+				hypothetical protein
AMODNKIM_01211	CDS	1231859	1232317	459	+				hypothetical protein
AMODNKIM_01212	CDS	1232422	1233102	681	+				hypothetical protein
AMODNKIM_01213	CDS	1233104	1233367	264	+				hypothetical protein
AMODNKIM_01214	CDS	1233495	1237805	4311	+				hypothetical protein
AMODNKIM_01215	CDS	1237896	1238483	588	+				hypothetical protein
AMODNKIM_01216	CDS	1238576	1238974	399	+				hypothetical protein
AMODNKIM_01217	CDS	1238974	1239480	507	+				hypothetical protein
AMODNKIM_01218	CDS	1239477	1239839	363	+				hypothetical protein
AMODNKIM_01219	CDS	1239832	1243257	3426	+				hypothetical protein
AMODNKIM_01220	CDS	1243325	1243714	390	+				hypothetical protein
AMODNKIM_01221	CDS	1243756	1244301	546	+				hypothetical protein
AMODNKIM_01222	CDS	1244783	1245232	450	+				hypothetical protein
AMODNKIM_01223	CDS	1245521	1247101	1581	+			COG1629	putative TonB-dependent receptor
AMODNKIM_01224	CDS	1247218	1248864	1647	+	eptA_1	2.7.-.-	COG2194	Phosphoethanolamine transferase EptA
AMODNKIM_01225	CDS	1248940	1249059	120	-				hypothetical protein
AMODNKIM_01226	CDS	1249175	1249663	489	-				hypothetical protein
AMODNKIM_01227	CDS	1249753	1251126	1374	-				hypothetical protein
AMODNKIM_01228	CDS	1251545	1251823	279	-				hypothetical protein
AMODNKIM_01229	CDS	1251826	1252176	351	-				hypothetical protein
AMODNKIM_01230	CDS	1252173	1252562	390	-				hypothetical protein
AMODNKIM_01231	CDS	1252574	1253122	549	-				hypothetical protein
AMODNKIM_01232	CDS	1253119	1253553	435	-				hypothetical protein
AMODNKIM_01233	CDS	1253776	1254192	417	-				hypothetical protein
AMODNKIM_01234	CDS	1254205	1254927	723	-				hypothetical protein
AMODNKIM_01235	CDS	1255168	1255824	657	-			COG1974	putative HTH-type transcriptional regulator
AMODNKIM_01236	CDS	1255994	1256131	138	+				hypothetical protein
AMODNKIM_01237	CDS	1256186	1256482	297	+				hypothetical protein
AMODNKIM_01238	CDS	1256482	1257552	1071	+				hypothetical protein
AMODNKIM_01239	CDS	1257549	1258961	1413	+	dnaB_1	3.6.4.12	COG0305	Replicative DNA helicase
AMODNKIM_01240	CDS	1258958	1259236	279	+				hypothetical protein
AMODNKIM_01241	CDS	1259233	1259577	345	+				hypothetical protein
AMODNKIM_01242	CDS	1259567	1259989	423	+				hypothetical protein
AMODNKIM_01243	CDS	1259982	1260266	285	+				hypothetical protein
AMODNKIM_01244	CDS	1260268	1260648	381	+				hypothetical protein
AMODNKIM_01245	CDS	1260645	1260815	171	+				hypothetical protein
AMODNKIM_01246	CDS	1260815	1261312	498	+				hypothetical protein
AMODNKIM_01247	CDS	1261692	1261967	276	+				hypothetical protein
AMODNKIM_01248	tRNA	1262020	1262096	77	+				tRNA-Arg(tct)
AMODNKIM_01249	CDS	1262348	1262482	135	-				hypothetical protein
AMODNKIM_01250	CDS	1262677	1262895	219	+				hypothetical protein
AMODNKIM_01251	CDS	1262971	1263369	399	+				hypothetical protein
AMODNKIM_01252	CDS	1263385	1263915	531	+				hypothetical protein
AMODNKIM_01253	CDS	1264084	1264386	303	+				hypothetical protein
AMODNKIM_01254	CDS	1264660	1264884	225	+				hypothetical protein
AMODNKIM_01255	CDS	1264884	1265009	126	+				hypothetical protein
AMODNKIM_01256	CDS	1265031	1265513	483	+				hypothetical protein
AMODNKIM_01257	CDS	1265533	1265724	192	+				hypothetical protein
AMODNKIM_01258	CDS	1265896	1267590	1695	+				hypothetical protein
AMODNKIM_01259	CDS	1267587	1268813	1227	+				hypothetical protein
AMODNKIM_01260	CDS	1268806	1269468	663	+				hypothetical protein
AMODNKIM_01261	CDS	1269461	1270078	618	+				hypothetical protein
AMODNKIM_01262	CDS	1270075	1270680	606	+				hypothetical protein
AMODNKIM_01263	CDS	1270696	1271157	462	+				hypothetical protein
AMODNKIM_01264	CDS	1271160	1271669	510	+				hypothetical protein
AMODNKIM_01265	CDS	1271666	1272061	396	+				hypothetical protein
AMODNKIM_01266	CDS	1272012	1274846	2835	+				hypothetical protein
AMODNKIM_01267	CDS	1274900	1276936	2037	+				hypothetical protein
AMODNKIM_01268	CDS	1276938	1277162	225	+				hypothetical protein
AMODNKIM_01269	CDS	1277237	1277503	267	+				hypothetical protein
AMODNKIM_01270	CDS	1277487	1277996	510	+				hypothetical protein
AMODNKIM_01271	CDS	1277996	1278364	369	+				hypothetical protein
AMODNKIM_01272	CDS	1278598	1278792	195	+				hypothetical protein
AMODNKIM_01273	CDS	1278776	1280140	1365	-	xerC_1			Tyrosine recombinase XerC
AMODNKIM_01274	CDS	1280577	1280861	285	-				hypothetical protein
AMODNKIM_01275	CDS	1280858	1281418	561	-	smc_3			Chromosome partition protein Smc
AMODNKIM_01276	CDS	1281483	1282112	630	+				hypothetical protein
AMODNKIM_01277	CDS	1282180	1283502	1323	+	pepP	3.4.11.9	COG0006	Xaa-Pro aminopeptidase
AMODNKIM_01278	CDS	1283534	1284742	1209	+	ubiH	1.14.13.-	COG0654	2-octaprenyl-6-methoxyphenol hydroxylase
AMODNKIM_01279	CDS	1284739	1285971	1233	+	ubiI	1.14.13.240	COG0654	2-octaprenylphenol hydroxylase
AMODNKIM_01280	CDS	1286181	1286432	252	+				hypothetical protein
AMODNKIM_01281	CDS	1286487	1286888	402	-	zntR		COG0789	HTH-type transcriptional regulator ZntR
AMODNKIM_01282	CDS	1286954	1287595	642	+	czcD_1		COG1230	Cadmium, cobalt and zinc/H(+)-K(+) antiporter
AMODNKIM_01283	CDS	1287654	1288262	609	-	argO		COG1279	Arginine exporter protein ArgO
AMODNKIM_01284	CDS	1288364	1289254	891	+			COG0583	putative HTH-type transcriptional regulator
AMODNKIM_01285	CDS	1289257	1289643	387	-				hypothetical protein
AMODNKIM_01286	CDS	1289737	1290573	837	-	rsmI	2.1.1.198	COG0313	Ribosomal RNA small subunit methyltransferase I
AMODNKIM_01287	CDS	1290767	1291168	402	+				hypothetical protein
AMODNKIM_01288	CDS	1291249	1291956	708	+				hypothetical protein
AMODNKIM_01289	CDS	1291960	1292823	864	+	aes_1	3.1.1.-		Acetyl esterase
AMODNKIM_01290	CDS	1292846	1293589	744	-	nudC_2	3.6.1.22		NADH pyrophosphatase
AMODNKIM_01291	CDS	1293589	1295232	1644	-				hypothetical protein
AMODNKIM_01292	CDS	1295367	1296746	1380	-	rnhA	3.1.26.4		Ribonuclease H
AMODNKIM_01293	CDS	1296979	1300194	3216	+				hypothetical protein
AMODNKIM_01294	CDS	1300210	1302045	1836	+	oppA_1		COG4166	Oligopeptide-binding protein OppA
AMODNKIM_01295	CDS	1302075	1303127	1053	+	yejB		COG4174	Inner membrane ABC transporter permease protein YejB
AMODNKIM_01296	CDS	1303127	1304137	1011	+	yejE		COG4239	Inner membrane ABC transporter permease protein YejE
AMODNKIM_01297	CDS	1304115	1305704	1590	+	yejF		COG4172	putative ABC transporter ATP-binding protein YejF
AMODNKIM_01298	CDS	1305890	1307134	1245	+	namA_1	1.6.99.1		NADPH dehydrogenase
AMODNKIM_01299	CDS	1307193	1309307	2115	-	cntO_2			Metal-pseudopaline receptor CntO
AMODNKIM_01300	tRNA	1309491	1309566	76	-				tRNA-Glu(ttc)
AMODNKIM_01301	CDS	1309585	1310247	663	-	rnt	3.1.13.-	COG0847	Ribonuclease T
AMODNKIM_01302	CDS	1310232	1311266	1035	-	pyrC	3.5.2.3	COG0418	Dihydroorotase
AMODNKIM_01303	CDS	1311416	1312678	1263	+				hypothetical protein
AMODNKIM_01304	CDS	1312737	1314080	1344	-	argG	6.3.4.5	COG0137	Argininosuccinate synthase
AMODNKIM_01305	CDS	1314361	1316391	2031	+	fadH_1	1.3.1.34	COG0446	2,4-dienoyl-CoA reductase
AMODNKIM_01306	tRNA	1316477	1316566	90	+				tRNA-Ser(tga)
AMODNKIM_01307	CDS	1316834	1317394	561	+			COG3385	IS4 family transposase ISAba33
AMODNKIM_01308	CDS	1317391	1317927	537	+			COG3385	IS4 family transposase ISAba33
AMODNKIM_01309	CDS	1317869	1318297	429	-				hypothetical protein
AMODNKIM_01310	CDS	1318356	1319060	705	+				IS6 family transposase IS15
AMODNKIM_01311	CDS	1319228	1319629	402	+	tnpR			Transposon Tn3 resolvase
AMODNKIM_01312	CDS	1319812	1320672	861	+	bla	3.5.2.6		Beta-lactamase TEM
AMODNKIM_01313	CDS	1320920	1324360	3441	+				hypothetical protein
AMODNKIM_01314	CDS	1324471	1324950	480	+	hin		COG1961	DNA-invertase hin
AMODNKIM_01315	CDS	1324997	1325701	705	+				IS6 family transposase IS15
AMODNKIM_01316	CDS	1326126	1326941	816	-	neo_2	2.7.1.95		Aminoglycoside 3'-phosphotransferase
AMODNKIM_01317	CDS	1327071	1327775	705	+				IS6 family transposase IS15
AMODNKIM_01318	CDS	1327835	1328458	624	+	bm3R1_1			HTH-type transcriptional repressor Bm3R1
AMODNKIM_01319	CDS	1328523	1329245	723	-	yhhW_1	1.13.11.24	COG1741	Quercetin 2,3-dioxygenase
AMODNKIM_01320	CDS	1329756	1330718	963	+				hypothetical protein
AMODNKIM_01321	CDS	1330784	1331614	831	+	hcaB_2	1.3.1.87		3-phenylpropionate-dihydrodiol/cinnamic acid-dihydrodiol dehydrogenase
AMODNKIM_01322	CDS	1331638	1333188	1551	+		1.14.13.-	COG2072	Baeyer-Villiger monooxygenase
AMODNKIM_01323	CDS	1333557	1333784	228	+				hypothetical protein
AMODNKIM_01324	CDS	1334107	1335426	1320	+	adeP		COG2252	Adenine permease AdeP
AMODNKIM_01325	CDS	1335538	1336536	999	+		3.5.4.2	COG1816	Adenine deaminase
AMODNKIM_01326	CDS	1336580	1337137	558	-	yceJ_1		COG3038	Cytochrome b561
AMODNKIM_01327	CDS	1337376	1337765	390	+				hypothetical protein
AMODNKIM_01328	CDS	1337831	1338397	567	+	rnhB	3.1.26.4	COG0164	Ribonuclease HII
AMODNKIM_01329	CDS	1338467	1338721	255	-	csrA			Translational regulator CsrA
AMODNKIM_01330	CDS	1338968	1340248	1281	-		2.7.2.4	COG0527	Aspartate kinase
AMODNKIM_01331	CDS	1340314	1342950	2637	-	alaS	6.1.1.7	COG0013	Alanine--tRNA ligase
AMODNKIM_01332	CDS	1343220	1344245	1026	+	epd	1.2.1.72	COG0057	D-erythrose-4-phosphate dehydrogenase
AMODNKIM_01333	CDS	1344521	1345687	1167	+	hisZ		COG3705	ATP phosphoribosyltransferase regulatory subunit
AMODNKIM_01334	CDS	1345752	1347071	1320	+	purA	6.3.4.4	COG0104	Adenylosuccinate synthetase
AMODNKIM_01335	CDS	1347194	1347511	318	+				hypothetical protein
AMODNKIM_01336	CDS	1347622	1348407	786	+	loiP	3.4.24.-	COG0501	Metalloprotease LoiP
AMODNKIM_01337	CDS	1348467	1349516	1050	-	tas		COG0667	Protein tas
AMODNKIM_01338	CDS	1349761	1350195	435	-			COG3385	IS4 family transposase ISAba1
AMODNKIM_01339	CDS	1350282	1350851	570	-			COG3385	IS4 family transposase ISAba33
AMODNKIM_01340	CDS	1350908	1351573	666	-	vfr		COG0664	Cyclic AMP receptor-like protein
AMODNKIM_01341	CDS	1352012	1352434	423	+	yhfA		COG1765	Protein YhfA
AMODNKIM_01342	CDS	1352526	1352951	426	+	phnO	2.3.1.280		Aminoalkylphosphonate N-acetyltransferase
AMODNKIM_01343	CDS	1352948	1353754	807	-				hypothetical protein
AMODNKIM_01344	CDS	1354056	1356635	2580	+	clpB		COG0542	Chaperone protein ClpB
AMODNKIM_01345	CDS	1356692	1357180	489	-	pncC	3.5.1.42	COG1058	Nicotinamide-nucleotide amidohydrolase PncC
AMODNKIM_01346	CDS	1357446	1357865	420	+				hypothetical protein
AMODNKIM_01347	CDS	1357891	1360095	2205	-	rlmL		COG0116	Ribosomal RNA large subunit methyltransferase K/L
AMODNKIM_01348	CDS	1360334	1360678	345	+				hypothetical protein
AMODNKIM_01349	CDS	1360802	1361818	1017	+	pyrB	2.1.3.2		Aspartate carbamoyltransferase
AMODNKIM_01350	CDS	1361831	1363066	1236	+	pyrC'		COG0044	Dihydroorotase-like protein
AMODNKIM_01351	CDS	1363280	1364695	1416	+	pal_1			Peptidoglycan-associated lipoprotein
AMODNKIM_01352	CDS	1364782	1365561	780	+				hypothetical protein
AMODNKIM_01353	CDS	1365572	1366198	627	-	gstB_1	2.5.1.18	COG0625	Glutathione S-transferase GstB
AMODNKIM_01354	CDS	1366369	1367085	717	-	trmB_2	2.1.1.33	COG0220	tRNA (guanine-N(7)-)-methyltransferase
AMODNKIM_01355	CDS	1367231	1369669	2439	+				hypothetical protein
AMODNKIM_01356	CDS	1369877	1370488	612	+	gstB_2	2.5.1.18	COG0625	Glutathione S-transferase GST-6.0
AMODNKIM_01357	CDS	1370552	1370896	345	-				hypothetical protein
AMODNKIM_01358	CDS	1371070	1372635	1566	-	ahpF_1	1.8.1.-	COG3634	Alkyl hydroperoxide reductase subunit F
AMODNKIM_01359	CDS	1372897	1373115	219	+				hypothetical protein
AMODNKIM_01360	CDS	1373152	1373739	588	+	trmR	2.1.1.-	COG4122	tRNA 5-hydroxyuridine methyltransferase
AMODNKIM_01361	CDS	1373804	1374019	216	-				hypothetical protein
AMODNKIM_01362	CDS	1374212	1374775	564	-	ahpC	1.11.1.15	COG0450	Alkyl hydroperoxide reductase C
AMODNKIM_01363	CDS	1375128	1378985	3858	+				hypothetical protein
AMODNKIM_01364	CDS	1379080	1380186	1107	+		2.3.1.207	COG0332	Beta-ketodecanoyl-[acyl-carrier-protein] synthase
AMODNKIM_01365	CDS	1380287	1381549	1263	-				hypothetical protein
AMODNKIM_01366	CDS	1381594	1382952	1359	-	pcaK_1		COG0477	4-hydroxybenzoate transporter PcaK
AMODNKIM_01367	CDS	1383418	1384611	1194	-	ydcO_1		COG3135	Inner membrane protein YdcO
AMODNKIM_01368	CDS	1384669	1385454	786	-	lvr	1.1.1.-		Levodione reductase
AMODNKIM_01369	CDS	1385476	1386492	1017	-	benC		COG0543	Benzoate 1,2-dioxygenase electron transfer component
AMODNKIM_01370	CDS	1386563	1387063	501	-	cbdB_1	1.14.12.13		2-halobenzoate 1,2-dioxygenase small subunit
AMODNKIM_01371	CDS	1387060	1388442	1383	-	cbdA	1.14.12.13		2-halobenzoate 1,2-dioxygenase large subunit
AMODNKIM_01372	CDS	1388725	1389684	960	+	benM_2			HTH-type transcriptional regulator BenM
AMODNKIM_01373	CDS	1389734	1389928	195	-				hypothetical protein
AMODNKIM_01374	CDS	1390101	1392572	2472	+	actP_1	7.2.2.9		Copper-transporting P-type ATPase
AMODNKIM_01375	CDS	1392648	1393049	402	+	hmrR_2			HTH-type transcriptional regulator HmrR
AMODNKIM_01376	CDS	1393077	1393484	408	+		4.4.1.22		Putative glutathione-dependent formaldehyde-activating enzyme
AMODNKIM_01377	CDS	1394077	1394433	357	-	yhjQ		COG1145	putative cysteine-rich protein YhjQ
AMODNKIM_01378	CDS	1394913	1395242	330	-				hypothetical protein
AMODNKIM_01379	CDS	1395684	1396277	594	+				hypothetical protein
AMODNKIM_01380	CDS	1396328	1396552	225	+				hypothetical protein
AMODNKIM_01381	CDS	1396777	1396971	195	-				hypothetical protein
AMODNKIM_01382	CDS	1396964	1398226	1263	-	xseA	3.1.11.6	COG1570	Exodeoxyribonuclease 7 large subunit
AMODNKIM_01383	tRNA	1398482	1398558	77	+				tRNA-Met(cat)
AMODNKIM_01384	CDS	1398732	1398965	234	+				hypothetical protein
AMODNKIM_01385	CDS	1399117	1399788	672	-	prtR_2		COG2932	HTH-type transcriptional regulator PrtR
AMODNKIM_01386	CDS	1400096	1400221	126	+				hypothetical protein
AMODNKIM_01387	CDS	1400389	1400778	390	+				hypothetical protein
AMODNKIM_01388	CDS	1400816	1401361	546	+				hypothetical protein
AMODNKIM_01389	CDS	1401428	1402045	618	-	rhtB_2		COG1280	Homoserine/homoserine lactone efflux protein
AMODNKIM_01390	CDS	1402565	1402780	216	+	cspV		COG1278	Cold shock protein CspV
AMODNKIM_01391	CDS	1402984	1403208	225	+				hypothetical protein
AMODNKIM_01392	CDS	1403488	1404303	816	+	proC_2	1.5.1.2	COG0345	Pyrroline-5-carboxylate reductase
AMODNKIM_01393	CDS	1404460	1404579	120	-				hypothetical protein
AMODNKIM_01394	CDS	1405064	1405522	459	+				hypothetical protein
AMODNKIM_01395	CDS	1405814	1406158	345	+				hypothetical protein
AMODNKIM_01396	CDS	1406256	1407362	1107	+				hypothetical protein
AMODNKIM_01397	CDS	1407357	1408571	1215	-	sotB			sugar efflux transporter
AMODNKIM_01398	CDS	1408683	1409129	447	+				hypothetical protein
AMODNKIM_01399	CDS	1409216	1409545	330	+				hypothetical protein
AMODNKIM_01400	CDS	1409559	1409705	147	+				hypothetical protein
AMODNKIM_01401	CDS	1410285	1410878	594	+				hypothetical protein
AMODNKIM_01402	CDS	1411263	1411892	630	+				hypothetical protein
AMODNKIM_01403	tRNA	1412254	1412329	76	-				tRNA-Gly(gcc)
AMODNKIM_01404	CDS	1412393	1413814	1422	-	cysS	6.1.1.16	COG0215	Cysteine--tRNA ligase
AMODNKIM_01405	CDS	1414028	1415005	978	+	kdsD	5.3.1.13	COG0517	Arabinose 5-phosphate isomerase KdsD
AMODNKIM_01406	CDS	1415009	1415548	540	+	kdsC	3.1.3.45	COG1778	3-deoxy-D-manno-octulosonate 8-phosphate phosphatase KdsC
AMODNKIM_01407	CDS	1415586	1416134	549	+	lptC			Lipopolysaccharide export system protein LptC
AMODNKIM_01408	CDS	1416118	1416666	549	+	lptA		COG1934	Lipopolysaccharide export system protein LptA
AMODNKIM_01409	CDS	1416666	1417412	747	+	lptB	3.6.3.-	COG1137	Lipopolysaccharide export system ATP-binding protein LptB
AMODNKIM_01410	CDS	1417687	1419153	1467	+				hypothetical protein
AMODNKIM_01411	CDS	1419150	1421291	2142	+	ltxB	7.4.2.5	COG2274	Leukotoxin export ATP-binding protein LtxB
AMODNKIM_01412	CDS	1421288	1422478	1191	+	prsE			Type I secretion system membrane fusion protein PrsE
AMODNKIM_01413	CDS	1422571	1423170	600	+	yigZ		COG1739	IMPACT family member YigZ
AMODNKIM_01414	CDS	1423163	1423774	612	+		2.3.1.-	COG0110	Putative acetyltransferase
AMODNKIM_01415	CDS	1423930	1424772	843	+				hypothetical protein
AMODNKIM_01416	CDS	1424889	1425557	669	-		2.1.1.6	COG4122	Catechol O-methyltransferase
AMODNKIM_01417	CDS	1425697	1426398	702	-				hypothetical protein
AMODNKIM_01418	CDS	1426549	1426872	324	-			COG1146	Ferredoxin 1
AMODNKIM_01419	CDS	1427217	1427792	576	-				hypothetical protein
AMODNKIM_01420	CDS	1427812	1430457	2646	-	mutS		COG0249	DNA mismatch repair protein MutS
AMODNKIM_01421	CDS	1430732	1431199	468	-	lrp_2		COG1522	Leucine-responsive regulatory protein
AMODNKIM_01422	CDS	1431318	1432178	861	+	rhtA_1		COG5006	Threonine/homoserine exporter RhtA
AMODNKIM_01423	CDS	1432829	1434034	1206	+				hypothetical protein
AMODNKIM_01424	CDS	1434165	1435097	933	+	lpxP	2.3.1.242	COG1560	Lipid A biosynthesis palmitoleoyltransferase
AMODNKIM_01425	CDS	1435684	1436325	642	+	betI_5			HTH-type transcriptional regulator BetI
AMODNKIM_01426	CDS	1436589	1437893	1305	+	pcaK_2		COG0477	4-hydroxybenzoate transporter PcaK
AMODNKIM_01427	CDS	1437988	1438425	438	-				hypothetical protein
AMODNKIM_01428	CDS	1438763	1439791	1029	-				hypothetical protein
AMODNKIM_01429	CDS	1440001	1440699	699	-				hypothetical protein
AMODNKIM_01430	CDS	1440951	1441901	951	+	lcdH	1.1.1.108		L-carnitine dehydrogenase
AMODNKIM_01431	CDS	1442506	1442964	459	+				hypothetical protein
AMODNKIM_01432	CDS	1443059	1443490	432	-				hypothetical protein
AMODNKIM_01433	CDS	1443620	1444297	678	-	mupP_2	3.1.3.105	COG0546	N-acetylmuramic acid 6-phosphate phosphatase
AMODNKIM_01434	CDS	1444461	1445705	1245	-				hypothetical protein
AMODNKIM_01435	CDS	1446328	1449504	3177	+				hypothetical protein
AMODNKIM_01436	CDS	1449514	1454421	4908	+				hypothetical protein
AMODNKIM_01437	CDS	1454438	1454968	531	+				hypothetical protein
AMODNKIM_01438	CDS	1455400	1455717	318	+				hypothetical protein
AMODNKIM_01439	CDS	1456001	1456912	912	+	gltR_2		COG0583	HTH-type transcriptional regulator GltR
AMODNKIM_01440	CDS	1457278	1458510	1233	+				hypothetical protein
AMODNKIM_01441	CDS	1458545	1459309	765	+	pxpA	3.5.2.9		5-oxoprolinase subunit A
AMODNKIM_01442	CDS	1459321	1460127	807	+		4.2.1.-	COG4336	Putative hydro-lyase
AMODNKIM_01443	CDS	1460160	1461743	1584	+				hypothetical protein
AMODNKIM_01444	CDS	1461743	1463461	1719	+	carB_1			Carbamoyl-phosphate synthase large chain
AMODNKIM_01445	CDS	1463763	1464983	1221	+	eriC		COG0038	Chloride/fluoride channel protein
AMODNKIM_01446	CDS	1465093	1466001	909	+	esiB_1			Secretory immunoglobulin A-binding protein EsiB
AMODNKIM_01447	CDS	1466135	1466485	351	+				hypothetical protein
AMODNKIM_01448	CDS	1466682	1466984	303	-				hypothetical protein
AMODNKIM_01449	CDS	1467057	1467485	429	+				hypothetical protein
AMODNKIM_01450	CDS	1467662	1468222	561	+				hypothetical protein
AMODNKIM_01451	CDS	1468282	1468713	432	-				hypothetical protein
AMODNKIM_01452	CDS	1468966	1470129	1164	+		1.1.1.1	COG1063	putative zinc-binding alcohol dehydrogenase
AMODNKIM_01453	CDS	1470443	1471183	741	+				hypothetical protein
AMODNKIM_01454	CDS	1471199	1471852	654	+				hypothetical protein
AMODNKIM_01455	CDS	1471855	1475460	3606	+	ddl_1	6.3.2.4		D-alanine--D-alanine ligase
AMODNKIM_01456	CDS	1475499	1476035	537	-	kefF_1	1.6.5.2	COG2249	Glutathione-regulated potassium-efflux system ancillary protein KefF
AMODNKIM_01457	CDS	1476128	1476331	204	+				hypothetical protein
AMODNKIM_01458	CDS	1476569	1477108	540	+				hypothetical protein
AMODNKIM_01459	CDS	1477280	1477405	126	+				hypothetical protein
AMODNKIM_01460	CDS	1477410	1477844	435	+				Putative nickel-responsive regulator
AMODNKIM_01461	CDS	1477857	1479668	1812	+	atzF	3.5.1.54		Allophanate hydrolase
AMODNKIM_01462	CDS	1479665	1480687	1023	+				hypothetical protein
AMODNKIM_01463	CDS	1480739	1481620	882	-	ssuB_2	3.6.3.-	COG1116	Aliphatic sulfonates import ATP-binding protein SsuB
AMODNKIM_01464	CDS	1481620	1482564	945	-				hypothetical protein
AMODNKIM_01465	CDS	1482660	1483061	402	-				hypothetical protein
AMODNKIM_01466	CDS	1484159	1484842	684	+				hypothetical protein
AMODNKIM_01467	CDS	1484859	1485362	504	+				hypothetical protein
AMODNKIM_01468	CDS	1485355	1486836	1482	+				hypothetical protein
AMODNKIM_01469	CDS	1486886	1487389	504	+	hcp1		COG3157	Protein hcp1
AMODNKIM_01470	CDS	1487469	1487945	477	+				hypothetical protein
AMODNKIM_01471	CDS	1487962	1489773	1812	+				hypothetical protein
AMODNKIM_01472	CDS	1489737	1490735	999	+				hypothetical protein
AMODNKIM_01473	CDS	1490732	1492144	1413	+				hypothetical protein
AMODNKIM_01474	CDS	1492175	1495999	3825	+				hypothetical protein
AMODNKIM_01475	CDS	1496001	1496996	996	+				hypothetical protein
AMODNKIM_01476	CDS	1496999	1497766	768	+	ompA_2			Outer membrane protein A
AMODNKIM_01477	CDS	1497783	1498046	264	+				hypothetical protein
AMODNKIM_01478	CDS	1498269	1500947	2679	+	clpV1		COG0542	Protein ClpV1
AMODNKIM_01479	CDS	1500971	1502065	1095	+				hypothetical protein
AMODNKIM_01480	CDS	1502082	1503446	1365	+				hypothetical protein
AMODNKIM_01481	CDS	1503464	1504270	807	+				hypothetical protein
AMODNKIM_01482	CDS	1504283	1504885	603	+				hypothetical protein
AMODNKIM_01483	CDS	1504893	1505846	954	+				hypothetical protein
AMODNKIM_01484	CDS	1505849	1506700	852	-	gltC_1			HTH-type transcriptional regulator GltC
AMODNKIM_01485	CDS	1506852	1507520	669	+				hypothetical protein
AMODNKIM_01486	CDS	1507536	1508018	483	+	guaD_1	3.5.4.3	COG0590	Guanine deaminase
AMODNKIM_01487	CDS	1508018	1509196	1179	+	nimT		COG2807	2-nitroimidazole transporter
AMODNKIM_01488	CDS	1509330	1510487	1158	+				hypothetical protein
AMODNKIM_01489	CDS	1510567	1511025	459	-	wecD	2.3.1.210		dTDP-fucosamine acetyltransferase
AMODNKIM_01490	CDS	1511340	1511909	570	-	queH	1.17.99.6	COG1636	Epoxyqueuosine reductase QueH
AMODNKIM_01491	CDS	1512426	1512713	288	+				hypothetical protein
AMODNKIM_01492	CDS	1512888	1513322	435	-			COG3385	IS4 family transposase ISAba1
AMODNKIM_01493	CDS	1513409	1513978	570	-			COG3385	IS4 family transposase ISAba33
AMODNKIM_01494	CDS	1514092	1514544	453	+	soxR		COG0789	Redox-sensitive transcriptional activator SoxR
AMODNKIM_01495	CDS	1514706	1515140	435	+				hypothetical protein
AMODNKIM_01496	CDS	1515341	1515439	99	+				hypothetical protein
AMODNKIM_01497	CDS	1516001	1516936	936	+	dapA_3	4.3.3.7	COG0329	4-hydroxy-tetrahydrodipicolinate synthase
AMODNKIM_01498	CDS	1516994	1517902	909	-				hypothetical protein
AMODNKIM_01499	CDS	1518320	1519003	684	+	glaR		COG1802	HTH-type transcriptional repressor GlaR
AMODNKIM_01500	CDS	1519172	1520104	933	+		5.1.1.8		4-hydroxyproline 2-epimerase
AMODNKIM_01501	CDS	1520101	1521204	1104	+	hcnC	1.4.99.5	COG0665	Hydrogen cyanide synthase subunit HcnC
AMODNKIM_01502	CDS	1521205	1521435	231	+	hcnA	1.4.99.5	COG0446	Hydrogen cyanide synthase subunit HcnA
AMODNKIM_01503	CDS	1521435	1522697	1263	+	hcnB	1.4.99.5		Hydrogen cyanide synthase subunit HcnB
AMODNKIM_01504	CDS	1522742	1523494	753	+	rhaS_1			HTH-type transcriptional activator RhaS
AMODNKIM_01505	CDS	1523560	1524849	1290	-	abaF_2			Fosfomycin resistance protein AbaF
AMODNKIM_01506	CDS	1525008	1526588	1581	-		1.2.1.26		Alpha-ketoglutaric semialdehyde dehydrogenase
AMODNKIM_01507	CDS	1526741	1528312	1572	-	yveA		COG0531	Aspartate-proton symporter
AMODNKIM_01508	CDS	1528762	1530141	1380	+	sdaA	4.3.1.17	COG1760	L-serine dehydratase 1
AMODNKIM_01509	CDS	1530185	1532287	2103	-	paaZ		COG2030	Bifunctional protein PaaZ
AMODNKIM_01510	CDS	1532553	1533491	939	+	paaA	1.14.13.149	COG3396	1,2-phenylacetyl-CoA epoxidase, subunit A
AMODNKIM_01511	CDS	1533524	1533814	291	+	paaB		COG3460	1,2-phenylacetyl-CoA epoxidase, subunit B
AMODNKIM_01512	CDS	1533827	1534582	756	+	paaC		COG3396	1,2-phenylacetyl-CoA epoxidase, subunit C
AMODNKIM_01513	CDS	1534599	1535099	501	+	paaD		COG2151	Putative 1,2-phenylacetyl-CoA epoxidase, subunit D
AMODNKIM_01514	CDS	1535123	1536184	1062	+	paaE	1.-.-.-	COG1018	1,2-phenylacetyl-CoA epoxidase, subunit E
AMODNKIM_01515	CDS	1536193	1536966	774	+	paaF_2	4.2.1.17	COG1024	2,3-dehydroadipyl-CoA hydratase
AMODNKIM_01516	CDS	1536966	1537757	792	+	paaG	5.3.3.18	COG1024	1,2-epoxyphenylacetyl-CoA isomerase
AMODNKIM_01517	CDS	1537760	1539298	1539	+	paaH_1	1.1.1.-	COG1250	3-hydroxyadipyl-CoA dehydrogenase
AMODNKIM_01518	CDS	1539311	1540519	1209	+	paaJ	2.3.1.174	COG0183	3-oxoadipyl-CoA/3-oxo-5,6-dehydrosuberyl-CoA thiolase
AMODNKIM_01519	CDS	1540560	1541849	1290	+	paaK	6.2.1.30	COG1541	Phenylacetate-coenzyme A ligase
AMODNKIM_01520	CDS	1541903	1542868	966	+	paaX		COG3327	Transcriptional repressor PaaX
AMODNKIM_01521	CDS	1542855	1543460	606	+	yrdA_2		COG0663	Protein YrdA
AMODNKIM_01522	CDS	1543538	1543921	384	+	paaI	3.1.2.-	COG2050	Acyl-coenzyme A thioesterase PaaI
AMODNKIM_01523	CDS	1544100	1544597	498	+				hypothetical protein
AMODNKIM_01524	CDS	1544572	1545420	849	+				hypothetical protein
AMODNKIM_01525	CDS	1545475	1546671	1197	-				hypothetical protein
AMODNKIM_01526	CDS	1546726	1547061	336	-				hypothetical protein
AMODNKIM_01527	CDS	1548134	1548736	603	+				hypothetical protein
AMODNKIM_01528	CDS	1548937	1549563	627	+				hypothetical protein
AMODNKIM_01529	CDS	1549682	1550746	1065	+	srpA	1.11.1.-	COG0753	Catalase-related peroxidase
AMODNKIM_01530	CDS	1550759	1551331	573	+	yceJ_2		COG3038	Cytochrome b561
AMODNKIM_01531	CDS	1551471	1551755	285	-				hypothetical protein
AMODNKIM_01532	CDS	1551818	1552480	663	-				hypothetical protein
AMODNKIM_01533	CDS	1552633	1553235	603	+				hypothetical protein
AMODNKIM_01534	CDS	1553204	1553995	792	+	tgnD	3.5.1.-		(E)-2-((N-methylformamido)methylene)succinate hydrolase
AMODNKIM_01535	CDS	1554026	1554958	933	+	tgnA	1.5.1.36	COG1853	Flavin-dependent trigonelline monooxygenase, reductase component
AMODNKIM_01536	CDS	1554961	1555998	1038	+	tgnB	1.14.14.-	COG2141	Flavin-dependent trigonelline monooxygenase, oxygenase component
AMODNKIM_01537	CDS	1556010	1557479	1470	+	tgnC	1.2.1.-	COG1012	(Z)-2-((N-methylformamido)methylene)-5-hydroxybutyrolactone dehydrogenase
AMODNKIM_01538	CDS	1557784	1559190	1407	+				hypothetical protein
AMODNKIM_01539	CDS	1559216	1560385	1170	+				hypothetical protein
AMODNKIM_01540	CDS	1560524	1561981	1458	+	tgnE	1.2.1.24	COG1012	Succinate semialdehyde dehydrogenase
AMODNKIM_01541	CDS	1561978	1562361	384	+				hypothetical protein
AMODNKIM_01542	CDS	1562425	1563330	906	-	pgrR_2			HTH-type transcriptional regulator PgrR
AMODNKIM_01543	CDS	1563429	1564025	597	+	azoR	1.7.1.17	COG1182	FMN-dependent NADH-azoreductase
AMODNKIM_01544	CDS	1564082	1564897	816	-	pobR		COG1414	p-hydroxybenzoate hydroxylase transcriptional activator
AMODNKIM_01545	CDS	1565039	1566253	1215	+	pobA	1.14.13.2		p-hydroxybenzoate hydroxylase
AMODNKIM_01546	CDS	1566429	1567151	723	+	phnR		COG2188	Putative transcriptional regulator of 2-aminoethylphosphonate degradation operons
AMODNKIM_01547	CDS	1567243	1568280	1038	+			COG1840	putative protein
AMODNKIM_01548	CDS	1568303	1569505	1203	+	btuD_1	7.6.2.8		Vitamin B12 import ATP-binding protein BtuD
AMODNKIM_01549	CDS	1569499	1571208	1710	+				hypothetical protein
AMODNKIM_01550	CDS	1571310	1572464	1155	+	soxA	1.5.3.1		Monomeric sarcosine oxidase
AMODNKIM_01551	CDS	1572491	1573678	1188	+	phnW	2.6.1.37	COG0075	2-aminoethylphosphonate--pyruvate transaminase
AMODNKIM_01552	CDS	1573705	1574520	816	+	phnX	3.11.1.1	COG0637	Phosphonoacetaldehyde hydrolase
AMODNKIM_01553	CDS	1574735	1575985	1251	-	yjhB_2			Putative metabolite transport protein YjhB
AMODNKIM_01554	CDS	1576047	1577198	1152	-	carC_1	1.3.1.108	COG1960	Caffeyl-CoA reductase-Etf complex subunit CarC
AMODNKIM_01555	CDS	1577530	1578747	1218	+	uctC_2	2.8.3.19		Acetyl-CoA:oxalate CoA-transferase
AMODNKIM_01556	CDS	1578928	1579779	852	+	tsaQ1_1			HTH-type transcriptional regulator TsaQ1/TsaQ2
AMODNKIM_01557	CDS	1579847	1580656	810	-	paaF_3	4.2.1.17	COG1024	2,3-dehydroadipyl-CoA hydratase
AMODNKIM_01558	CDS	1580878	1581849	972	+		1.6.5.11	COG2070	NADH:quinone reductase
AMODNKIM_01559	CDS	1581885	1583069	1185	-				putative transporter
AMODNKIM_01560	CDS	1583121	1583963	843	-	tsaQ1_2			HTH-type transcriptional regulator TsaQ1/TsaQ2
AMODNKIM_01561	CDS	1584073	1585278	1206	-	pcaF_1	2.3.1.174	COG0183	Beta-ketoadipyl-CoA thiolase
AMODNKIM_01562	CDS	1585293	1586816	1524	-	paaH_2	1.1.1.-	COG1250	3-hydroxyadipyl-CoA dehydrogenase
AMODNKIM_01563	CDS	1586878	1587639	762	-	bacC_1	1.1.1.385		Dihydroanticapsin 7-dehydrogenase
AMODNKIM_01564	CDS	1587669	1588457	789	-	paaF_4	4.2.1.17	COG1024	2,3-dehydroadipyl-CoA hydratase
AMODNKIM_01565	CDS	1588769	1589923	1155	+	mmgC_3	1.3.99.-	COG1960	Acyl-CoA dehydrogenase
AMODNKIM_01566	CDS	1589952	1591265	1314	+	yjhB_3			Putative metabolite transport protein YjhB
AMODNKIM_01567	CDS	1591313	1591981	669	+	pcaI_1	2.8.3.6	COG1788	3-oxoadipate CoA-transferase subunit A
AMODNKIM_01568	CDS	1591981	1592634	654	+	pcaJ_1	2.8.3.6	COG2057	3-oxoadipate CoA-transferase subunit B
AMODNKIM_01569	CDS	1592671	1593987	1317	+				hypothetical protein
AMODNKIM_01570	CDS	1594006	1595223	1218	+				putative transporter
AMODNKIM_01571	CDS	1595244	1595678	435	-				hypothetical protein
AMODNKIM_01572	CDS	1595998	1597800	1803	+	dmdC_1	1.3.8.-	COG1960	3-methylmercaptopropionyl-CoA dehydrogenase
AMODNKIM_01573	CDS	1597997	1598800	804	+				hypothetical protein
AMODNKIM_01574	CDS	1598862	1602344	3483	-				hypothetical protein
AMODNKIM_01575	CDS	1602549	1603490	942	+	dmlR_2			HTH-type transcriptional regulator DmlR
AMODNKIM_01576	CDS	1603742	1604644	903	-	liuE	4.1.3.26	COG0119	3-hydroxy-3-isohexenylglutaryl-CoA/hydroxy-methylglutaryl-CoA lyase
AMODNKIM_01577	CDS	1604641	1606632	1992	-	accA1_1		COG4770	Acetyl-/propionyl-coenzyme A carboxylase alpha chain
AMODNKIM_01578	CDS	1606644	1607447	804	-	dpgD	4.2.1.17		Enoyl-CoA-hydratase
AMODNKIM_01579	CDS	1607457	1609058	1602	-		2.1.3.1	COG4799	Methylmalonyl-CoA carboxyltransferase 12S subunit
AMODNKIM_01580	CDS	1609083	1610255	1173	-	mmgC_4	1.3.99.-	COG1960	Acyl-CoA dehydrogenase
AMODNKIM_01581	CDS	1610400	1611017	618	+	betI_6			HTH-type transcriptional regulator BetI
AMODNKIM_01582	CDS	1611129	1612823	1695	+	fadD3	6.2.1.41	COG0318	3-[(3aS,4S,7aS)-7a-methyl-1,5-dioxo-octahydro-1H-inden-4-yl]propanoyl:CoA ligase
AMODNKIM_01583	CDS	1612894	1613565	672	+	cmoA	2.1.3.-	COG0500	Carboxy-S-adenosyl-L-methionine synthase
AMODNKIM_01584	CDS	1613806	1615092	1287	+				hypothetical protein
AMODNKIM_01585	CDS	1615138	1616376	1239	-				hypothetical protein
AMODNKIM_01586	CDS	1616488	1617393	906	+	dmlR_3			HTH-type transcriptional regulator DmlR
AMODNKIM_01587	CDS	1617395	1617685	291	-				hypothetical protein
AMODNKIM_01588	CDS	1617814	1617960	147	-				hypothetical protein
AMODNKIM_01589	CDS	1618655	1618798	144	+				hypothetical protein
AMODNKIM_01590	CDS	1619068	1619496	429	+				hypothetical protein
AMODNKIM_01591	CDS	1619584	1619805	222	+				hypothetical protein
AMODNKIM_01592	CDS	1619890	1620207	318	-				hypothetical protein
AMODNKIM_01593	CDS	1620313	1620534	222	-				hypothetical protein
AMODNKIM_01594	CDS	1620819	1621298	480	-	cinA			Putative competence-damage inducible protein
AMODNKIM_01595	CDS	1621614	1623023	1410	+				hypothetical protein
AMODNKIM_01596	CDS	1623084	1625222	2139	+	katE	1.11.1.6	COG0753	Catalase HPII
AMODNKIM_01597	CDS	1625279	1626157	879	-	ydaD	1.-.-.-		General stress protein 39
AMODNKIM_01598	CDS	1626299	1626712	414	-				hypothetical protein
AMODNKIM_01599	CDS	1627197	1628369	1173	+				hypothetical protein
AMODNKIM_01600	CDS	1628430	1628666	237	-				hypothetical protein
AMODNKIM_01601	CDS	1628949	1629560	612	+	lexA	3.4.21.88		LexA repressor
AMODNKIM_01602	CDS	1629631	1630242	612	-	rhtB_3		COG1280	Homoserine/homoserine lactone efflux protein
AMODNKIM_01603	CDS	1630399	1630854	456	+	lrp_3		COG1522	Leucine-responsive regulatory protein
AMODNKIM_01604	CDS	1630913	1632529	1617	-				hypothetical protein
AMODNKIM_01605	CDS	1632725	1636189	3465	+	rcsC_2	2.7.13.3		Sensor histidine kinase RcsC
AMODNKIM_01606	CDS	1636186	1637145	960	+	rcsC_3	2.7.13.3		Sensor histidine kinase RcsC
AMODNKIM_01607	CDS	1637289	1637573	285	+	yjdJ		COG2388	putative protein YjdJ
AMODNKIM_01608	CDS	1637861	1638520	660	+	glnM		COG0765	putative glutamine ABC transporter permease protein GlnM
AMODNKIM_01609	CDS	1638510	1639175	666	+	glnP		COG0765	putative glutamine ABC transporter permease protein GlnP
AMODNKIM_01610	CDS	1639178	1639909	732	+	glnQ_1			Glutamine transport ATP-binding protein GlnQ
AMODNKIM_01611	CDS	1639940	1640800	861	+	glnH_1		COG0834	ABC transporter glutamine-binding protein GlnH
AMODNKIM_01612	CDS	1640883	1641749	867	+	glnH_2		COG0834	ABC transporter glutamine-binding protein GlnH
AMODNKIM_01613	CDS	1641997	1642932	936	-	dmlR_4			HTH-type transcriptional regulator DmlR
AMODNKIM_01614	CDS	1643024	1643662	639	+	rhtC_3		COG1280	Threonine efflux protein
AMODNKIM_01615	CDS	1644129	1646090	1962	-	sufS	4.4.1.16		Cysteine desulfurase
AMODNKIM_01616	CDS	1646065	1646997	933	-	mmpI			Major membrane protein I
AMODNKIM_01617	CDS	1647238	1648161	924	-	lpxD_1	2.3.1.191		UDP-3-O-(3-hydroxymyristoyl)glucosamine N-acyltransferase
AMODNKIM_01618	CDS	1648198	1648707	510	-	glpE_1	2.8.1.1		Thiosulfate sulfurtransferase GlpE
AMODNKIM_01619	CDS	1648946	1649683	738	-	fabG_5	1.1.1.100		3-oxoacyl-[acyl-carrier-protein] reductase FabG
AMODNKIM_01620	CDS	1649809	1650729	921	+	dmlR_5			HTH-type transcriptional regulator DmlR
AMODNKIM_01621	CDS	1650767	1651627	861	-	yghU	1.8.4.-	COG0625	Disulfide-bond oxidoreductase YghU
AMODNKIM_01622	CDS	1651661	1652287	627	-	yfcF	2.5.1.18	COG0625	Glutathione S-transferase YfcF
AMODNKIM_01623	CDS	1652407	1653312	906	-	gltC_2			HTH-type transcriptional regulator GltC
AMODNKIM_01624	CDS	1653423	1653854	432	+	cidA			Holin-like protein CidA
AMODNKIM_01625	CDS	1653868	1654557	690	+	cidB_1		COG1346	Holin-like protein CidB
AMODNKIM_01626	CDS	1654565	1656055	1491	-	gabR_3		COG1167	HTH-type transcriptional regulatory protein GabR
AMODNKIM_01627	CDS	1656171	1656806	636	+	paiB		COG2808	Protease synthase and sporulation protein PAI 2
AMODNKIM_01628	CDS	1656849	1657442	594	+				hypothetical protein
AMODNKIM_01629	CDS	1657450	1658637	1188	-	rfnT			Riboflavin transporter RfnT
AMODNKIM_01630	CDS	1659042	1660721	1680	+	madA	2.3.1.187		Acetyl-S-ACP:malonate ACP transferase
AMODNKIM_01631	CDS	1660721	1661605	885	+	citG	2.4.2.52	COG1767	2-(5''-triphosphoribosyl)-3'-dephosphocoenzyme-A synthase
AMODNKIM_01632	CDS	1661608	1661907	300	+	mdcC			Malonate decarboxylase acyl carrier protein
AMODNKIM_01633	CDS	1661900	1662751	852	+	madC	2.1.3.10		Malonyl-S-ACP:biotin-protein carboxyltransferase MADC
AMODNKIM_01634	CDS	1662748	1663575	828	+				hypothetical protein
AMODNKIM_01635	CDS	1663572	1664174	603	+	mdcG	2.7.7.66		Phosphoribosyl-dephospho-CoA transferase
AMODNKIM_01636	CDS	1664187	1665125	939	+	fabD_2	2.3.1.39	COG0331	Malonyl CoA-acyl carrier protein transacylase
AMODNKIM_01637	CDS	1665174	1665593	420	+				hypothetical protein
AMODNKIM_01638	CDS	1665586	1666350	765	+				hypothetical protein
AMODNKIM_01639	CDS	1666400	1667317	918	-	cynR_2			HTH-type transcriptional regulator CynR
AMODNKIM_01640	CDS	1667415	1668833	1419	-	norG_1		COG1167	HTH-type transcriptional regulator NorG
AMODNKIM_01641	CDS	1668932	1669066	135	-				hypothetical protein
AMODNKIM_01642	CDS	1669081	1670085	1005	-	cydB_1	7.1.1.7	COG1294	Cytochrome bd-I ubiquinol oxidase subunit 2
AMODNKIM_01643	CDS	1670078	1671523	1446	-				hypothetical protein
AMODNKIM_01644	CDS	1672177	1672995	819	+				hypothetical protein
AMODNKIM_01645	CDS	1673114	1674409	1296	+	sfnC_3	1.14.14.-		putative FMNH2-dependent monooxygenase SfnC
AMODNKIM_01646	CDS	1674587	1675978	1392	+	dmoA_1	1.14.13.131		Dimethyl-sulfide monooxygenase
AMODNKIM_01647	CDS	1676174	1677640	1467	+	nanT_1			Sialic acid transporter NanT
AMODNKIM_01648	CDS	1677702	1678439	738	-				hypothetical protein
AMODNKIM_01649	CDS	1678461	1678886	426	-				hypothetical protein
AMODNKIM_01650	CDS	1679346	1680368	1023	+	tauA		COG4521	Taurine-binding periplasmic protein
AMODNKIM_01651	CDS	1680378	1681172	795	+	tauB_1	7.6.2.7	COG4525	Taurine import ATP-binding protein TauB
AMODNKIM_01652	CDS	1681169	1682038	870	+	ssuC_2		COG0600	Putative aliphatic sulfonates transport permease protein SsuC
AMODNKIM_01653	CDS	1682047	1682928	882	+	tauD	1.14.11.17	COG2175	Alpha-ketoglutarate-dependent taurine dioxygenase
AMODNKIM_01654	CDS	1682996	1683730	735	-	hyuE	5.1.99.5		Hydantoin racemase
AMODNKIM_01655	CDS	1683727	1685196	1470	-	pucI		COG1953	putative allantoin permease
AMODNKIM_01656	CDS	1685607	1686344	738	+	nanR_1			HTH-type transcriptional repressor NanR
AMODNKIM_01657	CDS	1686384	1687274	891	-	dmlR_6			HTH-type transcriptional regulator DmlR
AMODNKIM_01658	CDS	1687470	1688156	687	+	ycaC_1	4.-.-.-	COG1335	putative hydrolase YcaC
AMODNKIM_01659	CDS	1688267	1690141	1875	+	nfdA	3.5.1.91		N-substituted formamide deformylase
AMODNKIM_01660	CDS	1690199	1690360	162	+				hypothetical protein
AMODNKIM_01661	CDS	1690429	1690857	429	-	arsC	1.20.4.1		Arsenate reductase
AMODNKIM_01662	CDS	1690942	1691271	330	+				hypothetical protein
AMODNKIM_01663	CDS	1691376	1692410	1035	+	acr3		COG0798	Arsenical-resistance protein Acr3
AMODNKIM_01664	CDS	1692501	1693403	903	-	benM_3			HTH-type transcriptional regulator BenM
AMODNKIM_01665	CDS	1693505	1694065	561	+				hypothetical protein
AMODNKIM_01666	CDS	1694065	1694586	522	+				hypothetical protein
AMODNKIM_01667	CDS	1694764	1696329	1566	+	ahpF_2	1.8.1.-	COG3634	Alkyl hydroperoxide reductase subunit F
AMODNKIM_01668	CDS	1696383	1698389	2007	-				hypothetical protein
AMODNKIM_01669	CDS	1698506	1699447	942	-				hypothetical protein
AMODNKIM_01670	CDS	1699551	1700366	816	-	cysE	2.3.1.30	COG1045	Serine acetyltransferase
AMODNKIM_01671	CDS	1700359	1701198	840	-	trmJ	2.1.1.-		tRNA (cytidine/uridine/adenosine-2'-O-)-methyltransferase TrmJ
AMODNKIM_01672	CDS	1701213	1704776	3564	-	dnaE	2.7.7.7	COG0587	DNA polymerase III subunit alpha
AMODNKIM_01673	CDS	1704991	1706058	1068	-	ansB	3.5.1.38		Glutaminase-asparaginase
AMODNKIM_01674	CDS	1706742	1708049	1308	-	gltT			Proton/sodium-glutamate symport protein
AMODNKIM_01675	CDS	1708516	1709946	1431	-	alaA	2.6.1.2	COG0436	Glutamate-pyruvate aminotransferase AlaA
AMODNKIM_01676	CDS	1710187	1710606	420	+	msrB	1.8.4.12		Peptide methionine sulfoxide reductase MsrB
AMODNKIM_01677	CDS	1710603	1711088	486	+	gpx1	1.11.1.22		Hydroperoxy fatty acid reductase gpx1
AMODNKIM_01678	CDS	1711088	1711933	846	+	rhaS_2			HTH-type transcriptional activator RhaS
AMODNKIM_01679	CDS	1711998	1712630	633	+				hypothetical protein
AMODNKIM_01680	CDS	1712688	1713914	1227	-	dapL	2.6.1.83	COG0436	LL-diaminopimelate aminotransferase
AMODNKIM_01681	CDS	1713883	1716546	2664	-	glnD		COG2844	Bifunctional uridylyltransferase/uridylyl-removing enzyme
AMODNKIM_01682	CDS	1716574	1717782	1209	-	purT	2.1.2.-	COG0027	Formate-dependent phosphoribosylglycinamide formyltransferase
AMODNKIM_01683	CDS	1717894	1718283	390	-				putative protein.1
AMODNKIM_01684	CDS	1718412	1718753	342	-				hypothetical protein
AMODNKIM_01685	CDS	1718755	1719495	741	-	ygaZ		COG1296	Inner membrane protein YgaZ
AMODNKIM_01686	CDS	1719597	1720067	471	+				hypothetical protein
AMODNKIM_01687	CDS	1720140	1720475	336	-				hypothetical protein
AMODNKIM_01688	CDS	1720648	1721355	708	-	cmr		COG0664	HTH-type transcriptional regulator Cmr
AMODNKIM_01689	CDS	1721448	1721969	522	+				hypothetical protein
AMODNKIM_01690	CDS	1722014	1723105	1092	-	ychF		COG0012	Ribosome-binding ATPase YchF
AMODNKIM_01691	CDS	1723199	1723858	660	-	metI		COG2011	D-methionine transport system permease protein MetI
AMODNKIM_01692	CDS	1723839	1724909	1071	-	metN_1	3.6.3.-	COG1135	Methionine import ATP-binding protein MetN
AMODNKIM_01693	CDS	1724921	1725754	834	-	metQ_1		COG1464	D-methionine-binding lipoprotein MetQ
AMODNKIM_01694	CDS	1725768	1726598	831	-				hypothetical protein
AMODNKIM_01695	CDS	1726613	1728025	1413	-	dmoA_2	1.14.13.131		Dimethyl-sulfide monooxygenase
AMODNKIM_01696	CDS	1728025	1729248	1224	-	soxC_1			Dibenzothiophene desulfurization enzyme C
AMODNKIM_01697	CDS	1729261	1730472	1212	-	soxC_2			Dibenzothiophene desulfurization enzyme C
AMODNKIM_01698	CDS	1730842	1731606	765	+				hypothetical protein
AMODNKIM_01699	CDS	1732144	1733037	894	+	gltI		COG0834	Glutamate/aspartate import solute-binding protein
AMODNKIM_01700	CDS	1733132	1733974	843	+	gltJ		COG0765	Glutamate/aspartate import permease protein GltJ
AMODNKIM_01701	CDS	1733977	1734654	678	+	gltK		COG0765	Glutamate/aspartate import permease protein GltK
AMODNKIM_01702	CDS	1734668	1735411	744	+	glnQ_2			Glutamine transport ATP-binding protein GlnQ
AMODNKIM_01703	CDS	1735463	1736794	1332	-				hypothetical protein
AMODNKIM_01704	CDS	1737125	1737595	471	+	decR_1		COG1522	DNA-binding transcriptional activator DecR
AMODNKIM_01705	CDS	1737626	1738375	750	-	yebC		COG0217	putative transcriptional regulatory protein YebC
AMODNKIM_01706	CDS	1738538	1739083	546	-				hypothetical protein
AMODNKIM_01707	CDS	1739269	1739829	561	-	betI_7			HTH-type transcriptional regulator BetI
AMODNKIM_01708	CDS	1740104	1740967	864	+				hypothetical protein
AMODNKIM_01709	tRNA	1741165	1741241	77	-				tRNA-Met(cat)
AMODNKIM_01710	CDS	1741399	1742631	1233	+				hypothetical protein
AMODNKIM_01711	CDS	1743087	1743185	99	+				hypothetical protein
AMODNKIM_01712	CDS	1743216	1744115	900	-	allS			HTH-type transcriptional activator AllS
AMODNKIM_01713	CDS	1744205	1744642	438	+				hypothetical protein
AMODNKIM_01714	CDS	1744700	1746115	1416	-				hypothetical protein
AMODNKIM_01715	CDS	1746331	1746867	537	-			COG3385	IS4 family transposase ISAba33
AMODNKIM_01716	CDS	1746864	1747424	561	-			COG3385	IS4 family transposase ISAba33
AMODNKIM_01717	CDS	1747557	1748021	465	-				hypothetical protein
AMODNKIM_01718	CDS	1748134	1749063	930	-	yijE			putative cystine transporter YijE
AMODNKIM_01719	CDS	1749158	1750009	852	+	hdfR_3			HTH-type transcriptional regulator HdfR
AMODNKIM_01720	CDS	1750049	1750228	180	-				hypothetical protein
AMODNKIM_01721	CDS	1750805	1751824	1020	-	mrkD_1			Fimbria adhesin protein
AMODNKIM_01722	CDS	1751821	1754358	2538	-	htrE_1		COG3188	Outer membrane usher protein HtrE
AMODNKIM_01723	CDS	1754410	1755150	741	-	yadV_1			putative fimbrial chaperone YadV
AMODNKIM_01724	CDS	1755221	1755757	537	-	smf-1_1		COG3539	Major fimbrial subunit SMF-1
AMODNKIM_01725	CDS	1756203	1756553	351	+				hypothetical protein
AMODNKIM_01726	CDS	1756617	1756829	213	+				hypothetical protein
AMODNKIM_01727	CDS	1756876	1757865	990	-	bioB	2.8.1.6	COG0502	Biotin synthase
AMODNKIM_01728	CDS	1757965	1759053	1089	-	queG	1.17.99.6		Epoxyqueuosine reductase
AMODNKIM_01729	CDS	1759082	1760542	1461	+	nnr		COG0062	Bifunctional NAD(P)H-hydrate repair enzyme Nnr
AMODNKIM_01730	CDS	1760554	1761099	546	-	ruvC	3.1.22.4	COG0817	Crossover junction endodeoxyribonuclease RuvC
AMODNKIM_01731	CDS	1761329	1761922	594	+	sutR_1		COG1396	HTH-type transcriptional regulator SutR
AMODNKIM_01732	CDS	1761919	1762464	546	+		2.3.1.-		L-methionine sulfoximine/L-methionine sulfone acetyltransferase
AMODNKIM_01733	CDS	1762533	1763357	825	-		3.5.2.6	COG2602	Beta-lactamase OXA-133
AMODNKIM_01734	CDS	1763756	1764316	561	+				hypothetical protein
AMODNKIM_01735	CDS	1764380	1764565	186	-				hypothetical protein
AMODNKIM_01736	CDS	1764824	1765072	249	+				hypothetical protein
AMODNKIM_01737	CDS	1765196	1766362	1167	-	metK	2.5.1.6	COG0192	S-adenosylmethionine synthase
AMODNKIM_01738	CDS	1766886	1768874	1989	+	tktA	2.2.1.1	COG0021	Transketolase 1
AMODNKIM_01739	CDS	1768929	1769336	408	-				hypothetical protein
AMODNKIM_01740	CDS	1769551	1770141	591	+	yceI		COG2353	Protein YceI
AMODNKIM_01741	CDS	1770187	1770777	591	-				hypothetical protein
AMODNKIM_01742	CDS	1770963	1771709	747	+				hypothetical protein
AMODNKIM_01743	CDS	1771745	1771975	231	-				hypothetical protein
AMODNKIM_01744	CDS	1772224	1773309	1086	-	trmA	2.1.1.-	COG2265	tRNA/tmRNA (uracil-C(5))-methyltransferase
AMODNKIM_01745	CDS	1773413	1773886	474	-				hypothetical protein
AMODNKIM_01746	CDS	1773992	1777744	3753	-	putA		COG0506	Bifunctional protein PutA
AMODNKIM_01747	CDS	1777869	1778357	489	+	lrp_4		COG1522	Leucine-responsive regulatory protein
AMODNKIM_01748	CDS	1778390	1779880	1491	-	putP		COG0591	Sodium/proline symporter
AMODNKIM_01749	CDS	1780288	1780986	699	-	cobB	2.3.1.286	COG0846	NAD-dependent protein deacylase
AMODNKIM_01750	CDS	1781089	1781463	375	-	gcvH		COG0509	Glycine cleavage system H protein
AMODNKIM_01751	CDS	1781502	1782527	1026	-				putative HTH-type transcriptional regulator
AMODNKIM_01752	CDS	1782636	1783076	441	-				hypothetical protein
AMODNKIM_01753	CDS	1783076	1784923	1848	-		3.6.3.-	COG1132	Putative multidrug export ATP-binding/permease protein
AMODNKIM_01754	CDS	1785298	1785834	537	-				hypothetical protein
AMODNKIM_01755	CDS	1785838	1786518	681	-				hypothetical protein
AMODNKIM_01756	CDS	1786524	1787726	1203	-	sstT		COG3633	Serine/threonine transporter SstT
AMODNKIM_01757	CDS	1788062	1788631	570	+			COG3385	IS4 family transposase ISAba33
AMODNKIM_01758	CDS	1788718	1789152	435	+			COG3385	IS4 family transposase ISAba1
AMODNKIM_01759	CDS	1789339	1789647	309	-	bigR		COG0640	Biofilm growth-associated repressor
AMODNKIM_01760	CDS	1790121	1790687	567	-	yxaF			putative HTH-type transcriptional regulator YxaF
AMODNKIM_01761	CDS	1791025	1792188	1164	-		1.14.11.-	COG2850	putative ribosomal oxygenase
AMODNKIM_01762	CDS	1792219	1792812	594	-	yceF	3.6.1.-	COG0424	7-methyl-GTP pyrophosphatase
AMODNKIM_01763	CDS	1792812	1793195	384	-				hypothetical protein
AMODNKIM_01764	CDS	1793334	1794521	1188	+	pgk	2.7.2.3	COG0126	Phosphoglycerate kinase
AMODNKIM_01765	CDS	1794646	1794888	243	+				hypothetical protein
AMODNKIM_01766	CDS	1795010	1796047	1038	+	cbbA	4.1.2.13		Fructose-bisphosphate aldolase
AMODNKIM_01767	CDS	1796166	1797476	1311	-	surA	5.2.1.8	COG0760	Chaperone SurA
AMODNKIM_01768	CDS	1797476	1799917	2442	-	lptD		COG1452	LPS-assembly protein LptD
AMODNKIM_01769	CDS	1800038	1801051	1014	+	amgK	2.7.1.221	COG3178	N-acetylmuramate/N-acetylglucosamine kinase
AMODNKIM_01770	CDS	1801051	1801740	690	+	murU	2.7.7.99	COG1208	N-acetylmuramate alpha-1-phosphate uridylyltransferase
AMODNKIM_01771	CDS	1801828	1802460	633	+	rsmG	2.1.1.170	COG0357	Ribosomal RNA small subunit methyltransferase G
AMODNKIM_01772	CDS	1802482	1803264	783	+	soj	3.6.-.-	COG1192	Sporulation initiation inhibitor protein Soj
AMODNKIM_01773	CDS	1803261	1804148	888	+	parB		COG1475	putative chromosome-partitioning protein ParB
AMODNKIM_01774	CDS	1804198	1804833	636	+	tolQ_2			Tol-Pal system protein TolQ
AMODNKIM_01775	CDS	1804849	1805277	429	+	tolR			Tol-Pal system protein TolR
AMODNKIM_01776	CDS	1805274	1807001	1728	+	msbA	7.5.2.6	COG1132	Lipid A export ATP-binding/permease protein MsbA
AMODNKIM_01777	CDS	1807004	1808014	1011	+	lpxK	2.7.1.130	COG1663	Tetraacyldisaccharide 4'-kinase
AMODNKIM_01778	CDS	1808024	1808785	762	+	kdsB	2.7.7.38		3-deoxy-manno-octulosonate cytidylyltransferase
AMODNKIM_01779	CDS	1808797	1809777	981	+				hypothetical protein
AMODNKIM_01780	CDS	1809789	1810130	342	+				hypothetical protein
AMODNKIM_01781	CDS	1810148	1810921	774	+	ycfH	3.1.-.-	COG0084	putative metal-dependent hydrolase YcfH
AMODNKIM_01782	CDS	1810959	1811567	609	+				hypothetical protein
AMODNKIM_01783	CDS	1811577	1812131	555	+				hypothetical protein
AMODNKIM_01784	CDS	1812121	1812501	381	+				hypothetical protein
AMODNKIM_01785	CDS	1812501	1813202	702	+				hypothetical protein
AMODNKIM_01786	CDS	1813202	1814161	960	+	xcpX		COG3156	Type II secretion system protein K
AMODNKIM_01787	CDS	1814392	1814988	597	+				hypothetical protein
AMODNKIM_01788	CDS	1815039	1815752	714	+	ung	3.2.2.27	COG0692	Uracil-DNA glycosylase
AMODNKIM_01789	CDS	1815752	1816873	1122	+	caiD	4.2.1.149		Carnitinyl-CoA dehydratase
AMODNKIM_01790	CDS	1816907	1817383	477	+	tadA	3.5.4.33	COG0590	tRNA-specific adenosine deaminase
AMODNKIM_01791	CDS	1817453	1817896	444	+				hypothetical protein
AMODNKIM_01792	CDS	1817904	1818590	687	+	cmk	2.7.4.25	COG0283	Cytidylate kinase
AMODNKIM_01793	CDS	1818695	1820368	1674	+	rpsA		COG0539	30S ribosomal protein S1
AMODNKIM_01794	CDS	1820525	1820827	303	+	ihfB		COG0776	Integration host factor subunit beta
AMODNKIM_01795	CDS	1820852	1821217	366	+	lapA			Lipopolysaccharide assembly protein A
AMODNKIM_01796	CDS	1821383	1822081	699	+	pyrF	4.1.1.23	COG0284	Orotidine 5'-phosphate decarboxylase
AMODNKIM_01797	CDS	1822078	1822989	912	-				hypothetical protein
AMODNKIM_01798	CDS	1823039	1824547	1509	-		1.14.13.-	COG2072	Baeyer-Villiger monooxygenase
AMODNKIM_01799	CDS	1824708	1825727	1020	+				putative HTH-type transcriptional regulator
AMODNKIM_01800	CDS	1825811	1826953	1143	+	zapE		COG1485	Cell division protein ZapE
AMODNKIM_01801	CDS	1827323	1829488	2166	+	glcB	2.3.3.9	COG2225	Malate synthase G
AMODNKIM_01802	CDS	1829591	1830040	450	+	bltD	2.3.1.57	COG0454	Spermine/spermidine acetyltransferase
AMODNKIM_01803	CDS	1830107	1830520	414	-	exbD_2		COG0848	Biopolymer transport protein ExbD
AMODNKIM_01804	CDS	1830540	1830962	423	-	exbD_3		COG0848	Biopolymer transport protein ExbD
AMODNKIM_01805	CDS	1830978	1831856	879	-	tolQ_3			Tol-Pal system protein TolQ
AMODNKIM_01806	CDS	1831900	1832616	717	-				hypothetical protein
AMODNKIM_01807	CDS	1832726	1835395	2670	-	btuB_2			Vitamin B12 transporter BtuB
AMODNKIM_01808	CDS	1835540	1835632	93	-				hypothetical protein
AMODNKIM_01809	CDS	1836177	1837961	1785	+	hbpA		COG0747	Heme-binding protein A
AMODNKIM_01810	CDS	1837980	1839800	1821	+	oppA_2		COG4166	Oligopeptide-binding protein OppA
AMODNKIM_01811	CDS	1839822	1841834	2013	+	prlC_1	3.4.24.70	COG0339	Oligopeptidase A
AMODNKIM_01812	CDS	1841847	1842785	939	+	gsiC		COG0601	Glutathione transport system permease protein GsiC
AMODNKIM_01813	CDS	1842793	1843935	1143	+				hypothetical protein
AMODNKIM_01814	CDS	1843948	1845678	1731	+	gsiA	7.4.2.10	COG1123	Glutathione import ATP-binding protein GsiA
AMODNKIM_01815	CDS	1845711	1846445	735	+				hypothetical protein
AMODNKIM_01816	CDS	1846499	1846867	369	-				hypothetical protein
AMODNKIM_01817	CDS	1847177	1848034	858	+	cysQ	3.1.3.7	COG1218	3'(2'),5'-bisphosphate nucleotidase CysQ
AMODNKIM_01818	CDS	1848092	1848826	735	+				hypothetical protein
AMODNKIM_01819	CDS	1848883	1849149	267	-	rpsT		COG0268	30S ribosomal protein S20
AMODNKIM_01820	CDS	1849362	1850027	666	+				hypothetical protein
AMODNKIM_01821	CDS	1850040	1850546	507	+		4.1.3.17	COG0684	Putative 4-hydroxy-4-methyl-2-oxoglutarate aldolase
AMODNKIM_01822	CDS	1850570	1851349	780	+				hypothetical protein
AMODNKIM_01823	CDS	1851494	1852435	942	+	yfeX_2	1.11.1.-	COG2837	Dye-decolorizing peroxidase YfeX
AMODNKIM_01824	CDS	1852516	1852872	357	+				hypothetical protein
AMODNKIM_01825	CDS	1853007	1856468	3462	+	mfd	3.6.4.-	COG1197	Transcription-repair-coupling factor
AMODNKIM_01826	CDS	1856669	1857103	435	+				hypothetical protein
AMODNKIM_01827	CDS	1857156	1858625	1470	+				hypothetical protein
AMODNKIM_01828	CDS	1858672	1859010	339	-	fdx_2		COG0633	2Fe-2S ferredoxin
AMODNKIM_01829	CDS	1859029	1860888	1860	-	hscA		COG0443	Chaperone protein HscA
AMODNKIM_01830	CDS	1860927	1861445	519	-	hscB		COG1076	Co-chaperone protein HscB
AMODNKIM_01831	CDS	1861531	1861851	321	-	iscA		COG0316	Iron-binding protein IscA
AMODNKIM_01832	CDS	1861882	1862268	387	-	iscU		COG0822	Iron-sulfur cluster assembly scaffold protein IscU
AMODNKIM_01833	CDS	1862335	1863552	1218	-	iscS	2.8.1.7	COG1104	Cysteine desulfurase IscS
AMODNKIM_01834	CDS	1863554	1864027	474	-	iscR_1		COG1959	HTH-type transcriptional regulator IscR
AMODNKIM_01835	CDS	1864138	1864785	648	-				hypothetical protein
AMODNKIM_01836	CDS	1864996	1865451	456	+				hypothetical protein
AMODNKIM_01837	CDS	1865621	1865893	273	+	hupB		COG0776	DNA-binding protein HU-beta
AMODNKIM_01838	CDS	1866025	1867890	1866	+	ppiD	5.2.1.8	COG0760	Peptidyl-prolyl cis-trans isomerase D
AMODNKIM_01839	CDS	1867930	1868895	966	-			COG3039	IS5 family transposase IS4811
AMODNKIM_01840	CDS	1869067	1870290	1224	+	alkB	1.14.15.3		Alkane 1-monooxygenase
AMODNKIM_01841	CDS	1870410	1871615	1206	-	caiA	1.3.8.13		Crotonobetainyl-CoA reductase
AMODNKIM_01842	CDS	1871637	1872929	1293	-	acdA	1.3.99.-	COG1960	Acyl-CoA dehydrogenase
AMODNKIM_01843	CDS	1873150	1874523	1374	-	ubiB_3	2.7.-.-		protein kinase UbiB
AMODNKIM_01844	CDS	1874760	1875062	303	-				hypothetical protein
AMODNKIM_01845	CDS	1875253	1875717	465	+	ybaK	4.2.-.-	COG2606	Cys-tRNA(Pro)/Cys-tRNA(Cys) deacylase YbaK
AMODNKIM_01846	CDS	1876090	1877874	1785	+	iucA	6.3.2.38	COG4264	N(2)-citryl-N(6)-acetyl-N(6)-hydroxylysine synthase
AMODNKIM_01847	CDS	1877867	1879300	1434	+	iucD_1	1.14.13.59	COG3486	L-lysine N6-monooxygenase
AMODNKIM_01848	CDS	1879321	1880760	1440	+	farB			Fatty acid resistance protein FarB
AMODNKIM_01849	CDS	1880772	1882613	1842	+	sbnF	6.3.2.55	COG4264	2-[(L-alanin-3-ylcarbamoyl)methyl]-3-(2-aminoethylcarbamoyl)-2-hydroxypropanoate synthase
AMODNKIM_01850	CDS	1882623	1884533	1911	+				hypothetical protein
AMODNKIM_01851	CDS	1884546	1885316	771	+				hypothetical protein
AMODNKIM_01852	CDS	1885303	1885920	618	+				hypothetical protein
AMODNKIM_01853	CDS	1886015	1888324	2310	+	iutA_1			Ferric aerobactin receptor
AMODNKIM_01854	CDS	1888409	1888702	294	+				hypothetical protein
AMODNKIM_01855	CDS	1888703	1890226	1524	+				hypothetical protein
AMODNKIM_01856	CDS	1890223	1890561	339	+				hypothetical protein
AMODNKIM_01857	CDS	1890696	1891316	621	+				hypothetical protein
AMODNKIM_01858	CDS	1891648	1893795	2148	+	mtlD	1.1.1.17		Mannitol-1-phosphate 5-dehydrogenase
AMODNKIM_01859	CDS	1893900	1894526	627	+				hypothetical protein
AMODNKIM_01860	CDS	1894514	1895032	519	+	cobP	2.7.1.156		Bifunctional adenosylcobalamin biosynthesis protein CobP
AMODNKIM_01861	CDS	1895035	1896090	1056	+	cobT	2.4.2.21		Nicotinate-nucleotide--dimethylbenzimidazole phosphoribosyltransferase
AMODNKIM_01862	CDS	1896104	1896682	579	+	pspB	3.1.3.3	COG0406	Putative phosphoserine phosphatase 2
AMODNKIM_01863	CDS	1896807	1898375	1569	+				hypothetical protein
AMODNKIM_01864	CDS	1898482	1899225	744	+	cobS	2.7.8.26	COG0368	Adenosylcobinamide-GDP ribazoletransferase
AMODNKIM_01865	CDS	1899301	1900443	1143	-	aroF_1	2.5.1.54	COG0722	Phospho-2-dehydro-3-deoxyheptonate aldolase, Tyr-sensitive
AMODNKIM_01866	CDS	1900507	1901391	885	-				hypothetical protein
AMODNKIM_01867	CDS	1901524	1901826	303	-				hypothetical protein
AMODNKIM_01868	CDS	1901823	1903379	1557	-				hypothetical protein
AMODNKIM_01869	CDS	1903372	1903647	276	-				hypothetical protein
AMODNKIM_01870	CDS	1903734	1905869	2136	-	fhuE_1		COG4773	FhuE receptor
AMODNKIM_01871	CDS	1906091	1907266	1176	+	lpxB	2.4.1.182	COG0763	Lipid-A-disaccharide synthase
AMODNKIM_01872	CDS	1907263	1907910	648	-				hypothetical protein
AMODNKIM_01873	CDS	1908029	1909051	1023	+				hypothetical protein
AMODNKIM_01874	CDS	1909044	1910801	1758	+	ybhF		COG1131	putative multidrug ABC transporter ATP-binding protein YbhF
AMODNKIM_01875	CDS	1910812	1911936	1125	+	ybhS		COG0842	putative multidrug ABC transporter permease YbhS
AMODNKIM_01876	CDS	1911941	1913059	1119	+	ybhR_1		COG0842	putative multidrug ABC transporter permease YbhR
AMODNKIM_01877	CDS	1913108	1913977	870	-				hypothetical protein
AMODNKIM_01878	CDS	1914017	1914478	462	+				hypothetical protein
AMODNKIM_01879	CDS	1914578	1915168	591	+				hypothetical protein
AMODNKIM_01880	CDS	1915272	1916378	1107	-				hypothetical protein
AMODNKIM_01881	CDS	1916633	1917046	414	-				hypothetical protein
AMODNKIM_01882	CDS	1917065	1917334	270	-				hypothetical protein
AMODNKIM_01883	CDS	1917599	1918024	426	+				hypothetical protein
AMODNKIM_01884	CDS	1918155	1918355	201	+				hypothetical protein
AMODNKIM_01885	CDS	1918854	1919078	225	+				hypothetical protein
AMODNKIM_01886	CDS	1919257	1919631	375	+				hypothetical protein
AMODNKIM_01887	CDS	1919806	1920573	768	+	ycgJ	2.1.1.-		putative methyltransferase YcgJ
AMODNKIM_01888	CDS	1920654	1921739	1086	-	phaC_1	2.3.1.-	COG3243	Poly(3-hydroxyalkanoate) polymerase subunit PhaC
AMODNKIM_01889	CDS	1921873	1923060	1188	+	metZ	2.5.1.-	COG0626	O-succinylhomoserine sulfhydrylase
AMODNKIM_01890	CDS	1923239	1923775	537	-			COG3385	IS4 family transposase ISAba33
AMODNKIM_01891	CDS	1923772	1924332	561	-			COG3385	IS4 family transposase ISAba33
AMODNKIM_01892	CDS	1924427	1924663	237	+				hypothetical protein
AMODNKIM_01893	CDS	1924929	1925258	330	+	ybaB		COG0718	Nucleoid-associated protein YbaB
AMODNKIM_01894	CDS	1925268	1925864	597	+	recR		COG0353	Recombination protein RecR
AMODNKIM_01895	CDS	1926170	1927294	1125	+	rnd_1	3.1.13.5	COG0349	Ribonuclease D
AMODNKIM_01896	CDS	1927797	1928063	267	+				hypothetical protein
AMODNKIM_01897	CDS	1928194	1928535	342	+				hypothetical protein
AMODNKIM_01898	CDS	1928608	1928772	165	-				hypothetical protein
AMODNKIM_01899	CDS	1929215	1929520	306	+	ycgL		COG3100	Protein YcgL
AMODNKIM_01900	CDS	1929510	1929899	390	+				hypothetical protein
AMODNKIM_01901	CDS	1929929	1930780	852	+				hypothetical protein
AMODNKIM_01902	CDS	1930796	1931983	1188	+				hypothetical protein
AMODNKIM_01903	CDS	1932020	1933225	1206	+	trpB_1	4.2.1.20	COG0133	Tryptophan synthase beta chain
AMODNKIM_01904	CDS	1933462	1934466	1005	+	prmB	2.1.1.298	COG2890	50S ribosomal protein L3 glutamine methyltransferase
AMODNKIM_01905	CDS	1934479	1935570	1092	+	aroC	4.2.3.5		Chorismate synthase
AMODNKIM_01906	CDS	1935667	1936896	1230	-				hypothetical protein
AMODNKIM_01907	CDS	1937217	1937969	753	+				hypothetical protein
AMODNKIM_01908	CDS	1938016	1939155	1140	-				hypothetical protein
AMODNKIM_01909	CDS	1939313	1940299	987	-	lipA_1	2.8.1.8	COG0320	Lipoyl synthase
AMODNKIM_01910	CDS	1940664	1941626	963	+	acoA	1.1.1.-	COG1071	Acetoin:2,6-dichlorophenolindophenol oxidoreductase subunit alpha
AMODNKIM_01911	CDS	1941640	1942659	1020	+	acoB	1.1.1.-	COG0022	Acetoin:2,6-dichlorophenolindophenol oxidoreductase subunit beta
AMODNKIM_01912	CDS	1942661	1944196	1536	+	pdhC	2.3.1.12		Dihydrolipoyllysine-residue acetyltransferase component of pyruvate dehydrogenase complex
AMODNKIM_01913	CDS	1944207	1945610	1404	+		1.8.1.4	COG1249	Dihydrolipoyl dehydrogenase
AMODNKIM_01914	CDS	1945637	1946422	786	+	budC	1.1.1.304		Diacetyl reductase [(S)-acetoin forming]
AMODNKIM_01915	CDS	1946452	1947510	1059	+	gutB	1.1.1.-	COG1063	Sorbitol dehydrogenase
AMODNKIM_01916	CDS	1947558	1948469	912	-				hypothetical protein
AMODNKIM_01917	CDS	1948539	1949810	1272	-	norR_1			Anaerobic nitric oxide reductase transcription regulator NorR
AMODNKIM_01918	CDS	1950002	1950697	696	+	blh_1	3.-.-.-	COG0491	Beta-lactamase hydrolase-like protein
AMODNKIM_01919	CDS	1950707	1952362	1656	+				hypothetical protein
AMODNKIM_01920	CDS	1952634	1953425	792	+				hypothetical protein
AMODNKIM_01921	CDS	1953535	1954539	1005	+				hypothetical protein
AMODNKIM_01922	CDS	1954572	1955489	918	-				hypothetical protein
AMODNKIM_01923	CDS	1955656	1956510	855	+	rhaS_3			HTH-type transcriptional activator RhaS
AMODNKIM_01924	CDS	1956507	1956902	396	-	hxlR_1		COG1733	HTH-type transcriptional activator HxlR
AMODNKIM_01925	CDS	1956998	1957606	609	+	azoR1	1.7.1.17	COG1182	FMN-dependent NADH-azoreductase 1
AMODNKIM_01926	CDS	1957690	1959039	1350	-				hypothetical protein
AMODNKIM_01927	CDS	1959281	1960024	744	+	nagR_1		COG2188	HTH-type transcriptional repressor NagR
AMODNKIM_01928	CDS	1960053	1961786	1734	+	aprA	1.8.99.2		Adenylylsulfate reductase subunit alpha
AMODNKIM_01929	CDS	1961807	1962052	246	+	ndhI	7.1.1.-		NAD(P)H-quinone oxidoreductase subunit I, chloroplastic
AMODNKIM_01930	CDS	1962072	1963502	1431	+				hypothetical protein
AMODNKIM_01931	CDS	1963537	1964391	855	+				hypothetical protein
AMODNKIM_01932	CDS	1964393	1965232	840	+	tauB_2	7.6.2.7	COG4525	Taurine import ATP-binding protein TauB
AMODNKIM_01933	CDS	1965229	1965426	198	+				hypothetical protein
AMODNKIM_01934	CDS	1965417	1966625	1209	-				IS256 family transposase ISAba26
AMODNKIM_01935	CDS	1966785	1967552	768	+				hypothetical protein
AMODNKIM_01936	CDS	1967536	1967817	282	+				hypothetical protein
AMODNKIM_01937	CDS	1967857	1969143	1287	-	kgtP_1			Alpha-ketoglutarate permease
AMODNKIM_01938	CDS	1969689	1971866	2178	+	fatA_1			Ferric-anguibactin receptor FatA
AMODNKIM_01939	CDS	1971924	1973342	1419	-	aspA	4.3.1.1	COG1027	Aspartate ammonia-lyase
AMODNKIM_01940	CDS	1973756	1973941	186	+				hypothetical protein
AMODNKIM_01941	CDS	1974027	1974254	228	+				hypothetical protein
AMODNKIM_01942	CDS	1975032	1975928	897	+	yjiE			HTH-type transcriptional regulator YjiE
AMODNKIM_01943	CDS	1976166	1977062	897	+	pcpR			PCP degradation transcriptional activation protein
AMODNKIM_01944	CDS	1977122	1978294	1173	-	thlA_1	2.3.1.9	COG0183	Acetyl-CoA acetyltransferase
AMODNKIM_01945	CDS	1978360	1979769	1410	-	atoE		COG2031	Putative short-chain fatty acid transporter
AMODNKIM_01946	CDS	1979886	1980527	642	-	scoB	2.8.3.5	COG2057	putative succinyl-CoA:3-ketoacid coenzyme A transferase subunit B
AMODNKIM_01947	CDS	1980529	1981233	705	-	scoA	2.8.3.5	COG1788	putative succinyl-CoA:3-ketoacid coenzyme A transferase subunit A
AMODNKIM_01948	CDS	1981479	1982360	882	-	gltC_3			HTH-type transcriptional regulator GltC
AMODNKIM_01949	CDS	1982641	1983099	459	+				hypothetical protein
AMODNKIM_01950	CDS	1983508	1984929	1422	+				hypothetical protein
AMODNKIM_01951	CDS	1984963	1985748	786	+	bdhA	1.1.1.30		D-beta-hydroxybutyrate dehydrogenase
AMODNKIM_01952	CDS	1985779	1986213	435	-			COG3385	IS4 family transposase ISAba1
AMODNKIM_01953	CDS	1986300	1986869	570	-			COG3385	IS4 family transposase ISAba33
AMODNKIM_01954	CDS	1987261	1988247	987	+	rhaS_4			HTH-type transcriptional activator RhaS
AMODNKIM_01955	CDS	1988316	1988726	411	-	mhbT			3-hydroxybenzoate transporter MhbT
AMODNKIM_01956	CDS	1988784	1989659	876	-	pcaK_3		COG0477	4-hydroxybenzoate transporter PcaK
AMODNKIM_01957	CDS	1989989	1991239	1251	+				hypothetical protein
AMODNKIM_01958	CDS	1991252	1992037	786	+	bacC_2	1.1.1.385		Dihydroanticapsin 7-dehydrogenase
AMODNKIM_01959	CDS	1992081	1993319	1239	+	styA	1.14.14.11		Styrene monooxygenase StyA
AMODNKIM_01960	CDS	1993348	1993878	531	+	C1-hpah_1	1.5.1.36		p-hydroxyphenylacetate 3-hydroxylase, reductase component
AMODNKIM_01961	CDS	1993932	1994879	948	+				hypothetical protein
AMODNKIM_01962	CDS	1994939	1995997	1059	-	rhaS_5			HTH-type transcriptional activator RhaS
AMODNKIM_01963	CDS	1996435	1997463	1029	-	antC		COG0543	Anthranilate 1,2-dioxygenase electron transfer component
AMODNKIM_01964	CDS	1997475	1997966	492	-	antB	1.14.12.1	COG5517	Anthranilate 1,2-dioxygenase small subunit
AMODNKIM_01965	CDS	1997969	1999384	1416	-	antA_1	1.14.12.1	COG4638	Anthranilate 1,2-dioxygenase large subunit
AMODNKIM_01966	CDS	1999607	1999957	351	+	mopA		COG2005	Molybdenum-pterin-binding protein MopA
AMODNKIM_01967	CDS	2000148	2000933	786	+	modA		COG0725	Molybdate-binding protein ModA
AMODNKIM_01968	CDS	2000930	2001622	693	+	modB		COG4149	Molybdenum transport system permease protein ModB
AMODNKIM_01969	CDS	2001627	2002247	621	+	cysA_1	7.3.2.3	COG1118	Sulfate/thiosulfate import ATP-binding protein CysA
AMODNKIM_01970	CDS	2002607	2003377	771	+	dhbA	1.3.1.28	COG1028	2,3-dihydro-2,3-dihydroxybenzoate dehydrogenase
AMODNKIM_01971	CDS	2003450	2004091	642	+	vibB	3.3.2.1	COG1535	Vibriobactin-specific isochorismatase
AMODNKIM_01972	CDS	2004619	2005020	402	+				hypothetical protein
AMODNKIM_01973	CDS	2005088	2006869	1782	-	yhcR	3.1.31.-	COG0737	Endonuclease YhcR
AMODNKIM_01974	CDS	2007175	2009250	2076	+	ppk_2	2.7.4.1		Polyphosphate kinase
AMODNKIM_01975	CDS	2009624	2010535	912	+	pqqB		COG1235	Coenzyme PQQ synthesis protein B
AMODNKIM_01976	CDS	2010544	2011302	759	+	pqqC	1.3.3.11	COG5424	Pyrroloquinoline-quinone synthase
AMODNKIM_01977	CDS	2011299	2011583	285	+	pqqD			PqqA binding protein
AMODNKIM_01978	CDS	2011580	2012734	1155	+	pqqE	1.21.98.4	COG0535	PqqA peptide cyclase
AMODNKIM_01979	CDS	2012751	2013803	1053	+				hypothetical protein
AMODNKIM_01980	CDS	2014384	2014560	177	+				hypothetical protein
AMODNKIM_01981	CDS	2014814	2015050	237	+				hypothetical protein
AMODNKIM_01982	CDS	2015218	2015805	588	+				hypothetical protein
AMODNKIM_01983	CDS	2015814	2017340	1527	-	clsC_1	2.7.8.-	COG1502	Cardiolipin synthase C
AMODNKIM_01984	CDS	2017806	2018273	468	+				hypothetical protein
AMODNKIM_01985	CDS	2019086	2019451	366	+				hypothetical protein
AMODNKIM_01986	CDS	2019529	2020692	1164	-				hypothetical protein
AMODNKIM_01987	CDS	2020875	2022746	1872	+				hypothetical protein
AMODNKIM_01988	CDS	2022976	2024085	1110	+	frmA	1.1.1.284	COG1062	S-(hydroxymethyl)glutathione dehydrogenase
AMODNKIM_01989	CDS	2024141	2025091	951	-				hypothetical protein
AMODNKIM_01990	CDS	2025205	2026221	1017	-	mrkD_2			Fimbria adhesin protein
AMODNKIM_01991	CDS	2026218	2028776	2559	-	htrE_2		COG3188	Outer membrane usher protein HtrE
AMODNKIM_01992	CDS	2028834	2029580	747	-	yadV_2			putative fimbrial chaperone YadV
AMODNKIM_01993	CDS	2029622	2030191	570	+			COG3385	IS4 family transposase ISAba33
AMODNKIM_01994	CDS	2030278	2030712	435	+			COG3385	IS4 family transposase ISAba1
AMODNKIM_01995	CDS	2030846	2031379	534	-	smf-1_2		COG3539	Major fimbrial subunit SMF-1
AMODNKIM_01996	CDS	2031868	2032158	291	-				hypothetical protein
AMODNKIM_01997	CDS	2033130	2034185	1056	-				hypothetical protein
AMODNKIM_01998	CDS	2034283	2034972	690	-				hypothetical protein
[truncated: 1,839 more rows]

## Sheet: TableS4
A. baumanii presented in the same cluster with the A. baumannii strains AB329
Accession number	Strain	Source	Country	Year of isolation	Genome size	No. CDS	No. tRNAs	%ANI	Platform og WGS	Reference
CP091452	AB329	Sputum	Thailand	2015	3948028	3745	71	100	PacBio/Illimina	This study
JABCNI000000000	AB140	Sputum	Thailand	2013	3990813	3875	73	99.7553	illumina	kongthai 2021	1*
CP017650.1	KAB05	Blood	South Korea	2015	3967717	3798	73	99.6783	PacBio	Unpublished
CP017652.1	KAB06	Wound	South Korea	2015	3967831	3754	73	99.6756	PacBio	Unpublished
CP017644.1	KAB02	Bronchial	South Korea	2015	4004978	3784	72	99.6706	PacBio	Unpublished
CP014541.1	XH856	Drainage fluid	China	2010	3908399	3621	73	99.6173	PacBio	Unpublished
AP024415.1	NIPH17_00019	Blood	Cambodia	2017	4011788	3856	72	99.5088	Nanopore MinION	Hirabayashi et al., 2021	2*
JABCNM000000000	AB53	Sputum	Thailand	2013	4108360	4059	69	99.2366	illumina	kongthai 2021	1*
CP050401.1	VB2181	NA	India	NA	3943808	3703	73		Illumina/Oxford Nanopore	Unpublished
CP007535.2	AC29	EndotrachealSecretion	Malaysia	2011	3851648	3662	62		Illumina	Lean et al., 2016	3*
Reference
1*	https://www.liebertpub.com/doi/10.1089/mdr.2020.0064
2*	https://www.frontiersin.org/articles/10.3389/fmicb.2021.675463/full
3*	https://doi.org/10.3389/fmicb.2015.01445

## Sheet: Table S5
General genome characteristics and meta data of pAB329b-like plasmids
Host strains	Accession no. of host	ST types	Number of plasmids	Name of pAB329b-like plasmids (Accession no.)	Accession no.	Sequencing platform/Assembly Method	Size (kbp)/GC content (%)	%ANI to pAB329b	Year of isolation	Source of isolation	Country isolated	Bertini GR groups	No. of ORFs (re-annotated)	AMR genes
AB329	CP091452	ST98	2	pAB329b	CP091454	PacBio and Illimina/Unicycler	82.1/33.66	1	2015	sputum	Thailand	GR6	114	aph(3')-VIa
AB5075-UW	CP008706	ST1	3	p1AB5075	CP008707	Illumina, PacBio, Sanger/Abys, PCR and Direct	83610/36.97	0.99983	2008	tibia/osteomyelitis	USA	GR6	114	sul1_5, dfrA7_5, aac(6')-Ib_1, blaGES-11_1, aph(6)-Id_1, aph(3'')-Ib_5, aadA2_1, cmlA1_2, ant(2'')-Ia_1, aph(3')-VIa_1
ACICU	CP000863.1	ST2	2	pACICU2	CP000865.1	-	64366/33.4	0.999072	2005	-	Italy	GR6	97	NA
CMC-CR-MDR-Ab4	CP016295	ST2	2	pCMCVTAb2-Ab4	CP016297	PacBio RS II/SMRT	74090/33.66	0.9984	2016	BAL	USA	GR6	103	aph(3')-VIa_1, blaOXA-23_1
ARLG_6344	CP081139	ST2	4	pARLG_6344_1	CP081140	Oxford Nanopore MiniION/Unicycler	73194/33.68	0.9984	2018	Blood	USA	GR6	102	blaOXA-23_1
ABUH763	CP035051	ST2	2	p74.1Kbp	CP035052	Illumina NextSeq and Oxford Nanopore/Unicycler	74091/33.67	0.9984	2005	cerebrospinal fluid	Italy	GR6	103	blaOXA-23_1, aph(3')-VIa_1
ABUH793	CP035045	ST2	3	p74.1Kbp	CP035047	Illumina NextSeq and Oxford Nanopore/Unicycler	74091/33.67	0.9984	2015	NA	NA	GR6	103	blaOXA-23_1, aph(3')-VIa_1
DA33382	CP030106	ST1	3	pDA33382-85	CP030109	PacBio and Illimina/CLC Genomics workbench	84678/33.83	0.998	2018	Tracheal secretion	Germany	GR6	115	aph(3')-VIa_1, blaOXA-164_1
D46	CP048131	ST25	4	pD46-3	CP048134	Illumina; Oxford Nanopore MiniION/Hybrid assembly	74916/33.68	0.998	2010	mid stream urine	Australia	GR6	104	blaOXA-23_1, aph(3')-VIa_1
AR_0056	CP027123	ST2	3	AR_0056 plasmid unnamed2	CP027121	Pacbio; Illumina/SMRT, HGAP, SPAdes	72105/33.62	0.9975	NA	NA	NA	GR6	102	blaOXA-23_1
DT-Ab007	CP050914	ST2	1	unnamed1	CP050915	nanopore/Unicycler	92021/34.49	0.991	2017	sputum	China	GR6	112	NA
FDAARGOS_1360	CP069840	ST2	2	unnamed1	CP069841	Pacbio; Illumina/SMRT, HGAP	76933/33.65	0.9906	NA	NA	USA	GR6	104	blaOXA-23_1, aph(3')-VIa_1
JBA13	CP020584	ST2	1	pJBA13_1	CP020582	PacBio/HGAP	90972/34.42	0.9886	2013	sputum	South Korea	GR6	111	NA
KAB04	CP017648	ST2	1	unnamed	CP017649	PacBio/SMRT Analysis	121485/34.54	0.985	2015	sputum	South Korea	GR6	162	NA

## Sheet: Table S6
	GIs identified in ACICU and AB329
	ACICU								AB329
	Name	Accession no.	Start locus_tag	Stop locus_tag	Length	Start position	Stop position		Start position	Stop position		% Coverage	% Identity
1	G01	CP000863.1	ACICU_00075	ACICU_00085	10951	83426	94376	G01
2	G02	CP000863.1	ACICU_00102	ACICU_00114	14068	115768	129835	G02
3	G04	CP000863.1	ACICU_00220	ACICU_00240	15364	248835	264198	G04
4	G06	CP000863.1	ACICU_00517	ACICU_00535	16628	570818	587445	G06	548093	564720	-16627	100	99.98
5	G10	CP000863.1	ACICU_00681		2688	752775	755462	G10	731316	734003	-2687	100	100
6	G11	CP000863.1	ACICU_00685	ACICU_00701	24482	762391	786872	G11	740859	759954	-19095	95	99.97
7	G13	CP000863.1	ACICU_00862	ACICU_00868	6410	960374	966783	G13
8	G14	CP000863.1	ACICU_00873	ACICU_00880	9451	972098	981548	G14	1053644	1063102	-9458	100	95.96
9	G16	CP000863.1	ACICU_00998	ACICU_01075	53106	1114716	1167821	G16	1200200	1227233	-27033	88	99.99
10	G18	CP000863.1	ACICU_01107	ACICU_01109	2200	1204403	1206602	G18
11	G19	CP000863.1	ACICU_01116	ACICU_01125	12048	1210175	1222222	G19
12	G25	CP000863.1	ACICU_01261	ACICU_01263	8641	1359160	1367800	G25
13	G26	CP000863.1	ACICU_01274	ACICU_01276	1351	1378965	1380315	G26	1466145	1467495	-1350	100	100
14	G28	CP000863.1	ACICU_01349	ACICU_01353	3364	1455736	1459099	G28	1544110	1547851	-3741	100	100
15	G32	CP000863.1	ACICU_01698	ACICU_01702	5797	1815913	1821709	G32	1907273	1913069	-5796	100	99.98
16	G33	CP000863.1	ACICU_ 01822	ACICU_ 01814	10880	1935566	1946445	G33	2031878	2042752	-10874	99	99.97
17	G34	CP000863.1	ACICU_01833	ACICU_01838	3973	1959571	1963543	G34	2055897	2059869	-3972	100	99.87
18	G35	CP000863.1	ACICU_01852	ACICU_01863	6361	1978704	1985064	G35	2075029	2081390	-6361	100	99.91
19	G36	CP000863.1	ACICU_01870	ACICU_01879	7700	1990539	1998238	G36	2086866	2094565	-7699	100	100
20	G37	CP000863.1	ACICU_01891	ACICU_01897	10325	2012250	2022574	G37	2112060	2121994	-9934	100	99.79
21	G38	CP000863.1	ACICU_01909	ACICU_01912	8949	2032187	2041135	G38	2131606	2140555	-8949	100	99.96
22	G40	CP000863.1	ACICU_01930	ACICU_01934	5881	2059797	2065677	G40	2160407	2168137	-7730	100	99.63
23	G41	CP000863.1	ACICU_01937	ACICU_01948	12327	2067948	2080274	G41	2168541	2180868	-12327	100	99.99
24	G42	CP000863.1	ACICU_02140	ACICU_02235	8379	2357189	2365567	G42	2424886	2433264	-8378	100	99.45
25	G54	CP000863.1	ACICU_02596	ACICU_02623	32600	2754085	2786684	G54	2834165	2866768	-32603	100	99.98
26	G56	CP000863.1	ACICU_02705	ACICU_02772	53620	2878776	2932395	G56
27	G58	CP000863.1	ACICU_02893	ACICU_02894	1577	3053666	3055242	G58
28	G60	CP000863.1	ACICU_03147	ACICU_03148	1715	3348441	3350155	G60	3369943	3371657	-1714	100	100
29	G61	CP000863.1	ACICU_03158	ACICU_03160	3044	3361969	3365012	G61
